# Supplementary material
Source: HighWire-hosted journal article supplement (https://ard.bmj.com/content/annrheumdis-2019-216656)
Supplement: inline-supplementary-material-1 [file inline-supplementary-material-1.pdf]

## Supplementary appendix

|                                                                                                                                                                                 |    |
|---------------------------------------------------------------------------------------------------------------------------------------------------------------------------------|----|
| Section 1: Search strategy and PICOs.....                                                                                                                                       | 3  |
| Table S1.1: MEDLINE Search strategy: biological DMARDs.....                                                                                                                     | 3  |
| Table S1.2: EMBASE Search strategy: biological DMARDs .....                                                                                                                     | 5  |
| Table S1.3: Cochrane Library Search strategy: biological DMARDs .....                                                                                                           | 7  |
| Table S1.4: MEDLINE Search strategy: conventional and targeted synthetic DMARDs + Glucocorticoids .....                                                                         | 9  |
| Table S1.5: EMBASE Search strategy: conventional and targeted synthetic DMARDs + Glucocorticoids .....                                                                          | 12 |
| Table S1.6: Cochrane Library Search strategy: conventional and targeted synthetic DMARDs + Glucocorticoids.....                                                                 | 15 |
| Table S1.7: Pharmacologic interventions of interest .....                                                                                                                       | 18 |
| Table S1.8: Patient population, Intervention, Control (PICO) definition. ....                                                                                                   | 19 |
| Section 2: Study characteristics of articles and abstracts included.....                                                                                                        | 21 |
| Table S2.1: Details of articles and abstracts selected for inclusion. ....                                                                                                      | 21 |
| Table S2.2: Risk of bias analysis.....                                                                                                                                          | 28 |
| Table S2.3: Baseline characteristics of trials investigating bDMARDs ± csDMARDs versus placebo. ...                                                                             | 35 |
| Table S2.3: Baseline characteristics of bDMARD Head-to-Head trials.....                                                                                                         | 38 |
| Table S2.4: Baseline characteristics of trials investigating switching between different bDMARDs. ...                                                                           | 39 |
| Table S2.5: Baseline characteristics of bDMARD induction vs. csDMARD induction trials in early RA. 40                                                                           |    |
| Table S2.6: Baseline characteristics studies investigating strategic studies. ....                                                                                              | 41 |
| Table S2.7: Baseline characteristics studies investigating tapering of DMARDs.....                                                                                              | 42 |
| Table S2.8: Baseline characteristics studies investigating tsDMARDs ± csDMARDs versus placebo ± csDMARDs. ....                                                                  | 45 |
| Table S2.9: Baseline characteristics studies investigating Head-to-Head studies between tsDMARDs and bDMARDs. ....                                                              | 49 |
| Table S2.10: Baseline characteristics of studies investigating the efficacy of boDMARDs (biooriginators) versus bsDMARDs (biosimilars).....                                     | 50 |
| Table S2.11: Patient characteristics of studies investigating the efficacy of switching between boDMARDs (biooriginators) and bsDMARDs (biosimilars).....                       | 52 |
| Table S2.12: Patient characteristics of studies investigating the efficacy of csDMARDs (or combination with csDMARDs/GCs) vs. another csDMARD (or combination) or placebo. .... | 53 |
| Section 3: Efficacy outcomes .....                                                                                                                                              | 54 |
| Table S3.1: Efficacy outcomes of trials investigating bDMARDs ± csDMARDs versus placebo.....                                                                                    | 54 |
| Table S3.2: Efficacy outcomes of trials comparing bDMARD to other bDMARDs. ....                                                                                                 | 57 |
| Table S3.3: Efficacy outcomes of trials investigating switching of different bDMARDs. ....                                                                                      | 58 |

|                                                                                                                                                                          |    |
|--------------------------------------------------------------------------------------------------------------------------------------------------------------------------|----|
| Table S3.4: Efficacy outcomes of trials investigating bDMARD induction vs. csDMARD induction trials in early RA.....                                                     | 59 |
| Table S3.5: Efficacy of strategic studies. ....                                                                                                                          | 60 |
| Table S3.6: Efficacy of trials investigating bDMARD and tsDMARD tapering. ....                                                                                           | 61 |
| Table S3.7: Efficacy of trials investigating csDMARD or glucocorticoid tapering.....                                                                                     | 63 |
| Table S3.8: Efficacy of trials investigating combined bDMARD and/or csDMARD tapering.....                                                                                | 64 |
| Table S3.9: Efficacy of trials investigating tsDMARDs ± csDMARDs versus Placebo ± csDMARDs. ....                                                                         | 65 |
| Table S3.10: Efficacy of Head-to-Head studies comparing tsDMARDs and bDMARDs. ....                                                                                       | 68 |
| Table S3.11: Efficacy outcomes of trials investigating biosimilars. ....                                                                                                 | 69 |
| Table S3.12: Efficacy outcomes of trials investigating switching between bsDMARDs and their respective boDMARDs.....                                                     | 71 |
| Table S3.13: Efficacy outcomes of trials investigating the efficacy of csDMARDs (or combination with csDMARDs/GCs) vs. another csDMARD (or combination) or placebo. .... | 73 |
| Section 4: References .....                                                                                                                                              | 74 |
| Section 5: List of abbreviations .....                                                                                                                                   | 86 |

## Section 1: Search strategy and PICOs

Table S1.1: MEDLINE Search strategy: biological DMARDs

1. exp arthritis, rheumatoid/
2. ((rheumatoid or reumatoid or rheumat\$ or reumat\$) adj3 (arthrit\$ or artrit\$ or diseas\$ or condition\$ or nodule\$)).tw.
3. (felty\$ adj2 syndrome).tw.
4. (caplan\$ adj2 syndrome).tw.
5. or/1-4
6. exp biological therapy/
7. exp antibodies, monoclonal/
8. exp monokines/
9. exp receptors, interleukin-1/
10. exp receptors, interleukin-6/
11. exp immunoglobulin g/
12. exp immunoconjugates/
13. exp polyethylene glycols/
14. exp immunoglobulin fab fragments/
15. exp t-lymphocytes/
16. biologic\$.tw.
17. bDMARD\$.tw.
18. biosimilar\$.tw.
19. infliximab.tw.
20. remicade.tw.
21. adalimumab.tw.
22. humira.tw.
23. trudexa.tw.
24. abatacept.tw.
25. orenica.tw.
26. anakinra.tw.
27. kineret.tw.
28. Certolizumab.tw.
29. cimzia.tw.
30. Etanercept.tw.
31. enbrel.tw.
32. Golimumab.tw.
33. simponi.tw.
34. rituximab.tw.
35. rituxan.tw.
36. mabthera.tw.
37. Tocilizumab.tw.
38. actemra.tw.
39. RoActemra.tw.
40. Ofatumumab.tw.
41. Arzerra.tw.
42. Sarilumab.tw.

43. Sirukumab.tw.
44. Ocrelizumab.tw.
45. Tabalumab.tw.
46. Olokizumab.tw.
47. Clazakizumab.tw.
48. Pateclizumab.tw.
49. Ixekizumab.tw.
50. Taltz.tw.
51. Brodalumab.tw.
52. Siliq.tw.
53. Guselkumab.tw.
54. Ustekinumab.tw.
55. Stelara.tw.
56. mavrilimumab.tw.
57. or/6-56
58. 5 and 57
59. randomized controlled trial.pt.
60. controlled clinical trial.pt.
61. randomized.ab.
62. placebo.ab.
63. drug therapy.fs.
64. randomly.ab.
65. trial.ab.
66. groups.ab.
67. or/59-66
68. (animals not (humans and animals)).sh.
69. 67 not 68
70. 58 and 69
71. limit 71 to yr="2016 -Current"

## Table S1.2: EMBASE Search strategy: biological DMARDs

#68. #67 AND AND ([article]/lim OR [article in press]/lim) AND [humans]/lim AND AND (2016:py OR 2017:py OR 2018:py OR 2019:py)  
 #67. #55 AND #66  
 #66. #56 OR #57 OR #58 OR #59 OR #60 OR #61 OR #62 OR #63 OR #64 OR #65  
 #65. random\*:ab,ti  
 #64. 'randomized controlled trial'/exp  
 #63. trial:ti  
 #62. allocat\*:ab,ti  
 #61. (doubl\* NEAR/2 blind\*):ab,ti  
 #60. placebo\*:ab,ti  
 #59. crossover\*:ab,ti OR 'cross over\*':ab,ti  
 #58. 'single-blind procedure'  
 #57. 'double blind procedure'/de  
 #56. 'crossover procedure'/de  
 #55. #5 AND #54  
 #54. #6 OR #7 OR #8 OR #9 OR #10 OR #11 OR #12 OR #13 OR #14 OR #15 OR #16 OR #17 OR #18 OR #19 OR #20 OR #21 OR #22 OR #23 OR #24 OR #25 OR #26 OR #27 OR #28 OR #29 OR #30 OR #31 OR #32 OR #33 OR #34 OR #35 OR #36 OR #37 OR #38 OR #39 OR #40 OR #41 OR #42 OR #43 OR #44 OR #45 OR #46 OR #47 OR #48 OR #49 OR #50 OR #51 OR #52 OR #53  
 #53. mavrilimumab:ab,ti  
 #52. stelara:ab,ti  
 #51. ustekinumab:ab,ti  
 #50. guselkumab:ab,ti  
 #49. brodalumab:ab,ti  
 #48. brodalumab:ab,ti  
 #47. taltz:ab,ti  
 #46. ixekizumab:ti,ab  
 #45. pateclizumab:ab,ti  
 #44. clazakizumab:ab,ti  
 #43. olokizumab:ab,ti  
 #42. tabalumab:ab,ti  
 #41. ocrelizumab:ab,ti  
 #40. sirukumab:ab,ti  
 #39. sarilumab:ab,ti  
 #38. arzerra:ab,ti  
 #37. ofatumumab:ab,ti  
 #36. ixekizumab:ab,ti  
 #35. brodalumab:ab,ti  
 #34. stelara:ab,ti  
 #33. ustekinumab:ab,ti  
 #32. cosentyx:ab,ti  
 #31. secukinumab:ab,ti  
 #30. roactemra:ab,ti  
 #29. actemra:ab,  
 #28. tocilizumab:ab,ti  
 #27. mabthera:ab,ti  
 #26. rituxan:ab,ti  
 #25. rituximab:ab,ti  
 #24. simponi:ab,ti  
 #23. golimumab:ab,ti

- #22. enbrel:ab,ti
- #21. etanercept:ab,ti
- #20. 'etanercept'/de
- #19. cimzia:ab,ti
- #18. certolizumab:ab,ti
- #17. kineret:ab,ti
- #16. anakinra:ab,ti
- #15. orenzia:ab,ti
- #14. abatacept:ab,ti
- #13. trudexa:ab,ti
- #12. humira:ab,ti
- #11. adalimumab:ab,ti
- #10. remicade:ab,ti
- #9. 'infliximab':ab,ti
- #8. 'monoclonal antibody'/exp
- #7. biologic\*:ab,ti OR biosimilar\*:ab,ti OR bdmard\*:ab,ti
- #6. 'biological therapy'/exp
- #5. #1 OR #2 OR #3 OR #4
- #4. (caplan\* NEAR/2 syndrome):ab,ti
- #3. (felty\* NEAR/2 syndrome):ab,ti
- #2. ((rheumatoid OR reumatoid OR rheumat\* OR reumat\*) NEAR/3 (arthrit\* OR artrit\* OR diseas\* OR condition\* OR nodule\*)):ab,ti
- #1. 'rheumatoid arthritis'/exp

Table S1.3: Cochrane Library Search strategy: biological DMARDs

- #1 MeSH descriptor: [Arthritis, Rheumatoid] explode all trees
- #2 ((rheumatoid or reumatoid or rheumat\* or reumat\*) near/3 (arthrit\* or artrit\* or diseas\* or condition\* or nodule\*)):ti,ab
- #3 (felty\* near/2 syndrome):ti,ab
- #4 (caplan\* near/j2 syndrome):ti,ab
- #5 #1 or #2 or #3 or #4
- #6 MeSH descriptor: [Biological Therapy] explode all trees
- #7 MeSH descriptor: [Antibodies, Monoclonal] explode all trees
- #8 MeSH descriptor: [Monokines] explode all trees
- #9 MeSH descriptor: [Receptors, Interleukin-1] explode all trees
- #10 MeSH descriptor: [Receptors, Interleukin-6] explode all trees
- #11 MeSH descriptor: [Immunoglobulin G] explode all trees
- #12 MeSH descriptor: [Immunoconjugates] explode all trees
- #13 MeSH descriptor: [Polyethylene Glycols] explode all trees
- #14 MeSH descriptor: [Immunoglobulin Fab Fragments] explode all trees
- #15 MeSH descriptor: [T-Lymphocytes] explode all trees
- #16 biologic\*:ti,ab
- #17 biosimilar\*:ti,ab
- #18 infliximab:ti,ab
- #19 remicade:ti,ab
- #20 adalimumab:ti,ab
- #21 humira:ti,ab
- #22 trudexa:ti,ab
- #23 abatacept:ti,ab
- #24 orenzia:ti,ab
- #25 anakinra:ti,ab
- #26 kineret:ti,ab
- #27 Certolizumab:ti,ab
- #28 cimzia:ti,ab
- #29 Etanercept:ti,ab
- #30 enbrel:ti,ab
- #31 Golimumab:ti,ab
- #32 simponi:ti,ab
- #33 rituximab:ti,ab
- #34 rituxan:ti,ab
- #35 mabthera:ti,ab
- #36 Tocilizumab:ti,ab
- #37 actemra:ti,ab
- #38 RoActemra:ti,ab
- #39 Ofatumumab:ti,ab
- #40 Arzerra:ti,ab
- #41 Sarilumab:ti,ab
- #42 Sirukumab:ti,ab
- #43 Ocrelizumab:ti,ab
- #44 Tabalumab:ti,ab
- #45 Olokizumab:ti,ab
- #46 Clazakizumab:ti,ab
- #47 Pateclizumab:ti,ab
- #48 Ixekizumab:ti,ab
- #49 Taltz:ti,ab

#50 Brodalumab:ti,ab  
#51 Siliq:ti,ab  
#52 Guselkumab:ti,ab  
#53 Ustekinumab:ti,ab  
#54 Stelara:ti,ab  
#55 mavrilimumab:ti,ab  
#56 #6 OR #7 OR #8 OR #9 OR #10 OR #11 OR #12 OR #13 OR #14 OR #15 OR #16 OR #17 OR #18  
OR #19 OR #20 OR #21 OR #22 OR #23 OR #24 OR #25 OR #26 OR #27 OR #28 OR #29 OR #30 OR #31  
OR #32 OR #33 OR #34 OR #35 OR #36 OR #37 OR #38 OR #39 OR #40 OR #41 OR #42 OR #43 OR #44  
OR #45 OR #46 OR #47 OR #48 OR #49 OR #50 OR #51 OR #52 OR #53 OR #54 OR #55  
#57 #5 AND #56 with Cochrane Library publication date Between Jan 2016 and Dec 2018



## Table S1.4: MEDLINE Search strategy: conventional and targeted synthetic DMARDs + Glucocorticoids

1. exp arthritis, rheumatoid/
2. ((rheumatoid or reumatoid or rheumat\$ or reumat\$) adj3 (arthrit\$ or artrit\$ or diseas\$ or condition\$ or nodule\$)).tw.
3. (felty\$ adj2 syndrome).tw.
4. (caplan\$ adj2 syndrome).tw.
5. or/1-4
6. Antirheumatic Agents/
7. Antirheumatic\$.tw.
8. (dmard\$ or sdmard\$).tw.
9. Methotrexate/
10. Methotrexate.tw.
11. (Abitrexate or amet?opterine or Abitrexate or A Met?opterine\$ or Antifolan or Emt?exate or Enthexate or Farmitrexate or Folex or Ledertrexate or Methoblastin or Methohexate or Methotrate or Methylaminopterin or Metotrexat\$ or mtx or Novatrex or Rheumatrex).tw.
12. exp Isoxazoles/
13. isoxazole\$.tw.
14. leflunomide\$.tw.
15. (Afiancen or Arabloc or Arava or Artrilab or Artrimod or Filartros or Inmunoartro or Lefluar or Leflucross or Lefno or Lefra or Lefumide or Lisifen or Molagar or Repso or Rumalef).tw.
16. Sulfasalazine/
17. sulfasalazine.tw.
18. (Salazosulfapyridine or sulfasalazine or Sulfosalazine or Sulfasal#zine or Salazopyridin\$ or asulfidine or azulf#dine).tw.
19. Hydroxychloroquine/
20. Hydroxychloro\$.tw.
21. (Axokineor or Dolquine or Ercoquin or Evoquin or HCQS or HQT or Hydrocad or Hydroquin or Ilinol or Immard or Metirel or Narbon or Oxcq or Oxiklorin or Oxy-Q or Plaquen?l or Polirreuminor or Quensyl or Reuquinol).tw.
22. exp Gold Compounds/
23. exp Organogold Compounds/
24. gold.tw.
25. exp Chloroquine/
26. chloroquine\$.tw.
27. (aralen or arechine or arequin or chingamin or chlorochin or khingamin or nivaquine or oxychloroquine or oxychlorochin or plaquinol or plaquinil or quensy or anoclor or arthrabas or avlocloclor or cidanchin or clopirim or collagenan or daraclor or daramal or dichinalex or difosquin or diroquine or genocin or heliopar or klorokin or malarex or malaviron or mirquin or nivaquine or novo-chloroquine or novochloroquine or paluken or palux or pharmaquinine or plasmoquine or promal or p-roquine or resoquin\$ or savarine or syncoquin or weimerquin).tw.
28. Azathioprine/
29. azathioprine.tw.
30. (Aseroprim or Aseroprin or Azaallen or Azadus or Azafalk or Azafor or Azafrine or Azaglaax or Azahexal or Aza?mun\$ or Azamedac or Azap or Azap?in\$ or Azapress or Aza-Q or Azarek or Azasan or Azathiodura or Azathiodura or Azathioregio or Azatrilem or Azimune or Azop?in\$ or Azoran or Berkapriner or Colinsan or Glaxoprin or Immunoprin or Imuger or Imunen or Imuprin\$ or Imuran or

- Imure?or Imuzat or Oprisine or Satedon or Thioprine or Tiosalprin or Transimune or Zaprine or Zytrim).tw.
31. exp Cyclosporins/
  32. c?closporin\$.tw.
  33. (neoral or gengraf or restasis or sandimmun\$ or sangcya).tw.
  34. exp Penicillamine/
  35. Penicillamine.tw.
  36. (Adalkenor or Artamin or Atamir or Byanodine or Cilamin or Cuprenil or Cuprimine or Cupripen or Depen or Distamin\$ or D-Penammine or Gerodyl or Kelatin\$ or Mercaptyl or Metalcaptase or Pendramine or Rhumantin or Sufortan\$ or Trisorcin or Trolovol).tw.
  37. exp Cyclophosphamide/
  38. (cyclophosph\$ or cytophosphan or Cytoxan or sendoxan or endoxan or neosar or nsc-26271 or procytox or b-518 or ifosfamide or isophosphamide or iphosphamide or isofosfamide or holoxan or nsc-109\$ or asta z 4942 or cfx or phosphoramide mustard\$.tw.
  39. Mycophenolic Acid/
  40. mycophenolate.tw.
  41. (Arzip or Baxmune or CellCept or Cellmune or Celprot or Ceptolate or Imulate or Imuxgen or Lanfetil or Limfocept or Metocris or Micocept or MMF or Mofecept or Mofetyl or Mofilet or Mofimutral or Mometil or Mophecen or Munotras or Myaccord or Mycept or Myclausenor or Mycofenor or Mycolat or Mycoldosa or Mycophen or Myfenax Myfetil or Mygref or Myotec or Mysept or Presumin or Refrat or Renocell or Supresta or Tevaccept or Trixin).tw.
  42. exp Chlorambucil/
  43. chlorambucil.tw.
  44. (Amboclorin or Clokeran or Leukeran or Linfolysin or Lympholysin).tw.
  45. Minocycline/
  46. minocyclin\$.tw.
  47. (Acneclin or Akamin or Aknemin or Akne-Puren or Aknereduct or Aknin-Mino or Aknin-N or Aknoral or Aknosan or Apominolin or Arestinor or Auramin or Blemix or Borymycin or Cipancin or Cyclimycin or Dentomycin\$ or durakne or Dynacin or Enca or Icht-Oralor or Klinoc or Klinomycin or Klinotab or Lederderm or Logryx or Meibi or Mestacine or Micromycin or Minac 50 or Minakne or Minaxen or Mino-50 or Minocin or Minoclin or Minodene or Minoderm or Minogalen or Minolis or Minomax or Minomycin or Minoplus or Minosil or Minostad or Minotab\$ or Minotekor or Minotrex or Minotyrol or Mino-Wolff or Minox or Mynocine or Myrac or Oracyclin or Parocline or Periocline or Peritrol or Ranmino or Romin or Seboclear or Sebomin or Sebren or Skid or Skinocyclin or Solodyn or Spicline or Triomin or Udimin or Vectrin or Yelnac or Zacnan).tw.
  48. Pyrroles/
  49. tofacitinib.tw.
  50. Xeljanz.tw.
  51. baricitinib.tw.
  52. peficitinib.tw.
  53. filgotinib.tw.
  54. upadacitinib.tw.
  55. fostamatinib.tw.
  56. exp Glucocorticoids/
  57. glucocorticoid\$.tw.
  58. (Beclomethasone or Betamethasone or Budesonide or Clobetasol or Desoximetasone or Dexamethasone or Diflucortolone or Flumethasone or Fluocinonide or Fluocortolone or Fluorometholone or Fluprednisolone or Flurandrenolone or Melengestrol Acetate or Methylprednisolone or Paramethasone or Prednisolone or Prednisone or Triamcinolone).tw.

59. or/6-58
60. 5 and 59
61. randomized controlled trial.pt.
62. controlled clinical trial.pt.
63. randomized.ab.
64. placebo.ab.
65. drug therapy.fs.
66. randomly.ab.
67. trial.ab.
68. groups.ab.
69. or/61-68
70. (animals not (humans and animals)).sh.
71. 69 not 70
72. 60 and 71
73. limit 72 to yr="2016 -Current"

## Table S1.5: EMBASE Search strategy: conventional and targeted synthetic DMARDs + Glucocorticoids

#71. #70 AND (2016:py OR 2017:py OR 2018:py OR 2019:py)  
 #70. #57 AND #68 AND ([article]/lim OR [article in press]/lim) AND [humans]/lim  
 #69. #57 AND #68  
 #68. #58 OR #59 OR #60 OR #61 OR #62 OR #63 OR #64 OR #65 OR #66 OR #67  
 #67. random\*:ab,ti  
 #66. 'randomized controlled trial'/exp  
 #65. trial:ti  
 #64. allocat\*:ab,ti  
 #63. (doubl\* NEAR/2 blind\*):ab,ti  
 #62. placebo\*:ab,ti  
 #61. crossover\*:ab,ti OR 'cross over\*':ab,ti  
 #60. 'single-blind procedure'  
 #59. 'double blind procedure'/de  
 #58. 'crossover procedure'/de  
 #57. #5 AND #56  
 #56. #6 OR #7 OR #8 OR #9 OR #10 OR #11 OR #12 OR #13 OR #14 OR #15 OR #16 OR #17 OR #18 OR  
 #19 OR #20 OR #21 OR #22 OR #23 OR #24 OR #25 OR #26 OR #27 OR #28 OR #29 OR #30 OR #31 OR  
 #32 OR #33 OR #34 OR #35 OR #36 OR #37 OR #38 OR #39 OR #40 OR #41 OR #42 OR #43 OR #44 OR  
 #45 OR #46 OR #47 OR #48 OR #49 OR #50 OR #51 OR #52 OR #53 OR #54 OR #55  
 #55. beclomethasone:ti,ab OR betamethasone:ti,ab OR budesonide:ti,ab OR clobetasol:ti,ab OR  
 desoximetasone:ti,ab OR dexamethasone:ti,ab OR diflucortolone:ti,ab OR flumethasone:ti,ab OR  
 fluocinonide:ti,ab OR fluocortolone:ti,ab OR fluorometholone:ti,ab OR fluprednisolone:ti,ab OR  
 flurandrenolone:ti,ab OR 'melengestrol acetate':ti,ab OR methylprednisolone:ti,ab OR  
 paramethasone:ti,ab OR prednisolone:ti,ab OR prednisone:ti,ab OR triamcinolone:ti,ab  
 #54. glucocorticoid\*:ti,ab  
 #53. 'glucocorticoid'/exp  
 #52. fostamatinib.:ti,ab  
 #51. upadacitinib.:ti,ab  
 #50. filgotinib.:ti,ab  
 #49. peficitinib:ti,ab  
 #48. baricitinib:ti,ab  
 #47. xeljanz:ab,ti  
 #46. tofacitinib:ab,ti  
 #45. acneclin:ab,ti OR akamin:ab,ti OR aknemin:ab,ti OR 'akne puren':ab,ti OR aknereduct:ab,ti OR  
 'aknin mino':ab,ti OR 'aknin n':ab,ti OR aknoral:ab,ti OR aknosan:ab,ti OR apominolin:ab,ti OR  
 arestinor:ab,ti OR auramin:ab,ti OR blemix:ab,ti OR borymycin:ab,ti OR cipancin:ab,ti OR  
 cyclimycin:ab,ti OR dentomycin\*:ab,ti OR durakne:ab,ti OR dynacin:ab,ti OR enca:ab,ti OR 'icht  
 oralor':ab,ti OR klinoc:ab,ti OR klinomycin:ab,ti OR klinotab:ab,ti OR lederderm:ab,ti OR logryx:ab,ti  
 OR meibi:ab,ti OR mestacine:ab,ti OR micromycin:ab,ti OR 'minac 50':ab,ti OR minakne:ab,ti OR  
 minaxen:ab,ti OR 'mino 50':ab,ti OR minocin:ab,ti OR minoclin:ab,ti OR minodene:ab,ti OR  
 minoderm:ab,ti OR minogalen:ab,ti OR minolis:ab,ti OR minomax:ab,ti OR minomycin:ab,ti OR  
 minoplus:ab,ti OR minosil:ab,ti OR minostad:ab,ti OR minotab\*:ab,ti OR minotekor:ab,ti OR  
 minotrex:ab,ti OR minotyrol:ab,ti OR 'mino wolff':ab,ti OR minox:ab,ti OR mynocine:ab,ti OR  
 myrac:ab,ti OR oracyclin:ab,ti OR parocline:ab,ti OR periocline:ab,ti OR peritrol:ab,ti OR ranmino:ab,ti  
 OR romin:ab,ti OR seboclear:ab,ti OR sebomin:ab,ti OR sebren:ab,ti OR skid:ab,ti OR skinocyclin:ab,ti  
 OR solodyn:ab,ti OR spicline:ab,ti OR triomin:ab,ti OR udimin:ab,ti OR vectrin:ab,ti OR yelnac:ab,ti OR  
 zacnan:ab,ti  
 #44. minocyclin\*:ab,ti  
 #43. 'minocycline'/de

#42. amboclorin:ab,ti OR clokeran:ab,ti OR leukeran:ab,ti OR linfolysin:ab,ti OR lympholysin:ab,ti  
 #41. chlorambucil:ab,ti  
 #40. 'chlorambucil'/de  
 #39. arzip:ab,ti OR baxmune:ab,ti OR cellcept:ab,ti OR cellmune:ab,ti OR celprot:ab,ti OR ceptolate:ab,ti OR imulate:ab,ti OR muxgen:ab,ti OR lanfetil:ab,ti OR limfocept:ab,ti OR metocris:ab,ti OR micocept:ab,ti OR mmf:ab,ti OR mofecept:ab,ti OR mofetyl:ab,ti OR mofilet:ab,ti OR mofimutal:ab,ti OR mometil:ab,ti OR mophecen:ab,ti OR munotras:ab,ti OR myaccord:ab,ti OR mycept:ab,ti OR myclausenor:ab,ti OR mycofenor:ab,ti OR mycolat:ab,ti OR mycoldosa:ab,ti OR mycophen:ab,ti OR myfenax:ab,ti AND myfetil:ab,ti OR mygref:ab,ti OR myotec:ab,ti OR mysept:ab,ti OR presumin:ab,ti OR refrat:ab,ti OR renocell:ab,ti OR supresta:ab,ti OR tevacept:ab,ti OR trixin:ab,ti  
 #38. mycophenolate:ab,ti  
 #37. 'mycophenolic acid'/de  
 #36. cyclophosph\*:ab,ti OR cytophosphan:ab,ti OR cytoxan:ab,ti OR sendoxan:ab,ti OR endoxan:ab,ti OR neosar:ab,ti OR 'nsc 26271':ab,ti OR procytox:ab,ti OR 'b 518':ab,ti OR ifosfamide:ab,ti OR isophosphamide:ab,ti OR iphosphamide:ab,ti OR isofosfamide:ab,ti OR holoxan:ab,ti OR 'nsc 109':ab,ti OR 'asta z 4942':ab,ti OR cfx:ab,ti OR 'phosphoramid mustard':ab,ti OR 'phosphoramid mustards':ab,ti  
 #35. 'cyclophosphamide'/de  
 #34. adalkenor:ab,ti OR artamin:ab,ti OR atamir:ab,ti OR byanodine:ab,ti OR cilamin:ab,ti OR cuprenil:ab,ti OR cuprimine:ab,ti OR cupripen:ab,ti OR depen:ab,ti OR distamin\*:ab,ti OR 'd penamine':ab,ti OR gerodyl:ab,ti OR kelatin\*:ab,ti OR mercaptyl:ab,ti OR metalcaptase:ab,ti OR pendramine:ab,ti OR rhumantim:ab,ti OR sufortan\*:ab,ti OR trisorcin:ab,ti OR trolovol:ab,ti  
 #33. 'penicillamine'/de  
 #32. neoral:ab,ti OR gengraf:ab,ti OR restasis:ab,ti OR sandimmun\*:ab,ti OR sangcya:ab,ti  
 #31. cyclosporin\*:ab,ti OR ciclosporin\*:ab,ti  
 #30. 'cyclosporin derivative'/de  
 #29. aseroprim:ab,ti OR aseroprin:ab,ti OR azaallen:ab,ti OR azadus:ab,ti OR azafalk:ab,ti OR azafor:ab,ti OR azafrine:ab,ti OR azagla:ab,ti OR azahexal:ab,ti OR azamun\*:ab,ti OR azaimun:ab,ti OR azamedac:ab,ti OR azap:ab,ti OR azapin\*:ab,ti OR azaprime\*:ab,ti OR azapress:ab,ti OR 'aza q':ab,ti OR azarek:ab,ti OR azasan:ab,ti OR azathiodura:ab,ti OR azathioregio:ab,ti OR azatrimem:ab,ti OR azimune:ab,ti OR azopin\*:ab,ti OR azoran:ab,ti OR berkaprine:ab,ti OR colinsan:ab,ti OR glaxoprin:ab,ti OR immunoprin:ab,ti OR imuger:ab,ti OR imunen:ab,ti OR imuprin\*:ab,ti OR imuran:ab,ti OR imure\*:ab,ti OR imuzat:ab,ti OR oprisine:ab,ti OR satedon:ab,ti OR thioprine:ab,ti OR tiosalprin:ab,ti OR transimune:ab,ti OR zaprine:ab,ti OR zytrim:ab,ti  
 #28. azathioprine:ab,ti  
 #27. 'azathioprine'/de  
 #26. aralen:ab,ti OR arechine:ab,ti OR arequin:ab,ti OR chingamin:ab,ti OR chlorochin:ab,ti OR khingamin:ab,ti OR oxychloroquine:ab,ti OR oxychlorochin:ab,ti OR plaquinol:ab,ti OR plaquinil:ab,ti OR quensy:ab,ti OR anoclor:ab,ti OR arthrabas:ab,ti OR avloclor:ab,ti OR cidanchin:ab,ti OR clopirim:ab,ti OR collagenan:ab,ti OR daraclor:ab,ti OR daramal:ab,ti OR dichinalex:ab,ti OR difosquin:ab,ti OR diroquine:ab,ti OR genocin:ab,ti OR heliopar:ab,ti OR klorokin:ab,ti OR malarex:ab,ti OR malaviron:ab,ti OR mirquin:ab,ti OR nivaquine:ab,ti OR 'novo chloroquine':ab,ti OR novochloroquine:ab,ti OR paluken:ab,ti OR palux:ab,ti OR pharmaquinine:ab,ti OR plasmquinine:ab,ti OR promal:ab,ti OR 'p roquine':ab,ti OR resoquin\$:ab,ti OR savarine:ab,ti OR syncoquin:ab,ti OR weimerquin:ab,ti  
 #25. chloroquine\*:ab,ti  
 #24. 'chloroquine'/de  
 #23. gold:ab,ti  
 #22. 'gold therapy'/de  
 #21. axokineor:ab,ti OR dolquine:ab,ti OR ercoquin:ab,ti OR evoquin:ab,ti OR hcqs:ab,ti OR hqt:ab,ti OR hydrocad:ab,ti OR hydroquin:ab,ti OR ilinol:ab,ti OR immard:ab,ti OR metirel:ab,ti OR narbon:ab,ti OR oxcq:ab,ti OR oxiklorin:ab,ti OR 'oxy q':ab,ti OR plaquenil:ab,ti OR polirreuminor:ab,ti

OR quensyl:ab,ti OR reuquinol:ab,ti  
#20. hydroxychloro\*:ab,ti  
#19. 'hydroxychloroquine'/de  
#18. salazosulfapyridine:ab,ti OR sulfasalazine:ab,ti OR sulfosalazine:ab,ti OR sulfasazine:ab,ti OR sulfazine:ab,ti OR salazopyridin\*:ab,ti OR asulfidine:ab,ti OR azulfadine:ab,ti OR azulfidine:ab,ti  
#17. sulfasalazine:ab,ti  
#16. 'salazosulfapyridine'/de  
#15. afiancen:ab,ti OR arabloc:ab,ti OR arava:ab,ti OR artrilab:ab,ti OR artrimod:ab,ti OR filartros:ab,ti OR inmunoartro:ab,ti OR lefluar:ab,ti OR leflucross:ab,ti OR lefno:ab,ti OR lefra:ab,ti OR lefumide:ab,ti OR lisifen:ab,ti OR molagar:ab,ti OR repso:ab,ti OR rumalef:ab,ti  
#14. isoxazole\*:ab,ti  
#13. 'isoxazole derivative'/exp  
#12. ametopterine:ab,ti OR amethopterine:ab,ti OR abitrexate:ab,ti OR 'a metopterine':ab,ti OR 'a methopterine':ab,ti OR antifolan:ab,ti OR emtexate:ab,ti OR emtexasate:ab,ti OR enthexate:ab,ti OR farmitrexate:ab,ti OR folex:ab,ti OR ledertrexate:ab,ti OR methoblastin:ab,ti OR methohexate:ab,ti OR methotrate:ab,ti OR methylaminopterin:ab,ti OR metotrexat\*:ab,ti OR mtx:ab,ti OR novatrex:ab,ti OR rheumatrex:ab,ti  
#11. methotrexate:ab,ti  
#10. 'methotrexate'/de  
#9. 'disease modifying antirheumatic':ab,ti OR 'disease modifying antirheumatics':ab,ti  
#8. dmard\*:ab,ti OR sdmard\*:ti,ab  
#7. antirheumatic\*:ab,ti  
#6. 'disease modifying antirheumatic drug'/de  
#5. #1 OR #2 OR #3 OR #4  
#4. (caplan\* NEAR/2 syndrome):ab,ti  
#3. (felty\* NEAR/2 syndrome):ab,ti  
#2. ((rheumatoid OR reumatoid OR rheumat\* OR reumat\*) NEAR/3 (arthrit\* OR artrit\* OR diseas\* OR condition\* OR nodule\*)):ab,ti  
#1. 'rheumatoid arthritis'/exp

Table S1.6: Cochrane Library Search strategy: conventional and targeted synthetic DMARDs + Glucocorticoids

- #1 MeSH descriptor: [Arthritis, Rheumatoid] explode all trees  
 #2 ((rheumatoid or reumatoid or rheumat\* or reumat\*) near/3 (arthrit\* or artrit\* or diseas\* or condition\* or nodule\*)):ti,ab  
 #3 (felty\* near/2 syndrome):ti,ab  
 #4 (caplan\* near/j2 syndrome):ti,ab  
 #5 #1 or #2 or #3 or #4  
 #6 MeSH descriptor: [Antirheumatic Agents] explode all trees  
 #7 Antirheumatic\*:ti,ab  
 #8 dmard\*:ti,ab  
 #9 MeSH descriptor: [Methotrexate] this term only  
 #10 Methotrexate:ti,ab  
 #11 (Abitrexate or amet?opterin or Abitrexate or A Met?opterin\* or Antifolan or Emt?exate or Enthexate or Farmitrexate or Folex or Ledertrexate or Methoblastin or Methohexate or Methotrate or Methylaminopterin or Metotrexat\$ or mtx or Novatrex or Rheumatrex):ti,ab  
 #12 MeSH descriptor: [Isoxazoles] explode all trees  
 #13 isoxazole\*:ti,ab  
 #14 leflunomide\*:ti,ab  
 #15 (Afiancen or Arabloc or Arava or Artrilab or Artrimod or Filartros or Inmunoartro or Lefluar or Leflucross or Lefno or Lefra or Lefumide or Lisifen or Molagar or Repso or Rumalef):ti,ab  
 #16 MeSH descriptor: [Sulfasalazine] this term only  
 #17 sulfasalazine:ti,ab  
 #18 (Salazosulfapyridine or sulfasalazine or Sulfosalazine or Sulfasal?zine or Salazopyridin\* or asulfidine or azulf?dine):ti,ab  
 #19 MeSH descriptor: [Hydroxychloroquine] this term only  
 #20 Hydroxychloro\*:ti,ab  
 #21 (Axokineor or Dolquine or Ercoquin or Evoquin or HCQS or HQT or Hydrocad or Hydroquin or Ilinol or Immard or Metirel or Narbon or Oxcq or Oxiklorin or Oxy-Q or Plaquen?l or Polirreuminor or Quensyl or Reuquinol):ti,ab  
 #22 MeSH descriptor: [Gold Compounds] explode all trees  
 #23 MeSH descriptor: [Organogold Compounds] explode all trees  
 #24 gold:ti,ab  
 #25 MeSH descriptor: [Chloroquine] explode all trees  
 #26 chloroquine\*:ti,ab  
 #27 (aralen or arechine or arequin or chingamin or chlorochin or khingamin or nivaquine or oxychloroquine or oxychlorochin or plaquinol or plaquinil or quensy or anoclor or arthrabas or avloclocl or cidanchin or clopirim or collagenan or daraclor or daramal or dichinalex or difosquin or diroquine or genocin or heliopar or klorokin or malarex or malaviron or mirquin or nivaquine or novo-chloroquine or novochloroquine or paluken or palux or pharmaquinine or plasmquine or promal or p-roquine or resoquin\$ or savarine or syncoquin or weimerquin):ti,ab  
 #28 MeSH descriptor: [Azathioprine] this term only  
 #29 azathioprine:ti,ab  
 #30 (Aseroprim or Aseroprin or Azaallen or Azadus or Azafalk or Azafor or Azafrine or Azaglaax or Azahexal or Aza?mun\* or Azamedac or Azap or Azap?in\* or Azapress or Aza-Q or Azarek or Azasan or Azathiodura or Azathiodura or Azathioregio or Azatrimem or Azimune or Azop?in\* or Azoran or Berkaprime or Colinsan or Glaxoprin or Immunoprin or Imuger or Imunen or Imuprin\$ or Imuran or Imure? or Imuzat or Oprisine or Satedon or Thioprine or Tiosalprin or Transimune or Zaprine or Zytrim):ti,ab  
 #31 MeSH descriptor: [Cyclosporins] explode all trees  
 #32 c?closporin\*:ti,ab

- #33 (neoral or gengraf or restasis or sandimmun\* or sangcya):ti,ab
- #34 MeSH descriptor: [Penicillamine] explode all trees
- #35 Penicillamine:ti,ab
- #36 (Adalkenor or Artamin or Atamir or Byanodine or Cilamin or Cuprenil or Cuprimine or Cupripen or Depen or Distamin\* or D-Penamine or Gerodyl or Kelatin\* or Mercaptyl or Metalcaptase or Pendramine or Rhumantin or Sufortan\* or Trisorcin or Trolovol):ti,ab
- #37 MeSH descriptor: [Cyclophosphamide] explode all trees
- #38 (cyclophosph\* or cytophosphan or Cytoxan or sendoxan or endoxan or neosar or nsc-26271 or procytox or b-518 or ifosfamide or isophosphamide or iphosphamide or isofosfamide or holoxan or nsc-109\* or "asta z 4942" or cfx or "phosphoramid mustard\*"):ti,ab
- #39 MeSH descriptor: [Mycophenolic Acid] this term only
- #40 mycophenolate:ti,ab
- #41 (Arzip or Baxmune or CellCept or Cellmune or Celprot or Ceptolate or Imulate or Imuxgen or Lanfetil or Limfocept or Metocris or Micocept or MMF or Mofecept or Mofetyl or Mofilet or Mofimutal or Mometil or Mophecen or Munotras or Myaccord or Mycept or Myclausenor or Mycofenor or Mycolat or Mycoldosa or Mycophen or Myfenax Myfetil or Mygref or Myotec or Mysept or Presumin or Refrat or Renocell or Supresta or Tevacept or Trixin):ti,ab
- #42 MeSH descriptor: [Chlorambucil] explode all trees
- #43 chlorambucil:ti,ab
- #44 (Amboclorin or Clokeran or Leukeran or Linfolysin or Lympholysin):ti,ab
- #45 MeSH descriptor: [Minocycline] this term only
- #46 minocyclin\*:ti,ab
- #47 (Acneclin or Akamin or Aknemin or Akne-Puren or Aknereduct or Aknin-Mino or Aknin-N or Aknoral or Aknosan or Apominolin or Arestinor or Auramin or Blemix or Borymycin or Cipancin or Cyclimycin or Dentomycin\$ or durakne or Dynacin or Enca or Icht-Oralor or Klinoc or Klinomycin or Klinotab or Lederderm or Logryx or Meibi or Mestacine or Micromycin or "Minac 50" or Minakne or Minaxen or Mino-50 or Minocin or Minoclin or Minodene or Minoderm or Minogalen or Minolis or Minomax or Minomycin or Minoplus or Minosil or Minostad or Minotab\$ or Minotekor or Minotrex or Minotyrol or Mino-Wolff or Minox or Mynocine or Myrac or Oracyclin or Parocline or Periocline or Peritrol or Ranmino or Romin or Seboclear or Sebomin or Sebren or Skid or Skinocyclin or Solodyn or Spicline or Triomin or Udima or Vectrin or Yelnac or Zacnan):ti,ab
- #48 MeSH descriptor: [Pyrroles] this term only
- #49 tofacitinib:ti,ab
- #50 Xeljanz:ti,ab
- #51 baricitinib:ti,ab
- #52 peficitinib:ti,ab
- #53 filgotinib:ti,ab
- #54 upadacitinib:ti,ab
- #55 fostamatinib:ti,ab
- #56 MeSH descriptor: [Glucocorticoids] explode all trees
- #57 glucocorticoid\*:ti,ab
- #58 (Beclomethasone or Betamethasone or Budesonide or Clobetasol or Desoximetasone or Dexamethasone or Diflucortolone or Flumethasone or Fluocinonide or Fluocortolone or Fluorometholone or Fluprednisolone or Flurandrenolone or Melengestrol Acetate or Methylprednisolone or Paramethasone or Prednisolone or Prednisone or Triamcinolone):ti,ab
- #59 #6 OR #7 OR #8 OR #9 OR #10 OR #11 OR #12 OR #13 OR #14 OR #15 OR #16 OR #17 OR #18 OR #19 OR #20 OR #21 OR #22 OR #23 OR #24 OR #25 OR #26 OR #27 OR #28 OR #29 OR #30 OR #31 OR #32 OR #33 OR #34 OR #35 OR #36 OR #37 OR #38 OR #39 OR #40 OR #41 OR #42 OR #43 OR #44 OR #45 OR #46 OR #47 OR #48 OR #49 OR #50 OR #51 OR #52 OR #53 OR #54 OR #55 OR #56 OR #57 OR #58
- #60 #5 AND #59





Table S1.7: Pharmacologic interventions of interest

|                                                 |                                                                                                                                                                                                                                                                                                                                                                                                                                                                           |
|-------------------------------------------------|---------------------------------------------------------------------------------------------------------------------------------------------------------------------------------------------------------------------------------------------------------------------------------------------------------------------------------------------------------------------------------------------------------------------------------------------------------------------------|
| <b>Biological DMARDs (bDMARDs)</b>              | all formulations and duration (biosimilars included): anakinra (ANA), infliximab (INF), etanercept (ETN), adalimumab (ADA), golimumab (GLM), certolizumab pegol (CZP), rituximab (RTX), ofatumumab (OFA), abatacept (ABA), tocilizumab (TCZ), sarilumab (SAR), sirukumab (SKM), ocrelizumab (OKM), tabalumab (TBM), olokizumab (OLO), clazakizumab (CZK), pateclizumab (PZK), ixekizumab (IXE), brodalumab (BLM), guselkumab (GKM), ustekinumab (UKM), mavrilimumab (MVM) |
| <b>Targeted synthetic DMARDs (tsDMARDs)</b>     | Tofacitinib (TOFA), baricitinib (BARI), peficitinib (PEF), filgotinib (FILGO), upadacitinib (UPA), fostamatinib (FOSTA)                                                                                                                                                                                                                                                                                                                                                   |
| <b>Conventional synthetic DMARDs (csDMARDs)</b> | Methotrexate (MTX), leflunomide (LEF), sulfasalazine (SZP), hydroxychloroquine (HCQ), injectable gold (GOLD), chloroquine (CQ)                                                                                                                                                                                                                                                                                                                                            |
| <b>Systemic glucocorticoids (GC)</b>            |                                                                                                                                                                                                                                                                                                                                                                                                                                                                           |
| <b>Any combination of the previous</b>          |                                                                                                                                                                                                                                                                                                                                                                                                                                                                           |

Table S1.8: Patient population, Intervention, Control (PICO) definition.

See table S7 for specific definition of interventions.

| #  | Research question                                                                                         | Population             | Intervention                                                        | Control                                                     | Outcome                                                                                             |
|----|-----------------------------------------------------------------------------------------------------------|------------------------|---------------------------------------------------------------------|-------------------------------------------------------------|-----------------------------------------------------------------------------------------------------|
| 1  | What is the efficacy of each of bDMARDs in combination with MTX $\pm$ other csDMARDs?                     | Adult Patients with RA | bDMARD + MTX $\pm$ other csDMARDs                                   | Comparator not receiving a bDMARD (MTX $\pm$ other csDMARD) | ACR response criteria / DAS28-CRP / EULAR response / ACR-EULAR remission / CDAI / SDAI / HAQ / mTSS |
| 2  | What is the efficacy of bDMARD monotherapy vs. MTX $\pm$ other csDMARDs?                                  | As in #1               | bDMARD monotherapy                                                  | Comparator receiving a csDMARD but not receiving a bDMARD   | As in #1                                                                                            |
| 3  | What is the efficacy of bDMARDs as monotherapy vs. bDMARD + MTX (or other csDMARD) combination therapy?   | As in #1               | bDMARD monotherapy                                                  | bDMARD + MTX and/or other csDMARD combination therapy       | As in #1                                                                                            |
| 4  | What is the efficacy of one bDMARD vs. another (i.e. head to head studies)?                               | As in #1               | bDMARD + MTX $\pm$ other csDMARDs                                   | Other bDMARD + MTX $\pm$ other csDMARDs                     | As in #1                                                                                            |
| 5  | What is the efficacy of switching between the different bDMARDs?                                          | As in #1               | bDMARD + MTX $\pm$ other csDMARDs                                   | Alternative bDMARDs                                         | As in #1                                                                                            |
| 6  | What is the efficacy of bDMARD induction vs bDMARD add-on therapy (strategic studies)                     | As in #1               | bDMARD initiation                                                   | bDMARD add-on to csDMARD                                    | As in #1                                                                                            |
| 7  | What is the efficacy of bDMARD induction vs csDMARD combination induction (strategic studies)             | As in #1               | bDMARD initiation                                                   | csDMARD combination initiation                              | As in #1                                                                                            |
| 8  | What is the efficacy of step up to bDMARD induction vs step up to csDMARD combination (strategic studies) | As in #1               | Step up from csDMARD monotherapy to combination of csDMARD + bDMARD | Step up from csDMARD monotherapy to combination of csDMARDs | As in #1                                                                                            |
| 9  | What is the evidence for stopping bDMARDs?                                                                | As in #1               | bDMARD stopping                                                     | bDMARD continuation                                         | As in #1                                                                                            |
| 10 | What is the evidence for stopping csDMARDs while on csDMARD + bDMARD combination therapy?                 | As in #1               | csDMARD stopping, bDMARD continuation                               | csDMARD continuation, bDMARD continuation                   | As in #1                                                                                            |
| 11 | What is the evidence for bDMARD dose reduction or interval increases?                                     | As in #1               | bDMARD dose reduction or interval increases                         | bDMARD continuation with unchanged dosing/interval          | As in #1                                                                                            |
| 12 | What is the evidence for efficacy of tsDMARDs?                                                            | As in #1               | tsDMARD $\pm$ csDMARDs                                              | Comparator not receiving a tsDMARD $\pm$ csDMARD or placebo | As in #1                                                                                            |
| 13 | What is the evidence for                                                                                  | As in                  | tsDMARD $\pm$                                                       | Comparator                                                  | As in #1                                                                                            |

|    |                                                                                                                        |          |                             |                                            |          |
|----|------------------------------------------------------------------------------------------------------------------------|----------|-----------------------------|--------------------------------------------|----------|
|    | efficacy of bDMARDs vs. tsDMARDs?                                                                                      | #1       | csDMARDs or placebo         | receiving a bDMARD ± csDMARDs or placebo   |          |
| 14 | What is the evidence for efficacy of biosimilars?                                                                      | As in #1 | Biosimilar ± other csDMARDs | respective bDMARD originator               | As in #1 |
| 15 | What is the evidence for switching between bDMARDs (originator) and their respective biosimilars?                      | As in #1 | switching to biosimilar     | continuing respective bDMARD originator    | As in #1 |
| 16 | What is the efficacy of one csDMARD (or combination with csDMARDs/GCs) vs. another csDMARD (or combination) or placebo | As in #1 | csDMARD ± Glucocorticoids   | Other csDMARD or placebo ± Glucocorticoids | As in #1 |

## Section 2: Study characteristics of articles and abstracts included.

Table S2.1: Details of articles and abstracts selected for inclusion.

| PICO | Study                                   | Treatment                           | Target        | Population      |
|------|-----------------------------------------|-------------------------------------|---------------|-----------------|
| 1    | Damjanov 2016 [1]                       | SBI-087                             | CD20          | MTX-IR / TNF-IR |
| 1    | Aletaha 2017 (SIRROUND-T) [2-4]         | Sirukumab                           | IL-6          | TNF-IR          |
| 1    | Buckley ACR 2018 [5]                    | Otilimab                            | GM-CSF        | MTX-IR          |
| 1    | Gupta ACR 2018 [6]                      | Otilimab                            | GM-CSF        | DMARD-IR        |
| 1    | Bi 2018 (RAPID-C) [7]                   | Certolizumab pegol                  | TNF           | MTX-IR          |
| 1    | Takeuchi 2016 (RA0083) [8]              | Olokizumab                          | IL-6          | TNF-IR          |
| 1    | Smolen 2017a [9]                        | Ustekinumab / Guselkumab            | IL12/23; IL23 | MTX-IR          |
| 1    | Burmester 2017b (EARTH EXPLORER 1) [10] | Mavrilimumab                        | GM-CSF        | MTX-IR          |
| 1    | Dorner 2017 [11]                        | Vobarilizumab                       | IL-6R         | MTX-IR          |
| 1    | Weinblatt 2017 [12]                     | Vobarilizumab                       | IL-6R         | MTX-IR          |
| 1    | Fleischmann 2017 (TARGET) [13]          | Sarilumab                           | IL-6R         | TNF-IR          |
| 1    | Tahir 2017 (REASSURE) [14]              | Secukinumab                         | IL-17         | TNF-IR          |
| 1    | Takeuchi 2017 (SIRROUND-D) [15]         | Sirukumab                           | IL-6          | csDMARD-IR      |
| 1    | Mease 2018 [16]                         | CNTO6785                            | IL-17         | MTX-IR          |
| 1    | Tanaka 2018b (KAKEHASI) [17, 18]        | Sarilumab                           | IL6-R         | MTX-IR          |
| 1    | van Vollenhoven 2018 [19]               | Tregalizumab                        | CD4           | MTX-IR          |
| 1    | Dokoupilova 2018 (REASSURE2) [20]       | Secukinumab                         | IL17          | TNF-IR          |
| 1    | Takeuchi 2018a [21]                     | Sirukumab                           | IL-6          | MTX/SZP-IR      |
| 1    | Mazurov 2018 [22]                       | BCD-020                             | CD-20         | bDMARD-IR       |
| 1    | Matsubara 2018 [23]                     | Abatacept vs. MTX                   | CD80/CD86     | MTX-IR          |
| 4    | Porter 2016 (ORBIT) [24]                | Rituximab vs. Etanercept/Adalimumab | CD20 vs. TNF  | CSDMARD-IR      |

|     |                                            |                                                                                                   |                               |                                                                  |
|-----|--------------------------------------------|---------------------------------------------------------------------------------------------------|-------------------------------|------------------------------------------------------------------|
| 4   | Burmester 2017 (MONARCH) [25]              | Sarilumab vs. Adalimumab                                                                          | IL-6R vs. TNF                 | MTX-IR                                                           |
| 4   | Strand 2018a (MONARCH) [26]                | Sarilumab vs. Adalimumab                                                                          | IL-6R vs. TNF                 | MTXIR                                                            |
| 4   | Blanco 2017 (NURTURE 1) [27]               | Secukinumab; Abatacept                                                                            | IL-17; CD80/CD86              | TNF-IR                                                           |
| 4   | Weinblatt 2018 (EARTH EXPLORER 2) [28]     | Mavrilimumab; Golimumab                                                                           | GM-CSF; TNF                   | csDMARD-IR / TNF-IR                                              |
| 4   | Genovese 2018b [29]                        | ABT-122; Adalimumab                                                                               | TNF/IL-17A; TNF               | MTXIR                                                            |
| 4   | Taylor 2018 (SIRROUND-H) [30]              | Sirukumab vs. Adalimumab                                                                          | IL-6 vs. TNF                  | MTXIR                                                            |
| 4.5 | Smolen 2016 (EXXELERATE) [31]              | Certolizumab pegol vs. Adalimumab                                                                 | TNF vs. TNF                   | MTXIR                                                            |
| 5   | Gottenberg 2016 (ROC) [32]                 | Abatacept; Rituximab; Tocilizumab vs. Adalimumab; Certolizumab; Infliximab; Golimumab; Etanercept | CD80/CD86; CD20; IL-6 vs. TNF | TNFIR                                                            |
| 5   | Verschueren 2018 (EXTEND) [33]             | Sarilumab                                                                                         | IL-6R                         | TNF-IR; TCZ-R+IR                                                 |
| 6   | Emery 2017 (C-EARLY) [34]                  | Certolizumab pegol vs. MTX                                                                        | TNF                           | Early RA; csDMARD naïve                                          |
| 6   | Emery ACR 2018 (AVERT-2) [35]              | Abatacept vs. MTX                                                                                 | CD80/CD86                     | Early RA; MTX naïve                                              |
| 6   | Stamm 2018 (DINORA) [36]                   | Infliximab vs. MTX                                                                                | TNF                           | Early RA                                                         |
| 6   | Burmester 2016/2017 (FUNCTION) [37, 38]    | Tocilizumab vs. MTX                                                                               | IL-6R                         | Early RA; MTX naïve                                              |
| 8   | Møller-Bisgaard 2019 (IMAGINE-RA) [39]     | csDMARD; bDMARD; MRI guided T2T vs. conventional T2T                                              |                               | DAS28-CRP $\leq$ 3.2 + no swollen joint                          |
| 8   | Mueller 2019 [40]                          | Certolizumab pegol; csDMARDs; Glucocorticoids; T2T vs. fixed regime                               |                               | csDMARD-IR                                                       |
| 9   | Oba 2017 / Tanaka ACR 2018 (RRRR) [41, 42] | Infliximab                                                                                        | TNF                           | MTX-IR, SDAI remission at week 54                                |
| 9   | Chatzidionysiou 2016 (ADMIRE) [43]         | Adalimumab stopping vs. continuation                                                              | TNF                           | ADA+MTX for 6 months + DAS28 $<$ 2.6 for 3 months                |
| 9   | Moghadam 2016 (POET) [44, 45]              | TNFi stopping vs. TNFi continuation                                                               | TNF                           | TNFi therapy for 1 year + DAS28 $<$ 3.2 for 6 months or based on |

|           |                                     |                                                                                    |           |                                                            |
|-----------|-------------------------------------|------------------------------------------------------------------------------------|-----------|------------------------------------------------------------|
|           |                                     |                                                                                    |           | rheumatologist's impression                                |
| 9         | Emery 2019 (AVERT) [46]             | Abatacept withdrawal and re-treatment on flare                                     | CD80/CD86 | DAS28CRP<3.2 after 12 months                               |
| 9         | Atsumi 2017 (C-OPERA) [47]          | Stopping Certolizumab pegol                                                        | TNF       | Early RA; MTX naïve; Discontinuation of CZP after week 52. |
| 9         | Kaneko 2018 (SURPRISE) [48]         | Stopping Tocilizumab                                                               | IL-6R     | DAS28-ESR<2.6 at week 52                                   |
| 9.11      | Weinblatt 2017 (C-EARLY) [49]       | Certolizumab tapering/stopping vs. Certolizumab continuation                       | TNF       | Early-RA + sustained DAS28-ESR<3.2 at week 40+52           |
| 9.11      | Ibrahim 2017 (OPTIRRA) [50]         | TNFi continuation vs. tapering                                                     | TNF       | DAS28≤3.2 + no increase >0.6 in previous 3 months          |
| 8,9,10,11 | Akdemir 2018 (IMPROVED) [51]        | bDMARD step up vs. csDMARD combination; stepwise T2T tapering according to DAS<1.6 |           | Early RA/undiff. Arthritis                                 |
| 9,10,11   | El Miedany 2016 [52]                | Tapering and stopping bDMARD and/or csDMARD                                        |           | DAS28-ESR<2.6 + csDMARD and bDMARD therapy                 |
| 9,10,11   | Van Mulligen EULAR 2018 (TARA) [53] | TNF vs. csDMARD tapering                                                           |           | bDMARD + csDMARD; DAS≤2.4 + SJC≤1 for >3 months            |
| 10        | Kaeley 2016 (MUSICA) [54]           | Adalimumab initiation; MTX high vs. low dosage                                     | TNF       | MTX-IR                                                     |
| 10        | Keystone 2016 (CAMEO) [55]          | Etanercept; MTX continuation vs. discontinuation                                   | TNF       | MTX-IR; Etanercept + MTX for 6 months                      |
| 10        | Pope EULAR 2017 [56]                | Certolizumab pegol; csDMARD continuation vs. discontinuation                       | TNF       | DAS28-ESR improvement of ≥1.2 after 3 or 6 months          |
| 10        | Pope ACR 2018 [57]                  | Certolizumab pegol; csDMARD continuation vs. discontinuation                       | TNF       | DAS28-ESR improvement of ≥1.2                              |

|    |                                  |                                                         |         |                                                                                       |
|----|----------------------------------|---------------------------------------------------------|---------|---------------------------------------------------------------------------------------|
|    |                                  |                                                         |         | after 3 or 6 months                                                                   |
| 10 | Burmester ACR 2018 (SEMIRA) [58] | Tocilizumab; Glucocorticoid tapering vs. continuation   | IL-6R   | TCZ +/- csDMARDs and GC $\geq 24$ weeks; 5mg GC + DAS28-ESR $\leq 3.2$ $\geq 4$ weeks |
| 10 | Pablos 2018 (JUST-ACT) [59]      | Tocilizumab + MTX; MTX continuation vs. discontinuation | IL-6R   | TCZ + MTX; DAS28 $\leq 3.2$ after 16 weeks                                            |
| 10 | Kremer 2018 (COMP-ACT) [60]      | Tocilizumab + MTX; MTX stopping                         | IL-6R   | DAS28 $\leq 3.2$ at wk24                                                              |
| 10 | Edwards 2018 (ACT-TAPER) [61]    | Tocilizumab + MTX; MTX tapering vs. continuation        | IL-6R   | EULAR good/moderate at wk24                                                           |
| 10 | Stouten 2018 (CareRA) [62]       | Step-down to LEF or MTX monotherapy                     | csDMARD | COBRA Avant-Garde arm; DAS28-CRP $\leq 3.2$ after 40 to 52 weeks                      |
| 11 | Urata EULAR 2016 (r-T4) [63]     | ETN/TCZ/ABA: dose reduction T2T (SDAI/SDAI+MMP3)        |         | bDMARD for 3 months; MMP3 normalization + SDAI $< 3.3$                                |
| 11 | Bouman 2017 (DRESS) [64]         | TNFi tapering vs. continuation                          | TNF     | DAS28-CRP $< 3.2$                                                                     |
| 11 | l'Ami 2018 [65]                  | Adalimumab; interval increase vs. continuation          | TNF     | ADA trough level $> 8$ mcg/ml                                                         |
| 12 | Fleischmann 2015 [66]            | Decernotinib                                            | JAK-3   | csDMARD-IR / TNF-IR                                                                   |
| 12 | Genovese 2016c [67]              | Decernotinib                                            | JAK-3   | csDMARD-IR                                                                            |
| 12 | Genovese 2016b [68]              | Decernotinib                                            | JAK-3   | MTX-IR                                                                                |
| 12 | Takeuchi 2016a [69]              | Peficitinib                                             | JAK-1   | csDMARD-IR / TNF-IR                                                                   |
| 12 | Genovese 2017c [70]              | Peficitinib                                             | JAK-1   | minimal csDMARD exposure; MTX naïve                                                   |
| 12 | Kivitz 2017 [71]                 | Peficitinib                                             | JAK-1   | MTX-IR                                                                                |
| 12 | Tanaka ACR 2018a [72, 73]        | Peficitinib                                             | JAK-1   | csDMARD-IR                                                                            |
| 12 | Takeuchi ACR 2018 [74, 75]       | Peficitinib                                             | JAK-1   | MTX-IR                                                                                |
| 12 | Westhovens 2017 (DARWIN 1) [76]  | Filgotinib                                              | JAK-1   | MTX-IR                                                                                |
| 12 | Kavanaugh 2017 (DARWIN 2) [77]   | Filgotinib                                              | JAK-1   | MTX-IR                                                                                |



|    |                                                    |                                                        |                 |                    |
|----|----------------------------------------------------|--------------------------------------------------------|-----------------|--------------------|
| 12 | van Vollenhoven ACR 2018 (SELECT-EARLY) [78]       | Upadacitinib                                           | JAK-1           | MTX-naïve          |
| 12 | Genovese 2018 (DARWIN 1+2) [79]                    | Filgotinib                                             | JAK-1           | MTXIR              |
| 12 | Kivitz ACR 2018 [80]                               | GS-9876; Filgotinib                                    | SYK; JAK-1      | MTXIR              |
| 12 | Takeuchi 2019 (RA-BEYOND) [81]                     | Baricitinib; Tapering to 2mg vs. BARI 4mg continuation | JAK-1/2         | BARI 4mg + CDAI<10 |
| 12 | Tanaka 2019 [82]                                   | Tofacitinib                                            | JAK-1/3         | MTX-IR             |
| 12 | van der Heijde 2019 (ORAL Scan) [83]               | Tofacitinib                                            | JAK-1/3         | MTX-IR             |
| 12 | Dougados 2017 (RA-BUILD) [84]                      | Baricitinib                                            | JAK-1/2         | csDMARD-IR         |
| 12 | Genovese 2017a [85]                                | Baricitinib                                            | JAK-1/2         | csDMARD-IR         |
| 12 | Fleischmann/Schiff 2017b (RA-BEGIN) [86, 87]       | Baricitinib                                            | JAK-1/2         | csDMARD naïve      |
| 12 | Smolen 2017d (RA-BEACON) [88]                      | Baricitinib                                            | JAK-1/2         | bDMARD-IR          |
| 12 | Tanaka 2018a (SELECT-SUNRISE) [89]                 | Upadacitinib                                           | JAK-1           | csDMARDIR          |
| 12 | van der Heijde 2018 (RA-BEYOND) [90]               | Baricitinib                                            | JAK-1/2         | csDMARD-IR         |
| 12 | Hu 2018 (RA-BALANCE) [91, 92]                      | Baricitinib                                            | JAK-1/2         | MTX-IR             |
| 12 | Genovese/Strand 2018 (SELECT-BEYOND) [93, 94]      | Upadacitinib                                           | JAK-1           | bDMARD-IR          |
| 12 | Burmester 2018 (SELECT-NEXT) [95]                  | Upadacitinib                                           | JAK-1           | csDMARD-IR         |
| 12 | Smolen EULAR/ACR 2018 (SELECT-MONOTHERAPY) [96-99] | Upadacitinib                                           | JAK-1           | MTX-IR             |
| 12 | Strand 2018 (SELECT-NEXT) [100]                    | Upadacitinib                                           | JAK-1           | csDMARD-IR         |
| 13 | Taylor 2017 (RA-BEAM) [101]                        | Baricitinib vs. Adalimumab                             | JAK-1/2 vs. TNF | MTX-IR             |
| 13 | Keystone 2017 (RA-BEAM) [102]                      | Baricitinib vs. Adalimumab                             | JAK-1/2 vs. TNF | MTX-IR             |
| 13 | Strand EULAR 2018 (ORAL-Strategy) [103]            | Tofacitinib vs. Adalimumab                             | JAK-1/3 vs. TNF | MTX-IR             |
| 13 | Fleischmann ACR 2018 (SELECT-COMPARE) [104, 105]   | Upadacitinib vs. Adalimumab                            | JAK-1 vs. TNF   | MTX-IR             |
| 13 | Fleischmann 2017a (ORAL-Strategy) [103, 106]       | Tofacitinib vs. Adalimumab                             | JAK-1/3 vs. TNF | MTX-IR             |
| 14 | O'Dell EULAR 2016 [107]                            | ETN vs. CHS-0214                                       | TNF             | MTXIR              |

|       |                                        |                                 |       |                    |
|-------|----------------------------------------|---------------------------------|-------|--------------------|
| 14    | Jani 2016 [108]                        | Adalimumab vs. ZRC-3197         | TNF   | MTXIR              |
| 14    | Denisov EULAR 2018 (LIRA) [109, 110]   | Infliximab vs. BCD-055          | TNF   | NA                 |
| 14    | Wiland ACR 2018 [111]                  | Adalimumab vs. GP2017           | TNF   | csDMARDIR          |
| 14    | Matsuno and Matsubara 2018 [112]       | Infliximab vs. NI-071           | TNF   | MTX-IR             |
| 14    | Yoo 2016 (PLANETRA) [113]              | Infliximab vs CT-P13            | TNF   | MTXIR              |
| 14    | Bae 2017 (HERA) [114]                  | Etanercept vs. HD203            | TNF   | MTXIR              |
| 14    | Jamshidi 2017 [115]                    | Adalimumab + MTX; CinnoRA + MTX | TNF   | MTXIR              |
| 14    | Smolen 2017c [116]                     | Rituximab + MTX; GP2013 + MTX   | TNF   | TNFIR              |
| 14    | Choe 2017 [117]                        | Infliximab + MTX; SB2 + MTX     | TNF   | MTXIR              |
| 14    | Smolen 2017b [118]                     | Infliximab + MTX; SB2 + MTX     | TNF   | MTXIR              |
| 14    | Cohen 2017 [119]                       | Adalimumab; ABP 501             | TNF   | MTXIR              |
| 14    | Alten EULAR 2017 (ARABESC) [120, 121]  | Adalimumab; FKB327              | TNF   | MTXIR              |
| 14    | Apsangikar 2018 [122]                  | Adalimumab; AdaliRel            | TNF   | MTXIR              |
| 14    | Cohen 2018b [123]                      | Infliximab; PF-06438179         | TNF   | MTXIR              |
| 14    | Haridas 2018 [124]                     | DRL_RI; RMP; Rituximab          | CD-20 | MTXIR              |
| 14    | Matucci-Cerinic 2018 (EQUIRA) [125]    | Etanercept; GP2015              | TNF   | mixed              |
| 14    | Matsuno 2018 [126]                     | Etanercept; LBEC0101            | TNF   | MTXIR              |
| 14    | Fleischmann 2018 [127]                 | Adalimumab; PF-06410293         | TNF   | MTXIR              |
| 14    | Park 2018 [128]                        | CT-P10; Rituximab               | CD-20 | MTXIR              |
| 14,15 | Weinblatt 2018 [129]                   | Adalimumab; SB5                 | TNF   | MTXIR              |
| 14,15 | Nasonov ACR 2016 [130]                 | Rituximab; BCD-020              | CD-20 | TNFIR              |
| 14,15 | Smolen 2018 [131]                      | Infliximab; SB2                 | TNF   | MTXIR              |
| 14,15 | Kavanaugh ACR 2018 (EQUIRA) [132, 133] | Etanercept; GP2015              | TNF   | csDMARD-IR; TNF-IR |
| 14,15 | Cohen 2018a (VOLTAIRE) [134]           | Adalimumab; BI 695501           | TNF   | MTX-IR             |
| 14,15 | Genovese 2017b [135]                   | Adalimumab; FKB327              | TNF   | MTXIR              |
| 15    | Jorgensen 2017 (NOR-SWITCH) [136]      | Infliximab; CT-P13              | TNF   | csDMARDIR          |
| 15    | O'Dell 2017 [137]                      | Etanercept; CHS-0214            | TNF   | MTXIR              |

|    |                                              |                                                                                |                |                               |
|----|----------------------------------------------|--------------------------------------------------------------------------------|----------------|-------------------------------|
| 15 | Song 2018 [138, 139]                         | Etanercept; LBEC0101                                                           | TNF            | MTXIR                         |
| 15 | Weinblatt 2018 [140]                         | Adalimumab; SB5                                                                | TNF            | MTXIR                         |
| 16 | Shin 2019 [141]                              | Tacrolimus + MTX vs. Leflunomide + MTX                                         | csDMARD        | MTX-IR                        |
| 16 | Register ACR 2016 [142]                      | MTX + SZP + HCQ vs. LEF + SZP + HCQ vs. LEF monotherapy                        | csDMARD        | csDMARD-IR, Leflunomide naïve |
| 16 | Verschueren/Stouten (CareRA) 2017 [143, 144] | MTX + SZP + GC vs. MTX + GC vs. MTX + LEF + GC; MTX tight-step up vs. MTX + GC | csDMARD        | Early RA; csDMARD naïve       |
| NA | Stamp 2018 [145]                             | Folic acid reduction in MTX treated patients                                   | MTX/Folic acid | MTX-IR                        |

Table S2.2: Risk of bias analysis.

| Study                                   | Random sequence generation | Allocation concealment | Blinding of participants and personnel | Blinding of outcome assessment | Incomplete outcome data | Selective reporting | Other sources of bias | Summary  | Comment                                                                       |
|-----------------------------------------|----------------------------|------------------------|----------------------------------------|--------------------------------|-------------------------|---------------------|-----------------------|----------|-------------------------------------------------------------------------------|
| Damjanov 2016 [1]                       | Unclear                    | Unclear                | Low                                    | Low                            | Low                     | High                | Low                   | High     | only p values reported, no numerical ACR response rates                       |
| Aletaha 2017 (SIRROUND-T) [2-4]         | Low                        | Low                    | Low                                    | Low                            | Low                     | Low                 | Low                   | Low      |                                                                               |
| Buckley ACR 2018 [5]                    | Abstract                   | Abstract               | Abstract                               | Abstract                       | Abstract                | Abstract            | Abstract              | Abstract |                                                                               |
| Gupta ACR 2018 [6]                      | Abstract                   | Abstract               | Abstract                               | Abstract                       | Abstract                | Abstract            | Abstract              | Abstract |                                                                               |
| Bi 2018 (RAPID-C) [7]                   | Low                        | High                   | Unclear                                | Low                            | Low                     | Low                 | High                  | High     | Potential unblinding during drug administration; High discontinuation numbers |
| Takeuchi 2016 (RA0083) [8]              | Low                        | Low                    | Low                                    | Low                            | Low                     | Low                 | Low                   | Low      |                                                                               |
| Smolen 2017a [9]                        | Unclear                    | Low                    | Low                                    | Low                            | Low                     | Low                 | Low                   | Low      |                                                                               |
| Burmester 2017b (EARTH EXPLORER 1) [10] | Low                        | Low                    | Low                                    | Low                            | Low                     | Low                 | Low                   | Low      |                                                                               |
| Dorner 2017 [11]                        | Abstract                   | Abstract               | Abstract                               | Abstract                       | Abstract                | Abstract            | Abstract              | Abstract |                                                                               |
| Weinblatt 2017 [12]                     | Abstract                   | Abstract               | Abstract                               | Abstract                       | Abstract                | Abstract            | Abstract              | Abstract |                                                                               |
| Fleischmann 2017 (TARGET) [13]          | Low                        | Low                    | Low                                    | Low                            | Low                     | Low                 | Low                   | Low      |                                                                               |
| Tahir 2017 (REASSURE) [14]              | Unclear                    | Unclear                | Low                                    | Low                            | Low                     | Low                 | Low                   | Unclear  |                                                                               |
| Takeuchi 2017 (SIRROUND-D) [15]         | Unclear                    | Unclear                | Low                                    | Low                            | Low                     | Low                 | Low                   | Unclear  |                                                                               |
| Mease 2018 [16]                         | Unclear                    | Unclear                | Low                                    | Low                            | Low                     | Low                 | Low                   | Unclear  |                                                                               |
| Tanaka 2018b                            | Low                        | Low                    | Low                                    | Low                            | Low                     | Low                 | Low                   | Low      |                                                                               |

|                                            |          |          |           |          |          |          |          |          |                                                                  |
|--------------------------------------------|----------|----------|-----------|----------|----------|----------|----------|----------|------------------------------------------------------------------|
| (KAKEHASI) [17, 18]                        |          |          |           |          |          |          |          |          |                                                                  |
| van Vollenhoven 2018 [19]                  | Low      | Low      | Low       | Low      | Low      | Low      | Low      | Low      |                                                                  |
| Dokoupilova 2018 (REASSURE2) [20]          | Unclear  | Unclear  | Low       | Low      | Low      | Low      | Low      | Unclear  |                                                                  |
| Takeuchi 2018a [21]                        | Low      | Low      | Low       | Low      | Low      | Low      | Low      | Low      | Dose finding study; no comparator group                          |
| Mazurov 2018 [22]                          | Abstract | Abstract | Abstract  | Abstract | Abstract | Abstract | Abstract | Abstract |                                                                  |
| Matsubara 2018 [23]                        | Unclear  | Low      | Low       | Low      | Low      | Low      | Low      | Low      |                                                                  |
| Porter 2016 (ORBIT) [24]                   | Low      | Low      | High      | High     | Low      | Low      | Low      | Low      |                                                                  |
| Burmester 2017 (MONARCH) [25]              | Low      | Low      | Low       | Low      | Low      | Low      | Low      | Low      |                                                                  |
| Strand 2018a (MONARCH) [26]                | Low      | Low      | Low       | Low      | Low      | Low      | Low      | Low      |                                                                  |
| Oba 2017 / Tanaka ACR 2018 (RRRR) [41, 42] | Low      | Low      | High      | Low      | Abstract | Abstract | Unclear  | High     | Methodology reported; Results only as abstract; Open label study |
| Blanco 2017 (NURTURE 1) [27]               | Unclear  | Low      | Low       | Low      | Low      | Low      | Low      | Unclear  |                                                                  |
| Weinblatt 2018 (EARTH EXPLORER 2) [28]     | Low      | Low      | Low       | Low      | Low      | Low      | Low      | Low      |                                                                  |
| Genovese 2018b [29]                        | Unclear  | Unclear  | Low       | Low      | Low      | Low      | Low      | Unclear  |                                                                  |
| Taylor 2018 (SIRROUND-H) [30]              | Low      | Low      | Low       | Low      | Low      | Low      | Low      | Low      |                                                                  |
| Smolen 2016 (EXXELERATE) [31]              | Low      | Low      | Low/High* | Low      | Low      | Low      | Low      | Unclear  | unblinding of patients at wk 12                                  |
| Gottenberg 2016 (ROC) [32]                 | Unclear  | Unclear  | High      | High     | Low      | Low      | Low      | High     |                                                                  |
| Verschueren 2018 (EXTEND) [33]             | Abstract | Abstract | Abstract  | Abstract | Abstract | Abstract | Abstract | Abstract |                                                                  |
| Emery 2017 (C-EARLY) [34]                  | Low      | Low      | Low       | Low      | Low      | Low      | Low      | Low      |                                                                  |
| Emery ACR 2018 (AVERT-2) [35]              | Abstract | Abstract | Abstract  | Abstract | Abstract | Abstract | Abstract | Abstract |                                                                  |
| Stamm 2018 (DINORA)                        | Low      | Low      | Low       | Low      | High     | Low      | Low      | High     | 146 pts initially planned in                                     |

|                                         |          |          |          |          |          |          |          |          |                                                                           |
|-----------------------------------------|----------|----------|----------|----------|----------|----------|----------|----------|---------------------------------------------------------------------------|
| [36]                                    |          |          |          |          |          |          |          |          | sample size calculation, 90 recruited                                     |
| Burmester 2016/2017 (FUNCTION) [37, 38] | Low      |                                                                           |
| Møller-Bisgaard 2019 (IMAGINE-RA) [39]  | Low      | Low      | High     | Low      | Low      | Low      | High     | High     | Open label; group imbalances (remission at baseline); one-sided p (<0.05) |
| Mueller 2019 [40]                       | Low      | Low      | High     | Unclear  | Low      | Low      | Low      | High     | Open label; Blinding of outcome assessors not described;                  |
| Chatzidionysiou 2016 (ADMIRE) [43]      | Unclear  | Unclear  | High     | High     | Low      | Low      | Low      | High     | open label                                                                |
| Moghadam 2016/2018 (POET) [44, 45]      | low      | Unclear  | High     | High     | Low      | Low      | Low      | High     | open label                                                                |
| Emery 2019 (AVERT) [46]                 | Low      | Low      | High     | High     | Low      | Low      | Low      | High     | open label; retreatment of patients with flare                            |
| Atsumi 2017 (C-OPERA) [47]              | Low      | Low      | High     | Low      | Low      | Low      | High     | High     | open label                                                                |
| Kaneko 2018 (SURPRISE) [48]             | Low      | Low      | High     | High     | High     | Low      | Low      | High     | lower number randomized as planned                                        |
| Weinblatt 2017 (C-EARLY) [49]           | Low      |                                                                           |
| Ibrahim 2017 (OPTIRRA) [50]             | Low      | Low      | High     | High     | High     | Low      | Low      | High     |                                                                           |
| Kaeley 2016 (MUSICA) [54]               | Low      |                                                                           |
| Keystone 2016 (CAMEO) [55]              | Unclear  | Unclear  | High     | High     | Low      | Low      | High     | High     | many discontinuations because of lack of efficacy in ETN mono arm         |
| Pope 2019 [56, 57, 146]                 | Low      | Low      | High     | High     | Low      | Low      | Low      | High     | Open label                                                                |
| Burmester ACR 2018 (SEMIRA) [58]        | Abstract |                                                                           |
| Pablos 2018 (JUST-ACT) [59]             | Low      |                                                                           |
| Kremer 2018 (COMP-                      | Unclear  | Unclear  | Low      | Low      | Low      | Low      | Low      | Unclear  |                                                                           |

|                                              |          |          |          |          |          |          |          |          |                                                                                                                                         |
|----------------------------------------------|----------|----------|----------|----------|----------|----------|----------|----------|-----------------------------------------------------------------------------------------------------------------------------------------|
| ACT) [60]                                    |          |          |          |          |          |          |          |          |                                                                                                                                         |
| Edwards 2018 (ACT-TAPER) [61]                | Unclear  | Unclear  | Low      | Low      | Unclear  | Low      | Unclear  | Unclear  | terminated early due to poor recruitment                                                                                                |
| Urata EULAR 2016 (r-T4) [63]                 | Abstract |                                                                                                                                         |
| Bouman 2017 (DRESS) [64]                     | Low      | Low      | High     | High     | Low      | Low      | Unclear  | High     |                                                                                                                                         |
| L'Ami 2018 [65]                              | Unclear  | Unclear  | High     | High     | Low      | Low      | Low      | High     |                                                                                                                                         |
| Fleischmann 2015 [66]                        | Low      |                                                                                                                                         |
| Genovese 2016c [67]                          | Low      |                                                                                                                                         |
| Genovese 2016b [68]                          | Unclear  | Unclear  | Low      | Low      | Low      | Low      | Low      | Unclear  |                                                                                                                                         |
| Takeuchi 2016a [69]                          | Unclear  | Unclear  | Low      | Low      | Low      | Low      | Low      | Unclear  |                                                                                                                                         |
| Genovese 2017c [70]                          | Unclear  | Low      | Low      | Low      | Low      | Low      | Unclear  | Unclear  | protocol changes reported in original article with reference to the supplementary material, no information in suppl. material available |
| Kivitz 2017 [71]                             | Unclear  | Low      | Low      | Low      | Low      | Low      | Unclear  | Unclear  |                                                                                                                                         |
| Tanaka ACR 2018a [72, 73]                    | Low      |                                                                                                                                         |
| Takeuchi ACR 2018 [74, 75]                   | Low      |                                                                                                                                         |
| Westhovens 2017 (DARWIN 1) [76]              | Low      |                                                                                                                                         |
| Kavanaugh 2017 (DARWIN 2) [77]               | Low      |                                                                                                                                         |
| van Vollenhoven ACR 2018 (SELECT-EARLY) [78] | Abstract |                                                                                                                                         |
| Genovese 2018 (DARWIN 1+2) [79]              | Low      |                                                                                                                                         |
| Kivitz ACR 2018 [80]                         | Abstract |                                                                                                                                         |
| Takeuchi 2019 (RA-BEYOND) [81]               | Low      |                                                                                                                                         |
| Tanaka 2019 [82]                             | Low      | Low      | Low      | Unclear  | Low      | Low      | Low      | Unclear  |                                                                                                                                         |

|                                                    |          |          |          |          |          |          |          |          |                                                                                                                                                                    |
|----------------------------------------------------|----------|----------|----------|----------|----------|----------|----------|----------|--------------------------------------------------------------------------------------------------------------------------------------------------------------------|
| van der Heijde 2019 (ORAL Scan) [83]               | Low      |                                                                                                                                                                    |
| Dougados 2017 (RA-BUILD) [84]                      | Low      |                                                                                                                                                                    |
| Genovese 2017a [85]                                | Abstract |                                                                                                                                                                    |
| Fleischmann 2017b (RA-BEGIN) [86]                  | Low      |                                                                                                                                                                    |
| Schiff 2017 (RA-BEGIN) [87]                        | Low      |                                                                                                                                                                    |
| Smolen 2017d (RA-BEACON) [88]                      | Low      | Low      | Low      | Low      | Low      | Low      | Unclear  | Low      | protocol changes after the enrollment of 97 patients: Inclusion criteria was revised to require csDMARD-IR (before treatment-naïve patients could enter the study) |
| Tanaka 2018a (SELECT-SUNRISE) [89]                 | Abstract | Open label                                                                                                                                                         |
| van der Heijde 2018 (RA-BEYOND) [90]               | Low      | Low      | High     | Low      | Low      | Low      | Low      | High     |                                                                                                                                                                    |
| Hu 2018 (RA-BALANCE) [91]                          | Abstract |                                                                                                                                                                    |
| Strand 2018 (SELECT-BEYOND) [94]                   | Abstract |                                                                                                                                                                    |
| Yue 2018 (RA-BALANCE) [92]                         | Abstract |                                                                                                                                                                    |
| Genovese 2018a (SELECT-BEYOND) [93]                | Low      |                                                                                                                                                                    |
| Burmester 2018 (SELECT-NEXT) [95, 100]             | Low      |                                                                                                                                                                    |
| Smolen EULAR/ACR 2018 (SELECT-MONOTHERAPY) [96-99] | Low      |                                                                                                                                                                    |
| Taylor 2017 (RA-BEAM)                              | Low      |                                                                                                                                                                    |



|                                                  |          |          |          |          |          |          |          |          |                                                 |
|--------------------------------------------------|----------|----------|----------|----------|----------|----------|----------|----------|-------------------------------------------------|
| [101]                                            |          |          |          |          |          |          |          |          |                                                 |
| Keystone 2017 (RA-BEAM) [102]                    | Low      |                                                 |
| Fleischmann ACR 2018 (SELECT-COMPARE) [104, 105] | Low      |                                                 |
| Fleischmann 2017a (ORAL-Strategy) [103, 106]     | Low      |                                                 |
| O'Dell EULAR 2016 [107]                          | Abstract |                                                 |
| Jani 2016 [108]                                  | Low      | Low      | Low      | Low      | Low      | Low      | High     | High     |                                                 |
| Denisov EULAR 2018 (LIRA) [109, 110]             | Low      |                                                 |
| Wiland ACR 2018 [111]                            | Abstract |                                                 |
| Matsuno and Matsubara 2018 [112]                 | Low      | Low      | Low      | Unclear  | Low      | Low      | Low      | Unclear  |                                                 |
| Yoo 2016 (PLANETRA) [113]                        | Low      |                                                 |
| Bae 2017 (HERA) [114]                            | Low      | Low      | Low      | Low      | Low      | Low      | High     | Low      |                                                 |
| Jamshidi 2017 [115]                              | Low      |                                                 |
| Smolen 2017c [116]                               | Unclear  | Unclear  | Low      | Low      | Low      | Low      | Low      | Unclear  |                                                 |
| Choe 2017 [117]                                  | Low      |                                                 |
| Smolen 2017b [118]                               | Low      |                                                 |
| Cohen 2017 [119]                                 | Low      |                                                 |
| Alten EULAR 2017 (ARABESC) [120, 121]            | Low      |                                                 |
| Apsangkar 2018 [122]                             | Low      | Low      | Low      | Low      | High     | Low      | High     | High     | protocol change: requirement of csdmard washout |
| Cohen 2018b [123]                                | Unclear  | Unclear  | Low      | Low      | Low      | Low      | High     | High     |                                                 |
| Haridas 2018 [124]                               | Abstract |                                                 |
| Matucci-Cerinic 2018 (EQUIRA) [125]              | Low      |                                                 |
| Park 2018 [128]                                  | Unclear  | Unclear  | Low      | Low      | Low      | Low      | Low      | Unclear  |                                                 |

|                                                               |          |          |          |          |          |          |          |          |                                                                        |
|---------------------------------------------------------------|----------|----------|----------|----------|----------|----------|----------|----------|------------------------------------------------------------------------|
| Weinblatt 2018 [129]                                          | Low      |                                                                        |
| Matsuno 2018 [126]                                            | Low      |                                                                        |
| Nasonov ACR 2016 [130]                                        | Abstract |                                                                        |
| Fleischmann 2018 [127]                                        | Unclear  | Unclear  | Low      | Low      | Low      | Low      | Low      | Unclear  |                                                                        |
| Smolen 2018 [131]                                             | Low      |                                                                        |
| Kavanaugh ACR 2018 (EQUIRA) [132, 133]                        | Low      |                                                                        |
| Genovese 2017b [135]                                          | Abstract |                                                                        |
| Jorgensen 2017 (NOR-SWITCH) [136]                             | Low      |                                                                        |
| O'Dell 2017 [137]                                             | Abstract |                                                                        |
| Song 2018 [138, 139]                                          | Low      | Low      | High     | High     | Low      | Low      | Low      | High     | Open label                                                             |
| Weinblatt 2018 [140]                                          | Low      |                                                                        |
| Shin 2019 [141]                                               | Low      | Unclear  | Low      | Unclear  | Low      | Low      | Unclear  | Unclear  | baseline differences between groups                                    |
| Register ACR 2016 [142]                                       | Abstract |                                                                        |
| Verschueren 2017 (CareRA) [143][144][62]{Stouten, 2019 #2147} | Low      | Low      | High     | High     | Low      | Low      | Low      | High     |                                                                        |
| Cohen 2018a (VOLTAIRE) [134]                                  | Low      | Low      | Low      | Low      | High     | Low      | Low      | Unclear  | Efficacy at week 48 not reported numerically                           |
| Akdemir 2018 (IMPROVED) [51]                                  | Low      | Low      | High     | Low      | Low      | Low      | Low      | High     | single blinded                                                         |
| El Miedany 2016 [52]                                          | Unclear  | Unclear  | High     | High     | High     | High     | Low      | High     | open label, primary endpoint (pat in sustained DAS28<2.6) not reported |
| Van Mulligen EULAR 2018 (TARA) [53]                           | Abstract |                                                                        |
| Stamp 2018 [145]                                              | Unclear  | Low      | Low      | Low      | Low      | Low      | Unclear  | Unclear  | Randomization sequence generation not adequately reported;             |

Table S2.3: Baseline characteristics of trials investigating bDMARDs ± csDMARDs versus placebo.

| Study                            | Treatment                     | No. of patients (n) | Mean age (years) | Mean disease duration (years) | Mean DAS28 | Mean HAQ | Mean mTSS |
|----------------------------------|-------------------------------|---------------------|------------------|-------------------------------|------------|----------|-----------|
| Damjanov 2016 [1]                | SBI-087/Pbo/Pbo + MTX         | 43                  | 56.8             | 9                             | 5.7        | 1.5      |           |
|                                  | SBI-087/SBI-087/Pbo + MTX     | 42                  | 53.9             | 8.9                           | 5.5        | 1.5      |           |
|                                  | SBI-087/Pbo/SBI-087 + MTX     | 43                  | 52.9             | 8.9                           | 5.8        | 1.5      |           |
|                                  | SBI-087/SBI-087/SBI-087 + MTX | 41                  | 57.9             | 7.8                           | 5.5        | 1.4      |           |
|                                  | Pbo/Pbo/Pbo + MTX             | 40                  | 52               | 7.7                           | 5.5        | 1.4      |           |
| Aletaha 2017 (SIRROUND-T) [2, 3] | Placebo ± csDMARDs            | 294                 | 55.4             | 12.25                         | 5.84       | 1.57     |           |
|                                  | SKM 50mg Q4W ± csDMARDs       | 292                 | 55.8             | 12.85                         | 5.94       | 1.65     |           |
|                                  | SKM 100mg Q2W ± csDMARDs      | 292                 | 55               | 12.27                         | 5.87       | 1.61     |           |
| Buckley ACR 2018 [5, 6]          | Placebo + MTX                 | 37                  | 50               |                               |            |          |           |
|                                  | OTM 22.5mg + MTX              | 37                  | 48.4             |                               |            |          |           |
|                                  | OTM 45mg + MTX                | 37                  | 52.8             |                               |            |          |           |
|                                  | OTM 90mg + MTX                | 37                  | 52.7             |                               |            |          |           |
|                                  | OTM 135mg + MTX               | 37                  | 47.1             |                               |            |          |           |
|                                  | OTM 180mg + MTX               | 37                  | 52.3             |                               |            |          |           |
| Bi 2018 (RAPID-C) [7]            | Placebo + MTX                 | 113                 | 47.1             | 6.6                           | 6.6        |          |           |
|                                  | CZP + MTX                     | 316                 | 48.2             | 7                             | 6.7        |          |           |
| Takeuchi 2016 (RA0083) [8]       | Placebo + MTX                 | 29                  | 52.6             | 6.5                           | 5.3        | 1.13     |           |
|                                  | OKZ 60mg Q4W + MTX            | 32                  | 53.9             | 7.6                           | 5.5        | 1.19     |           |
|                                  | OKZ 120mg Q4W + MTX           | 32                  | 55.7             | 6.9                           | 5.2        | 1.25     |           |
|                                  | OKZ 240mg Q4W + MTX           | 36                  | 56.7             | 6.9                           | 5.3        | 0.88     |           |

|                                               |                                                 |     |      |      |     |      |      |
|-----------------------------------------------|-------------------------------------------------|-----|------|------|-----|------|------|
| Smolen 2017a [9]                              | Placebo + MTX                                   | 55  | 51.1 | 8.5  | 6.1 | 1.7  |      |
|                                               | UKM 90mg Q8W + MTX                              | 55  | 50.8 | 5.6  | 6   | 1.8  |      |
|                                               | UKM 90mg Q12W + MTX                             | 55  | 51.4 | 6.8  | 6.1 | 1.7  |      |
|                                               | GKM 50mg Q8W + MTX                              | 55  | 49.9 | 6.1  | 6.1 | 1.7  |      |
|                                               | GKM 200mg Q8W + MTX                             | 54  | 54.6 | 8.9  | 6.1 | 1.8  |      |
| Burmester 2017b<br>(EARTH EXPLORER 1)<br>[10] | MVM 150mg Q2W + MTX                             | 79  | 52.6 | 8.5  | 5.7 | 1.58 |      |
|                                               | MVM 100mg Q2W + MTX                             | 85  | 50.8 | 7.2  | 5.9 | 1.58 |      |
|                                               | MVM 30mg Q2W + MTX                              | 81  | 51.2 | 7.8  | 5.7 | 1.52 |      |
|                                               | Placebo + MTX                                   | 81  | 52.8 | 7.6  | 5.8 | 1.63 |      |
| Dorner 2017 [11]                              | VBM 150mg Q4W                                   | 62  |      |      |     |      |      |
|                                               | VBM 150mg Q2W                                   | 62  |      |      |     |      |      |
|                                               | VBM 225mg Q2W                                   | 63  |      |      |     |      |      |
|                                               | (Open-Label) TCZ 162mg Q1W                      | 60  |      |      |     |      |      |
| Weinblatt 2017 [12]                           | Placebo + MTX                                   | 69  |      |      |     |      |      |
|                                               | VBM 75mg Q4W + MTX                              | 69  |      |      |     |      |      |
|                                               | VBM 150mg Q4W + MTX                             | 70  |      |      |     |      |      |
|                                               | VBM 150mg Q2W                                   | 68  |      |      |     |      |      |
|                                               | VBM 225mg Q2W                                   | 69  |      |      |     |      |      |
| Fleischmann 2017<br>(TARGET) [13]             | Placebo + csDMARDs                              | 181 | 51.9 | 12   | 6.2 | 1.8  |      |
|                                               | SLM 150mg Q2W + csDMARDs                        | 181 | 54   | 11.6 | 6.1 | 1.7  |      |
|                                               | SLM 200mg Q2W + csDMARDs                        | 184 | 52.9 | 12.7 | 6.3 | 1.8  |      |
| Tahir 2017 (REASSURE)<br>[14]                 | SEC 3x10mg/kg i.v. Q2W /150mg<br>s.c. Q4W ± MTX | 213 | 53.2 | 9    | 4.9 | 1.7  | 48.1 |
|                                               | SEC 3x10mg/kg i.v. Q2W /75mg<br>s.c. Q4W ± MTX  | 210 | 53.3 | 8.4  | 4.9 | 1.7  | 55   |
|                                               | Placebo ± MTX                                   | 214 | 52.2 | 7.8  | 4.8 | 1.7  | 57.7 |
| Takeuchi 2017<br>(SIRROUND-D) [15]            | Placebo + csDMARD                               | 556 | 52.9 | 8.3  | 5.9 | 1.6  | 41.9 |
|                                               | SKM 50mg Q4W + csDMARD                          | 557 | 52.9 | 8.7  | 5.9 | 1.5  | 41.8 |
|                                               | SKM 100mg Q2W + csDMARD                         | 557 | 53   | 8.8  | 5.8 | 1.5  | 42.5 |
| Mease 2018 [16]                               | Placebo + MTX                                   | 51  | 49.8 | 5.4  | 4.9 | 1.6  |      |

|                                      |                                       |     |      |      |      |      |      |
|--------------------------------------|---------------------------------------|-----|------|------|------|------|------|
|                                      | CNTO6785 15mg Q4W + MTX               | 52  | 49.5 | 3.5  | 4.9  | 1.4  |      |
|                                      | CNTO6785 50mg Q4W + MTX               | 51  | 52.3 | 4.7  | 4.9  | 1.5  |      |
|                                      | CNTO6785 100mg Q4W + MTX              | 51  | 52.3 | 5.1  | 5    | 1.5  |      |
|                                      | CNTO6785 200mg Q4W + MTX              | 52  | 52.9 | 5.8  | 5    | 1.4  |      |
| Tanaka 2018b<br>(KAKEHASI) [17, 18]  | Placebo + MTX                         | 82  | 53.4 |      |      |      |      |
|                                      | SLM 150mg Q2W + MTX                   | 81  | 56.1 |      |      |      |      |
|                                      | SLM 200mg Q2W + MTX                   | 80  | 55.3 |      |      |      |      |
| van Vollenhoven 2018<br>[19]         | Placebo + MTX                         | 79  | 53.9 | 7.09 | 6.66 | 1.65 |      |
|                                      | TLM 25mg + MTX                        | 80  | 53.7 | 7.08 | 6.64 | 1.59 |      |
|                                      | TLM 100mg + MTX                       | 78  | 48.9 | 7.58 | 6.46 | 1.48 |      |
|                                      | TLM 200mg + MTX                       | 76  | 52.8 | 7.78 | 6.57 | 1.53 |      |
| Dokoupilova 2018<br>(REASSURE2) [20] | SEC 150mg + csDMARDs                  | 81  | 55.1 | 10.7 | 5.7  | 1.6  |      |
|                                      | SEC 75mg + csDMARDs                   | 80  | 53.2 | 10.8 | 5.6  | 1.6  |      |
|                                      | Placebo + csDMARDs                    | 81  | 54.2 | 10.5 | 5.7  | 1.6  |      |
| Takeuchi 2018a [21]                  | SKM 50mg Q4W + csDMARDs               | 61  | 55.4 | 5    | 5.6  | 1.4  |      |
|                                      | SKM 100mg Q2W + csDMARDs              | 61  | 54.7 | 6.3  | 5.9  | 1.1  |      |
| Mazurov 2018 [22]                    | BCD-020 + MTX                         | 107 |      |      |      |      |      |
|                                      | Placebo + MTX                         | 52  |      |      |      |      |      |
| Matsubara 2018 [23]                  | ABA ± 500mg/750mg/1000mg<br>Q4W + MTX | 203 | 56.6 | 1.78 | 4.9  | 1    | 11.3 |
|                                      | Placebo + MTX                         | 202 | 54.8 | 1.74 | 4.7  | 0.9  | 10.7 |

Table S2.3: Baseline characteristics of bDMARD Head-to-Head trials.

| Study                                  | Treatment                                   | No. of patients (n) | Mean age (years) | Mean disease duration (years) | Mean DAS28 | Mean CDAI | Mean HAQ | Mean mTSS |
|----------------------------------------|---------------------------------------------|---------------------|------------------|-------------------------------|------------|-----------|----------|-----------|
| Porter 2016 (ORBIT) [24]               | Anti-CD20 (RTX)                             | 144                 | 57               | 0.66                          | 6.2        |           | 1.7      |           |
|                                        | TNFi (ETA/ADA)                              | 151                 | 57               | 0.56                          | 6.2        |           | 1.8      |           |
| Burmester 2017 (MONARCH) [25, 26]      | ADA 40mg Q2W                                | 185                 | 53.6             | 6.6                           | 6          |           | 1.6      |           |
|                                        | SLM 200mg Q2W                               | 184                 | 50.9             | 8.1                           | 6          |           | 1.6      |           |
| Blanco 2017 (NURTURE 1) [27]           | SEC 10mg/kg i.v. + 150mg s.c. Q4W + csDMARD | 137                 | 55.9             | 9.5                           | 5.9        |           | 1.7      |           |
|                                        | SEC 10mg/kg i.v. + 75mg s.c. Q4W + csDMARD  | 138                 | 54.9             | 10.2                          | 5.7        |           | 1.7      |           |
|                                        | ABA 500/750/1000mg + csDMARD                | 138                 | 51.6             | 10.2                          | 5.7        |           | 1.7      |           |
|                                        | Placebo + csDMARD                           | 138                 | 55.5             | 10.3                          | 5.8        |           | 1.8      |           |
| Weinblatt 2018 (EARTH EXPLORER 2) [28] | MVM 100mg Q2W + MTX                         | 70                  | 50.2             | 5.8                           | 5.8        |           | 1.6      |           |
|                                        | GLM 50mg Q4W                                | 68                  | 49.9             | 7.6                           | 5.7        |           | 1.6      |           |
| Genovese 2018b [29]                    | ADA 40mg Q2W + MTX                          | 56                  | 57.6             | 7.6                           | 5.8        |           |          |           |
|                                        | ABT-122 60mg Q2W + MTX                      | 55                  | 55.2             | 7                             | 6          |           |          |           |
|                                        | ABT-122 120mg Q2W + MTX                     | 56                  | 53.5             | 9.4                           | 5.6        |           |          |           |
|                                        | ABT-122 120mg QW + MTX                      | 55                  | 55.6             | 6.8                           | 5.7        |           |          |           |
| Taylor 2018 (SIRROUND-H) [30]          | ADA 40mg Q2W                                | 186                 | 52.6             | 4                             | 6.05       |           | 1.7      |           |
|                                        | SKM 50mg Q4W                                | 186                 | 52.5             | 4.24                          | 6.12       |           | 1.75     |           |
|                                        | SKM 100mg Q2W                               | 187                 | 49.8             | 4.6                           | 6.08       |           | 1.62     |           |
| Smolen 2016 (EXXELERATE) [31]          | CZP 400/200mg Q2W + MTX                     | 454                 | 53.5             | 6                             | 6.5        | 38.1      | 1.5      |           |
|                                        | ADA 40mg Q2W + MTX                          | 454                 | 52.9             | 5.8                           | 6.5        | 39.2      | 1.5      |           |

Table S2.4: Baseline characteristics of trials investigating switching between different bDMARDs.

| Study                           | Treatment                                           | No. of patients (n) | Mean age (years) | Mean disease duration (years) | Mean DAS28 | Mean CDAI | Mean HAQ | Mean mTSS |
|---------------------------------|-----------------------------------------------------|---------------------|------------------|-------------------------------|------------|-----------|----------|-----------|
| Gottenberg 2016 (ROC) [32]      | Non-TNFi (ABA; RTX; TCZ)                            | 146                 | 58.2             | 10                            | 4.8        |           | 1.3      |           |
|                                 | TNFi (ADA; CZP; ETA; GOL; INF)                      | 146                 | 55.9             | 11                            | 4.7        |           | 1.3      |           |
| Smolen 2016 (EXXELERATE) [31]   | CZP primary non-responders switched to ADA          | 65                  | 53               | 6.1                           | 6.5        | 38.8      | 1.6      |           |
|                                 | ADA primary non-responders switched to CZP          | 57                  |                  |                               | 6.3        | 38.0      | 1.5      |           |
| Verschuieren 2018 (EXTEND) [33] | TCZ 4mg/kg non-responders; SAR 200mg Q2W + csDMARDs | 37                  |                  |                               |            |           |          |           |
|                                 | TCZ 4mg/kg responders; SAR 200mg Q2W + csDMARDs     |                     |                  |                               |            |           |          |           |
|                                 | TCZ 8mg/kg non-responders; SAR 200mg Q2W + csDMARDs | 56                  |                  |                               |            |           |          |           |
|                                 | TCZ 8mg/kg responders; SAR 200mg Q2W + csDMARDs     |                     |                  |                               |            |           |          |           |

Table S2.5: Baseline characteristics of bDMARD induction vs. csDMARD induction trials in early RA.

| Study                              | Treatment                                    | No. of patients (n)                | Mean age (years) | Mean disease duration (years) | Mean DAS28       | Mean HAQ         | Mean mTSS        |
|------------------------------------|----------------------------------------------|------------------------------------|------------------|-------------------------------|------------------|------------------|------------------|
| Emery 2017 (C-EARLY) [34]          | Placebo + MTX                                | 213                                | 51.2             | 0.24                          | 6.8              | 1.7              | 8.5              |
|                                    | CZP 200mg Q4W + MTX                          | 655                                | 50.4             | 0.24                          | 6.7              | 1.6              | 7.2              |
| Emery ACR 2018 (AVERT-2) [35]      | ABA 125mg QW + MTX                           | 225 <sup>a</sup> /451 <sup>b</sup> | 50 <sup>a</sup>  | 0.11 <sup>a</sup>             | 5.7 <sup>a</sup> | 1.6 <sup>a</sup> | 9.8 <sup>b</sup> |
|                                    | Placebo + MTX                                | 150 <sup>a</sup> /301 <sup>b</sup> | 50 <sup>a</sup>  | 0.11 <sup>a</sup>             | 5.6 <sup>a</sup> | 1.6 <sup>a</sup> | 13 <sup>b</sup>  |
| Stamm 2018 (DINORA) [36]           | INF (3mg/kg wk0, 2, 6; INF 4mg/kg Q8W) + MTX | 36                                 | 52.1             | 0.2                           | 5                | 0.9              | 2.8              |
|                                    | Placebo + MTX                                | 36                                 | 52.9             | 0.18                          | 4.8              | 0.9              | 3                |
|                                    | Placebo                                      | 16                                 | 54.4             | 0.19                          | 4.7              | 0.7              | 4.6              |
| Burmester 2016 (FUNCTION) [37, 38] | Placebo + MTX                                | 287                                | 49.6             | 0.4                           | 6.6              | 1.48             | 5.66             |
|                                    | TCZ 4mg/kg Q4W + MTX                         | 288                                | 51.2             | 0.4                           | 6.7              | 1.62             | 7.72             |
|                                    | TCZ 8mg/kg Q4W + MTX                         | 290                                | 49.5             | 0.5                           | 6.7              | 1.5              | 6.17             |
|                                    | TCZ 8mg/kg Q4W + Placebo                     | 292                                | 49.9             | 0.5                           | 6.7              | 1.58             | 6.85             |

<sup>a</sup> week 24; <sup>b</sup> week 52;



Table S2.6: Baseline characteristics studies investigating strategic studies.

| Study                                  | Treatment                          | No. of patients (n) | Mean age (years) | Mean disease duration (years) | Mean DAS28 | Mean CDAI | Mean HAQ | Mean mTSS |
|----------------------------------------|------------------------------------|---------------------|------------------|-------------------------------|------------|-----------|----------|-----------|
| Møller-Bisgaard 2019 (IMAGINE-RA) [39] | MRI treat-to-target                | 100                 | 62.7             | 9                             | 2          |           | 0.44     | 20        |
|                                        | Conventional treat-to-target       | 100                 | 60.55            | 11                            | 1.9        |           | 0        | 15        |
| Mueller 2019 [40]                      | CZP + treat-to-target csDMARDs/GCs | 21                  | 56.3             | 0.99                          | 5.89       |           | 0.84     |           |
|                                        | CZP + fixed regimen                | 22                  | 56.8             | 0.85                          | 6.16       |           | 0.85     |           |

Table S2.7: Baseline characteristics studies investigating tapering of DMARDs.

If available, characteristics of the timepoint before treatment discontinuation/tapering are shown.

| Study                                      | Treatment                               | No. of patients (n) | Mean age (years) | Mean disease duration (years) | Mean DAS28 | Mean CDAI | Mean HAQ | Mean mTSS |
|--------------------------------------------|-----------------------------------------|---------------------|------------------|-------------------------------|------------|-----------|----------|-----------|
| Oba 2017 / Tanaka ACR 2018 (RRRR) [41, 42] | INF 3/8/10mg/kg programmed Q8W          | 170                 | 58               |                               | 4.2        |           | 1        |           |
|                                            | INF standard 3mg/kg Q8W                 | 167                 | 59               |                               | 4.1        |           | 1        |           |
| Chatzidionysiou 2016 (ADMIRE)* [43]        | ADA + MTX continuation                  | 16                  | 56               | 7.6                           | 2.13       |           |          | 0.13      |
|                                            | ADA discontinuation; MTX monotherapy    | 16                  | 64               | 10.4                          | 1.69       |           |          | 0.38      |
| Moghadam 2016/2018 (POET) [44] [45]        | Stopping TNFi                           | 531                 | 60               | 12                            | 1.98       |           | 0.6      |           |
|                                            | Continuation of TNFi                    | 286                 | 59.7             | 11.1                          | 2.05       |           | 0.59     |           |
| Emery 2019 (AVERT) [46]                    | ABA + MTX continuation                  | 84                  | 47.1             | 0.58                          | 5.4        |           |          | 1.4       |
|                                            | ABA monotherapy                         | 66                  | 44.5             | 0.64                          | 5.4        |           |          | 1.3       |
|                                            | MTX monotherapy                         | 73                  | 49               | 0.47                          | 5.3        |           |          | 1.3       |
| Atsumi 2017 (C-OPERA) [47]                 | CZP + MTX continuation                  | 108                 | 48.8             | 4.4                           | 5.2        |           | 1.04     | 3.8       |
|                                            | Stopping CZP; MTX + PLC                 | 71                  | 48.6             | 4.4                           | 5.1        |           | 0.79     | 3.2       |
| Kaneko 2018 (SURPRISE) [48]                | stopping TCZ; MTX monotherapy           | 49                  | 57.5             | 3.6                           | 1.4        |           |          | 0.32      |
|                                            | stopping TCZ; No DMARD                  | 53                  | 54.4             | 3.5                           | 1.4        |           |          | 0.31      |
| Weinblatt 2017 (C-EARLY) [49]              | CZP 200mg Q2W + MTX (standard)          | 84                  | 49.1             | 0.21                          | 2          | 2.2       | 0.3      | 3.3       |
|                                            | CZP 200mg Q4W + MTX (reduced frequency) | 126                 | 49.2             | 0.22                          | 2          | 2.2       | 0.3      | 4.5       |
|                                            | Placebo + MTX (CZP stopped)             | 79                  | 47.6             | 0.24                          | 1.9        | 1.6       | 0.3      | 5         |
|                                            | Placebo + MTX (MTX responders)          | 66                  | 51.2             | 0.26                          | 2.2        | 2.6       | 0.4      | 6.8       |
| Ibrahim 2017 (OPTIRRA) [50]                | TNFi 33% tapering                       | 26                  | 59               | 11.2                          | 2.3        |           | 0.75     |           |
|                                            | TNFi 66% tapering                       | 21                  | 58               | 10.6                          | 2.2        |           | 0.38     |           |

|                                     |                                                        |     |      |      |                  |      |      |      |
|-------------------------------------|--------------------------------------------------------|-----|------|------|------------------|------|------|------|
|                                     | Controls                                               | 50  | 56   | 11.9 | 2.1              |      | 0.5  |      |
| Akdemir 2018 (IMPROVED) [51]        | Overall IMPROVED study population                      | 610 | 52   | 0.34 | 3.2              |      | 1.2  | 2.1  |
|                                     | Arm 1 (csDMARD + GC Start) at randomization (4 months) | 83  |      |      | 2.5              |      | 0.85 |      |
|                                     | Arm 2 (ADA Start) at randomization (4 months)          | 78  |      |      | 2.6              |      | 0.88 |      |
| El Miedany 2016 [52]                | bDMARD tapering -50%, csDMARDs unchanged               | 31  |      |      | 1.97             |      |      |      |
|                                     | csDMARD + bDMARD -50%                                  | 32  |      |      | 2.1              |      |      |      |
|                                     | stop bDMARD, reduce csDMARD -50%                       | 31  |      |      | 2.1              |      |      |      |
|                                     | stop bDMARD+csDMARD                                    | 31  |      |      | 2.04             |      |      |      |
|                                     | continue bDMARD+csDMARD                                | 32  |      |      | 2.2              |      |      |      |
| Van Mulligen EULAR 2018 (TARA) [53] | Tapering csDMARDs                                      | 93  | 55.8 | 6    | 1.1 <sup>a</sup> |      | 0.52 |      |
|                                     | Tapering TNFi                                          | 94  | 57.1 | 6.2  | 1 <sup>a</sup>   |      | 0.47 |      |
| Kaeley 2016 (MUSICA) [54]           | ADA 40mg Q2W + 7.5 mg MTX                              | 154 | 55.1 | 5.9  | 0.92             | 40.6 | 1.45 |      |
|                                     | ADA 40mg Q2W + 20 mg MTX                               | 155 | 54.5 | 4.7  | 0.96             | 41.3 | 1.47 |      |
| Keystone 2016 (CAMEO) [55]          | ETA 50mg QW; MTX discontinuation                       | 98  | 54.3 | 9    | 3.44             | 13   | 1.3  | 37.9 |
|                                     | ETA 50mg QW + MTX continuation                         | 107 | 54.4 | 9.3  | 3.55             | 12.9 | 1.5  | 38.2 |
| Pope EULAR 2017/ACR 2018 [56, 57]   | CZP + csDMARD continuation                             | 37  | 58.4 |      | 5.4              |      |      |      |
|                                     | CZP + csDMARD discontinuation                          | 44  | 54.2 |      | 5                |      |      |      |
| Burmester ACR 2018 (SEMIRA) [58]    | TCZ ± csDMARDs; Glucocorticoid tapering                | 131 |      | 9.2  | 1.9              |      |      |      |
|                                     | TCZ ± csDMARDs; Glucocorticoid continuation            | 128 |      | 9.2  | 1.9              |      |      |      |
| Pablos 2018 (JUST-ACT) [59]         | TCZ 8 mg/kg + MTX                                      | 82  | 50.2 | 5.8  | 1.8              |      | 0.5  |      |
|                                     | TCZ 8 mg/kg + PBO                                      | 82  | 51   | 6.4  | 2                |      | 0.7  |      |
| Kremer 2018 (COMP-ACT) [60]         | TCZ 162mg s.c. + PLC                                   | 147 | 54.6 | 6.8  | 6.2              | 37.3 | 1.3  |      |
|                                     | TCZ 162mg s.c. + MTX                                   | 147 | 56.4 | 6.8  | 6.3              | 39.1 | 1.4  |      |

|                                                                     |                                  |     |      |      |      |                  |      |      |
|---------------------------------------------------------------------|----------------------------------|-----|------|------|------|------------------|------|------|
| Edwards 2018 (ACT-TAPER) [61]                                       | TCZ 8mg/kg Q4W + PBO             | 136 | 54.4 | 7.9  | 6.58 |                  |      |      |
|                                                                     | TCZ 8mg/kg Q4W + MTX             | 136 | 56.4 | 7.2  | 6.61 |                  |      |      |
| Urata EULAR 2016 (r-T4) [63]                                        | Standard care                    | 56  | 60.8 | 4.9  |      | 2.2 <sup>b</sup> | 0    | 48.4 |
|                                                                     | SDAI guided tapering             | 54  | 65.4 | 5.5  |      | 2.6 <sup>b</sup> | 0    | 42.7 |
|                                                                     | MMP-3 guided tapering            | 57  | 64.5 | 4.2  |      | 2.6 <sup>b</sup> | 0    | 51.7 |
|                                                                     | SDAI + MMP-3 guided tapering     | 56  | 62.8 | 3.3  |      | 2.4 <sup>b</sup> | 0    | 39   |
| Bouman 2017 (DRESS) [64]                                            | TNFi dose reduction extension    | 115 | 60.9 | 11   | 2.7  |                  |      |      |
|                                                                     | Usual care extension             | 57  | 59.7 | 12   | 2.5  |                  |      |      |
|                                                                     | TNFi dose reduction intervention | 115 | 59   | 10   | 2.5  |                  |      | 21   |
|                                                                     | Usual care intervention          | 57  | 58   | 10   | 2.5  |                  |      | 19   |
| L'Ami 2018 [65]                                                     | ADA 40mg Q3W ± MTX               | 27  | 60   | 11   | 2    | 3.4              | 0.4  |      |
|                                                                     | ADA 40mg Q2W ± MTX               | 27  | 58   | 11   | 1.6  | 3.4              | 0.5  |      |
| Takeuchi 2019 (RA-BEYOND) [76]                                      | Continued BARI 4mg ± csDMARD     | 281 | 54.5 | 9.5  | 2.03 | 3.64             | 0.52 |      |
|                                                                     | BARI Step-down 2mg ± csDMARD     | 278 | 53.6 | 9.3  | 2.02 | 3.64             | 0.53 |      |
| Stouten 2018 (CareRA) [62]                                          | COBRA Avant Garde->MTX 15mg/week | 32  | 51.1 | 0.06 | 4.7  |                  | 1    | 1    |
|                                                                     | COBRA Avant Garde->LEF 20mg/d    | 26  |      |      |      |                  |      |      |
| * numbers reported as median; <sup>a</sup> DAS44; <sup>b</sup> SDAI |                                  |     |      |      |      |                  |      |      |

Table S2.8: Baseline characteristics studies investigating tsDMARDs ± csDMARDs versus placebo ± csDMARDs.

| Study                 | Treatment               | No. of patients (n) | Mean age (years) | Mean disease duration (years) | Mean DAS28 | Mean CDAI | Mean HAQ | Mean mTSS |
|-----------------------|-------------------------|---------------------|------------------|-------------------------------|------------|-----------|----------|-----------|
| Fleischmann 2015 [66] | Placebo                 | 41                  | 54.9             | 10.6                          | 6.0        |           | 1.6      |           |
|                       | DEC 25mg BID            | 41                  | 56.8             | 9.5                           | 6.2        |           | 1.7      |           |
|                       | DEC 50mg BID            | 41                  | 55.6             | 11.3                          | 6.2        |           | 1.6      |           |
|                       | DEC 100mg BID           | 40                  | 56.5             | 8.9                           | 6.0        |           | 1.6      |           |
|                       | DEC 150mg BID           | 41                  | 57               | 9.3                           | 6.1        |           | 1.7      |           |
| Genovese 2016c [67]   | Placebo + csDMARD       | 12                  | 52.8             | 12.3                          | 6.3        |           |          |           |
|                       | DEC 100mg BID + csDMARD | 11                  | 56.7             | 6.5                           | 5.4        |           |          |           |
|                       | DEC 200mg BID + csDMARD | 10                  | 50.5             | 11.9                          | 5.8        |           |          |           |
|                       | DEC 300mg BID + csDMARD | 10                  | 54.9             | 5                             | 6.1        |           |          |           |
| Genovese 2016b [68]   | Placebo + MTX           | 71                  | 52.7             | 13.2                          | 7.2        |           | 1.7      |           |
|                       | DEC 100mg OD + MTX      | 71                  | 53.5             | 11.3                          | 6.5        |           | 1.5      |           |
|                       | DEC 150mg OD + MTX      | 72                  | 50.1             | 11.8                          | 8.1        |           | 1.2      |           |
|                       | DEC 200mg OD + MTX      | 72                  | 53.2             | 13.2                          | 7.2        |           | 1.5      |           |
|                       | DEC 100mg BID + MTX     | 72                  | 55.7             | 12.2                          | 7.7        |           | 1.6      |           |
| Takeuchi 2016a [69]   | Placebo                 | 56                  | 54.2             | 12.1                          | 5.1        |           | 0.9      |           |
|                       | PEF 25mg OD             | 55                  | 52.9             | 9.5                           | 5.3        |           | 0.9      |           |
|                       | PEF 50mg OD             | 57                  | 54.2             | 11.6                          | 5.26       |           | 0.9      |           |
|                       | PEF 100mg OD            | 55                  | 52.1             | 12.1                          | 5.34       |           | 1.0      |           |
|                       | PEF 150mg OD            | 58                  | 51.6             | 12.1                          | 5.41       |           | 1.0      |           |
| Genovese 2017c [70]   | Placebo + HCQ/SZP       | 51                  | 52.7             | 9.8                           | 5.9        | 40.8      | 1.6      |           |
|                       | PEF 25mg + HCQ/SZP      | 59                  | 52.6             | 10.4                          | 5.8        | 40.8      | 1.4      |           |
|                       | PEF 50mg + HCQ/SZP      | 57                  | 54.8             | 10.3                          | 5.9        | 42        | 1.6      |           |
|                       | PEF 100mg + HCQ/SZP     | 58                  | 54.9             | 11                            | 5.7        | 40.4      | 1.4      |           |

|                                     |                         |     |      |      |      |      |      |    |
|-------------------------------------|-------------------------|-----|------|------|------|------|------|----|
|                                     | PEF 150mg + HCO/SZP     | 64  | 54.4 | 10.5 | 5.9  | 41.6 | 1.5  |    |
| Kivitz 2017 [71]                    | Placebo + MTX           | 72  | 52.6 | 7.2  | 5.4  | 36   | 1.4  |    |
|                                     | PEF 25mg + MTX          | 66  | 52.8 | 8.1  | 5.5  | 37.6 | 1.4  |    |
|                                     | PEF 50mg + MTX          | 78  | 52.3 | 8    | 5.6  | 37.8 | 1.3  |    |
|                                     | PEF 100mg + MTX         | 84  | 54.5 | 7.5  | 5.6  | 39.4 | 1.3  |    |
|                                     | PEF 150mg + MTX         | 78  | 54.2 | 7.3  | 5.6  | 38.8 | 1.3  |    |
| Tanaka ACR 2018a [72, 73]           | Placebo ± csDMARDs      | 101 |      |      |      |      |      |    |
|                                     | PEF 100mg OD ± csDMARDs | 104 |      |      |      |      |      |    |
|                                     | PEF 150mg OD ± csDMARDs | 102 |      |      |      |      |      |    |
|                                     | ETA 50mg QW ± csDMARDs  | 200 |      |      |      |      |      |    |
| Takeuchi ACR 2018 [74, 75]          | Placebo + MTX           | 170 |      |      |      |      |      |    |
|                                     | PEF 100mg OD + MTX      | 174 |      |      |      |      |      |    |
|                                     | PEF 150mg OD + MTX      | 174 |      |      |      |      |      |    |
| Westhovens 2017 (DARWIN 1) [76, 79] | Placebo + MTX           | 86  | 52   | 8    | 5.98 | 42   | 1.7  |    |
|                                     | FILGO 50mg OD + MTX     | 82  | 53   | 7    | 6.08 | 41   | 1.7  |    |
|                                     | FILGO 100mg OD + MTX    | 85  | 52   | 8    | 6.14 | 43   | 1.7  |    |
|                                     | FILGO 200mg OD + MTX    | 86  | 55   | 9    | 6.22 | 43   | 1.8  |    |
|                                     | FILGO 25mg BID + MTX    | 86  | 52   | 9    | 6.05 | 41   | 1.7  |    |
|                                     | FILGO 50mg BID + MTX    | 85  | 55   | 8    | 6.1  | 42   | 1.8  |    |
|                                     | FILGO 100mg BID+ MTX    | 84  | 54   | 10   | 6.14 | 42   | 1.8  |    |
| Kavanaugh 2017 (DARWIN 2) [77, 79]  | Placebo                 | 72  | 52   | 10   | 6.22 | 42   | 1.8  |    |
|                                     | FILGO 50mg OD           | 72  | 52   | 9    | 6.03 | 41   | 1.8  |    |
|                                     | FILGO 100mg OD          | 70  | 53   | 9    | 6.18 | 44   | 1.8  |    |
|                                     | FILGO 200mg OD          | 69  | 52   | 9    | 6.09 | 42   | 1.8  |    |
| Kivitz ACR 2018 [80]                | Placebo + MTX           | 22  | 54   |      | 5.51 |      | 1.5  |    |
|                                     | GS-9876 10mg OD + MTX   | 20  | 56   |      | 5.65 |      | 1.5  |    |
|                                     | GS-9876 30mg OD + MTX   | 20  | 58   |      | 5.78 |      | 1.4  |    |
| Dougados 2017 (RA-BUILD) [84, 85]   | Placebo + csDMARD       | 228 | 51   | 7    | 5.5  | 36   | 1.5  | 19 |
|                                     | BARI 2mg + csDMARD      | 229 | 52   | 8    | 5.6  | 37   | 1.51 | 26 |

|                                                      |                                         |     |      |      |      |      |      |      |
|------------------------------------------------------|-----------------------------------------|-----|------|------|------|------|------|------|
|                                                      | BARI 4mg + csDMARD                      | 227 | 52   | 8    | 5.6  | 36   | 1.55 | 24   |
| Schiff/Fleischmann<br>2017b (RA-BEGIN)<br>[86, 87]   | Placebo + MTX                           | 210 | 51   | 1.3  | 5.9  | 39   | 1.7  | 11.8 |
|                                                      | BARI 4mg + Placebo                      | 159 | 51   | 1.9  | 5.9  | 40   | 1.6  | 13.3 |
|                                                      | BARI 4mg + MTX                          | 215 | 49   | 1.3  | 5.9  | 40   | 1.6  | 11.4 |
| Smolen 2017d (RA-<br>BEACON) [88]                    | Placebo + csDMARD                       | 176 | 56   | 14   | 5.9  | 41   | 1.78 |      |
|                                                      | BARI 2mg + csDMARD                      | 174 | 55   | 14   | 6    | 43   | 1.71 |      |
|                                                      | BARI 4mg + csDMARD                      | 177 | 56   | 14   | 5.9  | 40   | 1.74 |      |
| Hu/Yue 2018 (RA-<br>BALANCE) [91, 92]                | Placebo + MTX                           | 145 | 48.9 | 9.1  |      |      | 1.52 |      |
|                                                      | BARI 4mg + MTX                          | 145 | 49.5 | 10.7 |      |      | 1.59 |      |
| Tanaka 2019 [82]                                     | TOFA 11mg modified-release<br>OD + MTX  | 104 | 57.1 | 9.5  | 5.1  |      | 1    |      |
|                                                      | TOFA 5mg immediate-release<br>BID + MTX | 105 | 58.9 | 9.4  | 5    |      | 0.9  |      |
| van der Heijde 2019<br>(ORAL Scan) [83]              | TOFA 5mg + MTX                          | 321 | 53.7 | 8.9  | 5.22 |      | 1.41 | 31.1 |
|                                                      | TOFA 10mg + MTX                         | 316 | 52   | 9    | 5.2  |      | 1.39 | 37.3 |
|                                                      | Placebo->TOFA 5mg + MTX                 | 81  | 53.2 | 8.8  | 5.14 |      | 1.4  | 35   |
|                                                      | Placebo->TOFA 10mg + MTX                | 79  | 52.1 | 9.5  | 5.18 |      | 1.23 | 30.1 |
| Tanaka 2018a<br>(SELECT-SUNRISE)<br>[89]             | Placebo + csDMARDs                      | 49  |      |      |      |      |      |      |
|                                                      | UPA 7.5mg + csDMARDs                    | 49  |      |      |      |      |      |      |
|                                                      | UPA 15mg + csDMARDs                     | 49  |      |      |      |      |      |      |
|                                                      | UPA 30mg + csDMARDs                     | 50  |      |      |      |      |      |      |
| Genovese/Strand<br>2018 (SELECT-<br>BEYOND) [93, 94] | Placebo + csDMARD                       | 169 | 57.6 | 14.5 | 5.8  | 41   | 1.6  |      |
|                                                      | UPA 15mg + csDMARD                      | 164 | 56.3 | 12.4 | 5.9  | 41.7 | 1.7  |      |
|                                                      | UPA 30mg + csDMARD                      | 165 | 57.3 | 12.7 | 5.8  | 40.1 | 1.6  |      |
| Burmester/Strand<br>2018 (SELECT-NEXT)<br>[95, 100]  | Placebo + csDMARD                       | 221 | 56   | 7.2  | 5.6  | 37.8 | 1.4  |      |
|                                                      | UPA 15mg + csDMARD                      | 221 | 55.3 | 7.3  | 5.7  | 38.3 | 1.5  |      |
|                                                      | UPA 30mg + csDMARD                      | 219 | 55.8 | 7.3  | 5.7  | 38.6 | 1.5  |      |
| van Vollenhoven<br>ACR 2018 (SELECT-<br>EARLY) [78]  | Placebo + MTX                           | 314 |      |      |      |      |      |      |
|                                                      | UPA 15mg + MTX                          | 317 |      |      |      |      |      |      |
|                                                      | UPA 30mg + MTX                          | 314 |      |      |      |      |      |      |

|                                                              |               |     |      |     |     |      |     |  |
|--------------------------------------------------------------|---------------|-----|------|-----|-----|------|-----|--|
| Smolen EULAR/ACR<br>2018 (SELECT-<br>MONOTHERAPY)<br>[96-99] | Continued MTX | 216 | 55.3 | 5.8 | 5.6 | 37.8 | 1.5 |  |
|                                                              | UPA 15mg      | 217 | 54.5 | 7.5 | 5.6 | 38   | 1.5 |  |
|                                                              | UPA 30mg      | 215 | 53.1 | 6.5 | 5.6 | 38.4 | 1.5 |  |



Table S2.9: Baseline characteristics studies investigating Head-to-Head studies between tsDMARDs and bDMARDs.

| Study                                                         | Treatment          | No. of patients (n) | Mean age (years) | Mean disease duration (years) | Mean DAS28 | Mean CDAI | Mean HAQ | Mean mTSS |
|---------------------------------------------------------------|--------------------|---------------------|------------------|-------------------------------|------------|-----------|----------|-----------|
| Taylor/Keystone 2017 (RA-BEAM) [101, 102]                     | Placebo + MTX      | 488                 | 53               | 10                            | 5.7        | 38        | 1.55     | 45        |
|                                                               | BARI 4mg + MTX     | 487                 | 54               | 10                            | 5.8        | 38        | 1.57     | 43        |
|                                                               | ADA 40mg Q2W + MTX | 330                 | 53               | 10                            | 5.8        | 38        | 1.59     | 44        |
| Fleischmann 2017/Strand EULAR 2018 (ORAL-Strategy) [103, 106] | TOFA 5mg BID + PLC | 384                 | 49.7             | 6.1                           | 5.7        | 38.6      | 1.6      |           |
|                                                               | TOFA 5mg BID + MTX | 376                 | 50               | 5.4                           | 5.8        | 39.7      | 1.6      |           |
|                                                               | ADA 40mg Q2W + MTX | 386                 | 50.7             | 6                             | 5.7        | 38.2      | 1.6      |           |
| Fleischmann ACR 2018 (SELECT-COMPARE) [104, 105]              | Placebo + MTX      | 651                 |                  |                               |            |           |          |           |
|                                                               | UPA 15mg OD + MTX  | 651                 |                  |                               |            |           |          |           |
|                                                               | ADA 40mg Q2W + MTX | 327                 |                  |                               |            |           |          |           |

Table S2.10: Baseline characteristics of studies investigating the efficacy of boDMARDs (biooriginators) versus bsDMARDs (biosimilars).

| Study                                | Treatment | No. of patients (n) | Mean age (years) | Mean disease duration (years) | Mean DAS28 | Mean CDAI | Mean HAQ | Mean mTSS |
|--------------------------------------|-----------|---------------------|------------------|-------------------------------|------------|-----------|----------|-----------|
| Jani 2016 [108]                      | ZRC-3197  | 60                  | 45               | 3.3                           | 5.9        |           |          |           |
|                                      | ADA       | 60                  | 45               | 4                             | 6          |           |          |           |
| Denisov EULAR 2018 (LIRA) [109, 110] | BCD-055   | 198                 |                  |                               |            |           |          |           |
|                                      | INF       |                     |                  |                               |            |           |          |           |
| Wiland ACR 2018 [111]                | GP2017    | 177                 |                  |                               |            |           |          |           |
|                                      | ADA       | 176                 |                  |                               |            |           |          |           |
| Matsuno and Matsubara 2018 [112]     | NI-071    | 126                 | 54               |                               | 5.28       |           | 0.64     |           |
|                                      | INF       | 116                 | 53.7             |                               | 5.13       |           | 0.54     |           |
| Yoo 2016 (PLANETRA) [113]            | CT-P13    | 302                 | 50               |                               | 5.9        | 40.9      | 1.6      |           |
|                                      | INF       | 304                 | 50               |                               | 5.8        | 39.3      | 1.6      |           |
| Bae 2017 (HERA) [114]                | HD203     | 115                 | 51               | 7.19                          |            |           | 1.1      |           |
|                                      | ETA       | 118                 | 51.3             | 8.05                          |            |           | 1.1      |           |
| Jamshidi 2017 [115]                  | CinnoRA   | 68                  | 48.29            | 5.51                          |            |           | 1.25     |           |
|                                      | ADA       | 68                  | 47.59            | 5.47                          |            |           | 1.38     |           |
| Smolen 2017c [116]                   | GP2013    | 133                 | 54.4             | 10.5                          | 5.8        |           | 1.9      |           |
|                                      | RTX-EU    | 87                  | 52.7             | 10.8                          | 5.9        |           | 1.8      |           |
|                                      | RTX-US    | 92                  | 55               | 11.0                          | 5.9        |           | 1.9      |           |
| Choe/Smolen 2017 [117, 118]          | SB2       | 291                 | 51.6             | 6.3                           | 6.5        | 38.3      | 1.5      | 37.06     |
|                                      | INF       | 293                 | 52.6             | 6.6                           | 6.5        | 38.7      | 1.5      | 38.92     |
| Cohen 2017 [119]                     | ABP 501   | 264                 | 55.4             | 9.41                          | 5.66       |           | 1.5      |           |
|                                      | ADA       | 262                 | 56.3             | 9.37                          | 5.68       |           | 1.5      |           |

|                                       |                    |     |      |      |      |  |      |  |
|---------------------------------------|--------------------|-----|------|------|------|--|------|--|
| Alten EULAR 2017 (ARABESC) [120, 121] | FKB327             | 366 | 55.3 |      | 6.1  |  |      |  |
|                                       | ADA                | 362 |      |      |      |  |      |  |
| Apsangkar 2018 [122]                  | AdaliRel           | 85  | 42.5 |      |      |  |      |  |
|                                       | ADA                | 21  | 47.1 |      |      |  |      |  |
| Cohen 2018b [123]                     | PF-06438179/GP1111 | 324 | 52.8 | 7.3  | 6.0  |  | 1.6  |  |
|                                       | INF                | 326 | 52.8 | 6.4  | 6.0  |  | 1.6  |  |
| Haridas 2018 [124]                    | DRL-RI             | 276 |      |      |      |  |      |  |
|                                       | RTX-US             |     |      |      |      |  |      |  |
|                                       | RTX-EU             |     |      |      |      |  |      |  |
| Matucci-Cerinic 2018 (EQUIRA) [125]   | GP2015             | 186 | 55.2 | 8.79 | 5.43 |  | 1.45 |  |
|                                       | ETN                | 190 | 53.1 | 8.18 | 5.55 |  | 1.44 |  |
| Weinblatt 2018 [129]                  | SB5                | 271 | 49.8 | 5.4  | 6.5  |  | 1.3  |  |
|                                       | ADA                | 273 | 52.5 | 5.5  | 6.5  |  | 1.3  |  |
| Matsuno 2018 [126]                    | LBEC0101           | 185 | 52.8 | 7.6  | 6.13 |  | 1.3  |  |
|                                       | ETN                | 187 | 55.5 | 7.8  | 6.26 |  | 1.2  |  |
| Nasonov ACR 2016 [130]                | BCD-020            | 80  |      |      |      |  |      |  |
|                                       | RTX                | 80  |      |      |      |  |      |  |
| Fleischmann 2018 [127]                | PF-06410293        | 297 | 51.5 | 6.8  | 5.9  |  | 1.5  |  |
|                                       | ADA                | 300 | 53.3 | 6.8  | 6.1  |  | 1.7  |  |
| Park 2018 [128]                       | CT-P10             | 161 | 51.5 | 10.7 | 6.7  |  |      |  |
|                                       | RTX                | 211 | 51.8 | 9.1  | 6.7  |  |      |  |
| Cohen 2018a (VOLTAIRE) [134]          | BI 695501          | 324 | 53.7 | 7.3  | 6.6  |  | 1.5  |  |
|                                       | ADA                | 321 | 53.6 | 7.0  | 6.6  |  | 1.5  |  |
| Genovese 2017b [121, 135]             | FKB327             | 366 | 53   | 8.5  |      |  |      |  |
|                                       | ADA                | 362 | 53.6 |      |      |  |      |  |
| O'Dell 2016/2017 [107, 137]           | CHS-0214           | 256 |      |      | 5.45 |  |      |  |
|                                       | ETN                | 256 |      |      | 5.42 |  |      |  |

Table S2.11: Patient characteristics of studies investigating the efficacy of switching between boDMARDs (biooriginators) and bsDMARDs (biosimilars).

Shown are patient characteristics at baseline/at re-randomization.

| Study                             | Treatment          | No. of patients (n) | Timepoint of re-randomization | Mean age (years) | Mean disease duration (years) | Mean DAS28 | Mean CDAI | Mean HAQ |
|-----------------------------------|--------------------|---------------------|-------------------------------|------------------|-------------------------------|------------|-----------|----------|
| Smolen 2018 [131]                 | INF->SB2           | 94                  | 54                            | 53               | 6.3                           | 6.5/3.9    | 38.8/12.5 | 1.5/1.0  |
|                                   | INF->INF           | 101                 |                               | 51.5             | 6.7                           | 6.6/4.1    | 38.9/14.3 | 1.5/1.0  |
|                                   | SB2->SB2           | 201                 |                               | 51.8             | 6.3                           | 6.4/4.0    | 37.7/13.8 | 1.5/1.0  |
| Cohen 2018a (VOLTAIRE) [134]      | GP2015             | 186                 | 24                            |                  |                               |            |           |          |
|                                   | ETN                | 190                 |                               |                  |                               |            |           |          |
| Jorgensen 2017 (NOR-SWITCH) [136] | INF                | 39                  | 52                            | 59.9             | 2.7                           | 5.8        |           | 0.3      |
|                                   | CT-P13             | 39                  |                               | 60.4             | 2.2                           | 4.1        |           | 0.3      |
| O'Dell 2016/2017 [107, 137]       | CHS-0214->CHS-0214 | 224                 | 24                            |                  | 5.45                          |            |           |          |
|                                   | ETN->CHS-0214      | 220                 |                               |                  | 5.42                          |            |           |          |
| Song 2018 [138, 139]              | LBEC0101->LBEC0101 | 70                  | 52                            |                  | 3.068                         |            |           |          |
|                                   | ETN->LBEC0101      | 78                  |                               |                  | 3.161                         |            |           |          |
| Weinblatt 2018 [140]              | SB5                | 271                 | 24                            | 49.8             | 5.4                           | 6.5/3.7    |           | 1.3/0.8  |
|                                   | ADA->SB5           | 125                 |                               | 51.7             | 5.3                           | 6.5/3.7    |           | 1.4/0.9  |
|                                   | ADA->ADA           | 129                 |                               | 52.8             | 5.6                           | 6.4/3.8    |           | 1.4/0.9  |

Table S2.12: Patient characteristics of studies investigating the efficacy of csDMARDs (or combination with csDMARDs/GCs) vs. another csDMARD (or combination) or placebo.

| Study                                                      | Treatment                    | No. of patients (n) | Mean age (years) | Mean disease duration (years) | Mean DAS28 | Mean CDAI | Mean HAQ | Mean mTSS |
|------------------------------------------------------------|------------------------------|---------------------|------------------|-------------------------------|------------|-----------|----------|-----------|
| Shin 2019 [141]                                            | TAC 1.5mg OD + MTX           | 37                  | 51.1             | 6.9                           | 4.88       |           | 1        |           |
|                                                            | LEF 10mg OD + MTX            | 37                  | 55.8             | 8.7                           | 4.66       |           | 0.92     |           |
| Register ACR 2016 [142]                                    | MTX + SSZ + HCQ              | 69                  |                  | 0.83 to 2                     | 5.7 to 6   |           |          |           |
|                                                            | LEF + SSZ + HCQ              |                     |                  |                               |            |           |          |           |
|                                                            | LEF                          |                     |                  |                               |            |           |          |           |
| Verschueren/Stouten 2017; Stouten 2018 (CareRA) [143, 144] | High risk: COBRA Classic     | 98                  | 53.2             | 0.03                          | 5          |           | 1.2      | 1.3       |
|                                                            | High risk: COBRA Slim        | 98                  | 51.8             | 0.05                          | 4.8        |           | 1        | 1.3       |
|                                                            | High risk: COBRA Avant Garde | 93                  | 51.1             | 0.06                          | 4.7        |           | 1        | 1         |
|                                                            | Low risk: MTX tight step-up  | 47                  | 51               | 0.06                          | 4.6        |           | 1        | 0.7       |
|                                                            | Low risk: COBRA Slim         | 43                  | 51.4             | 0.03                          | 4.5        |           | 0.9      | 0.9       |
| Stamp 2018 [145]                                           | MTX + Folic acid 5mg/week    | 22                  | 61.9             | 9.8                           | 3.5        |           |          |           |
|                                                            | MTX + Folic acid 0.8mg/week  | 18                  | 57.2             | 9.5                           | 3.8        |           |          |           |

## Section 3: Efficacy outcomes

Table S3.1: Efficacy outcomes of trials investigating bDMARDs ± csDMARDs versus placebo.

| Study                            | Treatment                     | No. of patients (n) | Timepoint (weeks) | ACR20 (%) | ACR50 (%) | ACR70 (%) | DAS28 <2.6 (%) | ACR/EULAR Boolean rem. (%) | ΔHAQ  | ΔmTSS |
|----------------------------------|-------------------------------|---------------------|-------------------|-----------|-----------|-----------|----------------|----------------------------|-------|-------|
| Damjanov 2016 [1]                | SBI-087/Pbo/Pbo + MTX         | 43                  | 16                |           |           |           |                |                            | -0.4  |       |
|                                  | SBI-087/SBI-087/Pbo + MTX     | 42                  |                   |           |           |           |                |                            | -0.3  |       |
|                                  | SBI-087/Pbo/SBI-087 + MTX     | 43                  |                   |           |           |           |                |                            | -0.2  |       |
|                                  | SBI-087/SBI-087/SBI-087 + MTX | 41                  |                   |           |           |           |                |                            | -0.4  |       |
|                                  | Pbo/Pbo/Pbo + MTX             | 40                  |                   |           |           |           |                |                            | -0.3  |       |
| Aletaha 2017 (SIRROUND-T) [2, 3] | Placebo ± csDMARDs            | 294                 | 16                | 24        | 9         | 3         | 5.8            | 1                          | -0.12 |       |
|                                  | SKM 50mg Q4W ± csDMARDs       | 292                 |                   | 40        | 21        | 6         | 17.5           | 1.7                        | -0.25 |       |
|                                  | SKM 100mg Q2W ± csDMARDs      | 292                 |                   | 45        | 22        | 10        | 15.8           | 3.1                        | -0.32 |       |
| Buckley ACR 2018 [5, 6]          | Placebo + MTX                 | 37                  | 24                | 14        | 11        | 5         | 3              | 0                          | -0.34 |       |
|                                  | OTM 22.5mg + MTX              | 37                  |                   | 24        | 11        | 5         | 5              | 0                          | -0.32 |       |
|                                  | OTM 45mg + MTX                | 37                  |                   | 41        | 27        | 14        | 16             | 5                          | -0.41 |       |
|                                  | OTM 90mg + MTX                | 37                  |                   | 57        | 30        | 14        | 19             | 8                          | -0.43 |       |
|                                  | OTM 135mg + MTX               | 37                  |                   | 41        | 24        | 19        | 14             | 8                          | -0.42 |       |
|                                  | OTM 180mg + MTX               | 37                  |                   | 59        | 27        | 19        | 14             | 5                          | -0.54 |       |
| Bi 2018 (RAPID-C) [7]            | Placebo + MTX                 | 113                 | 24                | 23.9      | 7.1       | 2.7       | 0              |                            | -0.17 |       |
|                                  | CZP + MTX                     | 316                 |                   | 54.8      | 36.5      | 16.7      | 11.5           |                            | -0.53 |       |
| Takeuchi 2016 (RA0083)* [8]      | Placebo + MTX                 | 29                  | 12                | 21.9      | 8.6       | 3.8       | 3.4            |                            | 0     |       |
|                                  | OKZ 60mg Q4W + MTX            | 32                  |                   | 58.7      | 35.7      | 3.6       | 21.9           |                            | -0.4  |       |
|                                  | OKZ 120mg Q4W + MTX           | 32                  |                   | 62.5      | 42.1      | 22.5      | 40.6           |                            | -0.4  |       |

|                                               |                                                 |     |                                  |                   |                   |                   |                  |                  |                    |                   |
|-----------------------------------------------|-------------------------------------------------|-----|----------------------------------|-------------------|-------------------|-------------------|------------------|------------------|--------------------|-------------------|
|                                               | OKZ 240mg Q4W + MTX                             | 36  |                                  | 73.8              | 39.1              | 17.1              | 53.8             |                  | -0.4               |                   |
| Smolen 2017a [9]                              | Placebo+MTX                                     | 55  | 28                               | 40                | 14.5              | 5.5               | 43.6             |                  | -0.3               |                   |
|                                               | UKM 90mg Q8W + MTX                              | 55  |                                  | 52.7              | 22.2              | 14.8              | 66.7             |                  | -0.4               |                   |
|                                               | UKM 90mg Q12W + MTX                             | 55  |                                  | 54.5              | 14.5              | 5.5               | 60               |                  | -0.5               |                   |
|                                               | GKM 50mg Q8W + MTX                              | 55  |                                  | 38.2              | 21.8              | 5.5               | 56.4             |                  | -0.5               |                   |
|                                               | GKM 200mg Q8W + MTX                             | 54  |                                  | 44.4              | 22.2              | 7.4               | 59.3             |                  | -0.4               |                   |
| Burmester 2017b<br>(EARTH EXPLORER<br>1) [10] | MVM 150mg Q2W + MTX                             | 79  | 12 <sup>a</sup> /24 <sup>b</sup> | 50.6 <sup>b</sup> | 28.4 <sup>b</sup> | 12.3 <sup>b</sup> | 19 <sup>a</sup>  | 1.3 <sup>b</sup> | -0.37 <sup>b</sup> |                   |
|                                               | MVM 100mg Q2W + MTX                             | 85  |                                  | 61.2 <sup>b</sup> | 25.9 <sup>b</sup> | 10.6 <sup>b</sup> | 9.4 <sup>a</sup> | 1.2 <sup>b</sup> | -0.46 <sup>b</sup> |                   |
|                                               | MVM 30mg Q2W + MTX                              | 81  |                                  | 73.4 <sup>b</sup> | 40.5 <sup>b</sup> | 13.9 <sup>b</sup> | 9.9 <sup>a</sup> | 3.7 <sup>b</sup> | -0.55 <sup>b</sup> |                   |
|                                               | Placebo + MTX                                   | 81  |                                  | 24.7 <sup>b</sup> | 12.3 <sup>b</sup> | 3.7 <sup>b</sup>  | 2.5 <sup>a</sup> | 0 <sup>b</sup>   | -0.29 <sup>b</sup> |                   |
| Dörner 2017 [11]                              | VBM 150mg Q4W                                   | 62  | 12                               | 73                | 44                | 16                | 10               |                  |                    |                   |
|                                               | VBM 150mg Q2W                                   | 62  |                                  | 77                | 37                | 24                | 5                |                  |                    |                   |
|                                               | VBM 225mg Q2W                                   | 63  |                                  | 81                | 49                | 21                | 6                |                  |                    |                   |
|                                               | (Open-Label) TCZ 162mg<br>Q1W                   | 60  |                                  | 78                | 45                | 23                | 9                |                  |                    |                   |
| Weinblatt 2017<br>[12]                        | Placebo + MTX                                   | 69  | 12                               | 62                | 28                | 9                 | 16               |                  |                    |                   |
|                                               | VBM 75mg Q4W + MTX                              | 69  |                                  | 75                |                   |                   |                  |                  |                    |                   |
|                                               | VBM 150mg Q4W + MTX                             | 70  |                                  | 81                |                   |                   |                  |                  |                    |                   |
|                                               | VBM 150mg Q2W                                   | 68  |                                  | 78                |                   |                   |                  |                  |                    |                   |
|                                               | VBM 225mg Q2W                                   | 69  |                                  | 72                |                   |                   |                  |                  |                    |                   |
| Fleischmann 2017<br>(TARGET) [13]             | Placebo + csDMARDs                              | 181 | 24                               | 33.7              | 18.2              | 7.2               | 7.2              |                  | -0.3               |                   |
|                                               | SLM 150mg Q2W +<br>csDMARDs                     | 181 |                                  | 55.8              | 37                | 19.9              | 24.9             |                  | -0.5               |                   |
|                                               | SLM 200mg Q2W +<br>csDMARDs                     | 184 |                                  | 60.9              | 40.8              | 16.3              | 28.8             |                  | -0.6               |                   |
| Tahir 2017<br>(REASSURE) [14]                 | SEC 3x10mg/kg i.v. Q2W<br>/150mg s.c. Q4W ± MTX | 213 | 24                               | 35.2              | 16                | 3.8               |                  |                  | -0.4               | 0.59              |
|                                               | SEC 3x10mg/kg i.v. Q2W<br>/75mg s.c. Q4W ± MTX  | 210 |                                  | 35.2              | 17.6              | 8.1               |                  |                  | -0.4               | 0.83              |
|                                               | Placebo ± MTX                                   | 214 |                                  | 19.6              | 6.5               | 2.3               |                  |                  | -0.5               | 1.73              |
| Takeuchi 2017                                 | Placebo + csDMARD                               | 556 | 16 <sup>c</sup> /24 <sup>b</sup> | 26.4 <sup>c</sup> | 10.8 <sup>c</sup> | 4 <sup>c</sup>    | 5.6 <sup>b</sup> |                  | -0.22 <sup>b</sup> | 1.96 <sup>b</sup> |

|                                                                                                |                                  |     |       |                   |                   |                   |                   |     |                    |                   |
|------------------------------------------------------------------------------------------------|----------------------------------|-----|-------|-------------------|-------------------|-------------------|-------------------|-----|--------------------|-------------------|
| (SIRROUND-D) [15]                                                                              | SKM 50mg Q4W + csDMARD           | 557 |       | 54.8 <sup>c</sup> | 30 <sup>c</sup>   | 13.5 <sup>c</sup> | 26 <sup>b</sup>   |     | -0.43 <sup>b</sup> | 0.35 <sup>b</sup> |
|                                                                                                | SKM 100mg Q2W + csDMARD          | 557 |       | 53.5 <sup>c</sup> | 26.2 <sup>c</sup> | 13.5 <sup>c</sup> | 25.5 <sup>b</sup> |     | -0.46 <sup>b</sup> | 0.3 <sup>b</sup>  |
| Mease 2018 [16]                                                                                | Placebo + MTX                    | 51  | 16    | 41.2              |                   |                   | 7.8               | 3.9 |                    |                   |
|                                                                                                | CNTO6785 15mg Q4W + MTX          | 52  |       | 51.9              |                   |                   | 15                | 4.9 |                    |                   |
|                                                                                                | CNTO6785 50mg Q4W + MTX          | 51  |       | 47.1              |                   |                   |                   |     |                    |                   |
|                                                                                                | CNTO6785 100mg Q4W + MTX         | 51  |       | 37.3              |                   |                   |                   |     |                    |                   |
|                                                                                                | CNTO6785 200mg Q4W + MTX         | 52  |       | 40.4              |                   |                   |                   |     |                    |                   |
| Tanaka 2018b (KAKEHASI) [17, 18]                                                               | Placebo + MTX                    | 82  | 24    | 14.8              |                   |                   |                   |     |                    |                   |
|                                                                                                | SLM 150mg Q2W + MTX              | 81  |       | 67.9              |                   |                   |                   |     |                    |                   |
|                                                                                                | SLM 200mg Q2W + MTX              | 80  |       | 57.5              |                   |                   |                   |     |                    |                   |
| van Vollenhoven 2018 [19]                                                                      | Placebo + MTX                    | 79  | 12    | 35.2              | 9.9               | 1.4               | 2.9               |     | -0.22              |                   |
|                                                                                                | TLM 25mg + MTX                   | 80  |       | 42.3              | 12.7              | 2.8               | 0                 |     | -0.26              |                   |
|                                                                                                | TLM 100mg + MTX                  | 78  |       | 47                | 9.1               | 1.5               | 0                 |     | -0.22              |                   |
|                                                                                                | TLM 200mg + MTX                  | 76  |       | 44.3              | 12.9              | 4.3               | 2.9               |     | -0.15              |                   |
| Dokoupilova 2018 (REASSURE2) [20]                                                              | SEC 150mg + csDMARDs             | 81  | 24    | 38.3              | 18.5              | 11.1              |                   |     | -0.39              |                   |
|                                                                                                | SEC 75mg + csDMARDs              | 80  |       | 37.5              | 17.5              | 3.8               |                   |     | -0.42              |                   |
|                                                                                                | Placebo + csDMARDs               | 81  |       | 27.2              | 16.6              | 2.5               |                   |     | -0.13              |                   |
| Takeuchi 2018a [21]                                                                            | SKM 50mg Q4W + csDMARDs          | 61  | 16    | 77                | 47.5              | 26.2              | 45.9              |     |                    |                   |
|                                                                                                | SKM 100mg Q2W + csDMARDs         | 61  |       | 72.1              | 57.4              | 32.8              | 49.2              |     |                    |                   |
| Mazurov 2018 [118]                                                                             | BCD-020 600mg + MTX              | 107 | 24    | 65.69             | 28.43             | 12.75             |                   |     |                    |                   |
|                                                                                                | Placebo + MTX                    | 52  |       | 29.41             | 5.88              | 1.96              |                   |     |                    |                   |
| Matsubara 2018 [23]                                                                            | ABA 500mg/750mg/1000mg Q4W + MTX | 203 | 16/24 | 75.4              | 50.7              | 26.1              | 46.8              |     |                    | 0.84 <sup>b</sup> |
|                                                                                                | Placebo + MTX                    | 202 |       | 27.7              | 11.4              | 5                 | 16.3              |     |                    | 1.26 <sup>b</sup> |
| *numbers reported as median; <sup>a</sup> week 12; <sup>b</sup> week 24; <sup>c</sup> week 16; |                                  |     |       |                   |                   |                   |                   |     |                    |                   |



Table S3.2: Efficacy outcomes of trials comparing bDMARD to other bDMARDs.

| Study                                  | Treatment                                   | No. of patients (n) | Timepoint (weeks) | ACR20 (%) | ACR50 (%) | ACR70 (%) | DAS28 <2.6 (%) | CDAI ≤2.8 (%) | ACR/EULAR Boolean rem. (%) | ΔHAQ  | ΔmTSS |
|----------------------------------------|---------------------------------------------|---------------------|-------------------|-----------|-----------|-----------|----------------|---------------|----------------------------|-------|-------|
| Porter 2016 (ORBIT) [24]               | Anti-CD20 (RTX)                             | 140                 | 52                | 66        | 49        | 23        | 23             |               |                            | -0.49 |       |
|                                        | TNFi (ETA/ADA)                              | 134                 |                   | 71        | 45        | 26        | 21             |               |                            | -0.38 |       |
| Burmester 2017 (MONARCH) [25] [26]     | ADA 40mg Q2W                                | 185                 | 24                | 71.7      | 45.7      | 23.4      | 13             | 2.7           |                            | -0.43 |       |
|                                        | SLM 200mg Q2W                               | 184                 |                   | 58.4      | 29.7      | 11.9      | 49             | 7.1           |                            | -0.61 |       |
| Blanco 2017 (NURTURE 1) [27]           | SEC 10mg/kg i.v. + 150mg s.c. Q4W + csDMARD | 137                 | 24                | 30.7      | 16.8      | 10.2      |                |               |                            | -0.4  |       |
|                                        | SEC 10mg/kg i.v. + 75mg s.c. Q4W + csDMARD  | 138                 |                   | 28.3      | 11.6      | 5.1       |                |               |                            | -0.3  |       |
|                                        | ABA 500/750/1000mg + csDMARD                | 138                 |                   | 42.8      | 27.5      | 12.3      |                |               |                            | -0.6  |       |
|                                        | Placebo + csDMARD                           | 138                 |                   | 18.1      | 9.4       | 5.1       |                |               |                            | -0.3  |       |
| Weinblatt 2018 (EARTH EXPLORER 2) [28] | MVM 100mg Q2W + MTX                         | 70                  | 24                | 62        | 34.8      | 16.1      | 17.4           | 5.7           |                            | -0.44 |       |
|                                        | GLM 50mg Q4W                                | 68                  |                   | 65.6      | 43.4      | 25.9      | 29             | 17.6          |                            | -0.64 |       |
| Genovese 2018b [29]                    | ADA 40mg Q2W + MTX                          | 56                  | 12                | 67.9      | 48.2      | 21.4      | 30.4           | 7.1           |                            | -0.6  |       |
|                                        | ABT-122 60mg Q2W + MTX                      | 55                  |                   | 61.8      | 34.5      | 21.8      | 21.8           | 7.3           |                            | -0.6  |       |
|                                        | ABT-122 120mg Q2W + MTX                     | 56                  |                   | 75        | 46.4      | 17.9      | 37.5           | 10.7          |                            | -0.6  |       |
|                                        | ABT-122 120mg QW + MTX                      | 55                  |                   | 80        | 47.3      | 36.4      | 41.8           | 10.9          |                            | -0.9  |       |
| Taylor 2018 (SIRROUND-H) [30]          | ADA 40mg Q2W                                | 186                 | 24                | 56.5      | 31.7      | 12.9      | 7.5            |               | 3.8                        | -0.52 |       |
|                                        | SKM 50mg Q4W                                | 186                 |                   | 53.8      | 26.9      | 11.8      | 12.9           |               | 3.8                        | -0.51 |       |
|                                        | SKM 100mg Q2W                               | 187                 |                   | 58.8      | 35.3      | 15.5      | 20.3           |               | 3.7                        | -0.53 |       |
| Smolen 2016 (EXXELERATE) [31]          | CZP 400/200mg Q2W + MTX                     | 454                 | 12                | 69        |           |           |                | 24.9          |                            |       |       |
|                                        | ADA 40mg Q2W + MTX                          | 454                 |                   | 71        |           |           |                | 22.2          |                            |       |       |

Table S3.3: Efficacy outcomes of trials investigating switching of different bDMARDs.

| Study                           | Treatment                                           | No. of patients (n) | Timepoint (weeks) | ACR20 (%) | ACR50 (%) | ACR70 (%) | DAS28 <2.6 (%) | ACR/EULAR Boolean rem. (%) | ΔHAQ | ΔmTSS |
|---------------------------------|-----------------------------------------------------|---------------------|-------------------|-----------|-----------|-----------|----------------|----------------------------|------|-------|
| Gottenberg 2016 (ROC) [32]      | Non-TNFi (ABA; RTX; TCZ)                            | 146                 | 24                |           |           |           | 20             |                            |      |       |
|                                 | TNFi (ADA; CZP; ETA; GOL; INF)                      | 146                 |                   |           |           |           | 10             |                            |      |       |
| Smolen 2016 (EXXELERATE) [31]   | CZP primary non-responders switched to ADA          | 65                  | 24                | 43.9      | 16.9      | 7.7       | 9.2            |                            |      |       |
|                                 | ADA primary non-responders switched to CZP          | 57                  |                   | 40        | 22.8      | 10.5      | 5.3            |                            |      |       |
| Verschuieren 2018 (EXTEND) [33] | TCZ 4mg/kg non-responders; SAR 200mg Q2W + csDMARDs | 37                  | 24                | 75        | 35        | 29        | 41             |                            |      |       |
|                                 | TCZ 4mg/kg responders; SAR 200mg Q2W + csDMARDs     |                     |                   | 93        | 88        | 90        | 90             |                            |      |       |
|                                 | TCZ 8mg/kg non-responders; SAR 200mg Q2W + csDMARDs | 56                  |                   | 60        | 47        | 32        | 46             |                            |      |       |
|                                 | TCZ 8mg/kg responders; SAR 200mg Q2W + csDMARDs     |                     |                   | 91        | 79        | 75        | 78             |                            |      |       |

Table S3.4: Efficacy outcomes of trials investigating bDMARD induction vs. csDMARD induction trials in early RA.

| Study                               | Treatment                                    | No. of patients (n)                | Timepoint (weeks)                | ACR20 (%)         | ACR50 (%)         | ACR70 (%)         | DAS28 <2.6 (%)    | ACR/EULAR Boolean rem. (%) | ΔHAQ               | ΔmTSS             |
|-------------------------------------|----------------------------------------------|------------------------------------|----------------------------------|-------------------|-------------------|-------------------|-------------------|----------------------------|--------------------|-------------------|
| Emery 2017 (C-EARLY) [34]           | Placebo + MTX                                | 213                                | 52                               | 61.5              | 52.6              | 39.9              | 15*               | 20.7                       | -0.82              | 1.8               |
|                                     | CZP 200mg Q4W + MTX                          | 655                                |                                  | 69                | 61.8              | 51.3              | 28.9*             | 32.4                       | -0.98              | 0.2               |
| Emery ACR 2018 (AVERT-2) [35]       | ABA 125mg QW + MTX                           | 225 <sup>a</sup> /451 <sup>b</sup> | 24 <sup>a</sup> /52 <sup>b</sup> |                   |                   |                   | 38.7 <sup>a</sup> | 21.5 <sup>a</sup>          |                    | 0.5 <sup>b</sup>  |
|                                     | Placebo + MTX                                | 150 <sup>a</sup> /301 <sup>b</sup> |                                  |                   |                   |                   | 25.3 <sup>a</sup> | 11.6 <sup>a</sup>          |                    | 2.5 <sup>b</sup>  |
| Stamm 2018 (DINORA) [36]            | INF (3mg/kg wk0, 2, 6; INF 4mg/kg Q8W) + MTX | 36                                 | 54                               | 58                | 45                | 37                | 63                | 34                         | -0.57              | 0.18              |
|                                     | Placebo + MTX                                | 36                                 |                                  | 61                | 44                | 31                | 36                | 25                         | -0.38              | 0.16              |
|                                     | Placebo                                      | 16                                 |                                  | 19                | 19                | 13                | 19                | 6                          | -0.09              | 0                 |
| Burmester 2016 (FUNCTION) [37] [38] | Placebo + MTX                                | 287                                | 24 <sup>a</sup> /52 <sup>b</sup> | 65.2 <sup>a</sup> | 43.2 <sup>a</sup> | 25.4 <sup>a</sup> | 15 <sup>a</sup>   |                            | -0.71 <sup>a</sup> | 1.14 <sup>b</sup> |
|                                     | TCZ 4mg/kg Q4W + MTX                         | 288                                |                                  | 73.6 <sup>a</sup> | 47.9 <sup>a</sup> | 34.7 <sup>a</sup> | 31.9 <sup>a</sup> |                            | -0.92 <sup>a</sup> | 0.42 <sup>b</sup> |
|                                     | TCZ 8mg/kg Q4W + MTX                         | 290                                |                                  | 74.5 <sup>a</sup> | 56.9 <sup>a</sup> | 38.6 <sup>a</sup> | 44.8 <sup>a</sup> |                            | -0.91 <sup>a</sup> | 0.08 <sup>b</sup> |
|                                     | TCZ 8mg/kg Q4W + Placebo                     | 292                                |                                  | 70.2 <sup>a</sup> | 47.6 <sup>a</sup> | 30.1 <sup>a</sup> | 38.7 <sup>a</sup> |                            | -0.82 <sup>a</sup> | 0.26 <sup>b</sup> |

\*sustained remission at both weeks 40 + 52; <sup>a</sup> week 24; <sup>b</sup> week 52

Table S3.5: Efficacy of strategic studies.

| Study                                  | Treatment                    | No. of patients (n) | Timepoint (weeks) | ACR20 (%) | ACR50 (%) | ACR70 (%) | DAS28 <2.6 (%) | CDAI ≤ 2.8 | ACR/EULAR Boolean rem. (%) | ΔHAQ  | ΔmTSS |
|----------------------------------------|------------------------------|---------------------|-------------------|-----------|-----------|-----------|----------------|------------|----------------------------|-------|-------|
| Møller-Bisgaard 2019 (IMAGINE-RA) [39] | MRI Treat-to-Target          | 100                 | 104               |           |           |           | 85.3           | 69.7       | 49.3                       | -0.05 | 1     |
|                                        | Conventional Treat-to-Target | 100                 |                   |           |           |           | 88.3           | 64.8       | 31.9                       | 0.09  | 1.3   |
| Mueller 2019 [40]                      | CZP + T2T csDMARDs/GCs       | 21                  | 24                | 90.5      | 76.2      | 71.4      | 68.4           | 78.9       | 47.4                       | -0.68 |       |
|                                        | CZP + fixed regimen          | 22                  |                   | 59.1      | 36.4      | 27.3      | 28.6           | 23.8       | 19.1                       | -0.25 |       |

Table S3.6: Efficacy of trials investigating bDMARD and tsDMARD tapering.

| Study                                         | Primary / Secondary Outcome                                                                                              | Timepoint (week) | Treatment arm                               | No. of patients (n) | Result                    | p                                   |
|-----------------------------------------------|--------------------------------------------------------------------------------------------------------------------------|------------------|---------------------------------------------|---------------------|---------------------------|-------------------------------------|
| Oba 2017 / Tanaka<br>ACR 2018 (RRRR) [41, 42] | 1-year sustained discontinuation rate of INF;                                                                            | 106              | INF 3mg/8mg/10mg/kg Q8W based on TNF levels | 170                 | 23.5%                     | 0.631                               |
|                                               |                                                                                                                          |                  | INF standard 3mg/kg Q8W                     | 167                 | 21.3%                     |                                     |
| Chatzidionysiou 2016 (ADMIRE) [43]            | DAS28<2.6 at week 28                                                                                                     | 28               | ADA + MTX continuation                      | 16                  | 93.75                     | 0.001                               |
|                                               |                                                                                                                          |                  | ADA discontinuation; MTX monotherapy        | 16                  | 33                        |                                     |
| Moghadam 2016/2018 (POET) [44, 45]            | % of pat. DAS28 $\geq$ 3.2 + $\Delta$ DAS28 >0.6 during 1 year                                                           | 52               | Stopping TNFi                               | 531                 | 51.2                      | <0.001; HR: 3.50 (95% CI 2.60-4.72) |
|                                               |                                                                                                                          |                  | Continuation of TNFi                        | 286                 | 18.2                      |                                     |
| Atsumi 2017 (C-OPERA) [47]                    | Mean Progression of mTSS; SDAI $\leq$ 3.3; Boolean; DAS28-ESR<2.6                                                        | 104              | CZP + MTX continuation                      | 108                 | 0.66; 41.5%; 34.6%; 41.5% | 0.001; 0.026; 0.049; 0.132          |
|                                               |                                                                                                                          |                  | Stopping CZP; MTX + PLC                     | 71                  | 3.01; 29.3%; 24.2%; 33.1% |                                     |
| Kaneko 2018 (SURPRISE) [48]                   | TCZ free rate; TCZ free DAS28-ESR<2.6; $\leq$ 3.2; $\Delta$ mTSS                                                         | 104              | stopping TCZ; MTX monotherapy               | 49                  | 67.3%; 24.4%; 55.1%; 0.37 | 0.001; 0.29; 0.005; 0.36            |
|                                               |                                                                                                                          |                  | stopping TCZ; No DMARD                      | 53                  | 28.5%; 14.3%; 26.6%; 0.64 |                                     |
| Weinblatt 2017 (C-EARLY) [49]                 | DAS28-ESR $\leq$ 3.2 without flares during week 52-104; % of patients with radiographic progression ( $\Delta$ mTSS>0.5) | 104              | CZP 200mg Q2W + MTX (standard)              | 84                  | 48.8%; 9.7%               | Reference                           |
|                                               |                                                                                                                          |                  | CZP 200mg Q4W + MTX (reduced frequency)     | 126                 | 53.2%; 15.9%              | 0.112; NR                           |
|                                               |                                                                                                                          |                  | Placebo + MTX (CZP stopped)                 | 79                  | 39.2%; 81.1%              | 0.041; NR                           |
| Ibrahim 2017 (OPTIRRA) [50]                   | Flare ( $\Delta$ DAS28 $\geq$ 0.6 + DAS28>3.2 + $\Delta$ SJC OR $\Delta$ DAS28>1.2 + DAS28>3.2)                          | 24               | TNFi 33% tapering; csDMARD                  | 26                  | 12%                       | 0.873; HR: 0.90, 95% CI: 0.23-3.48  |
|                                               |                                                                                                                          |                  | TNFi 66% tapering; csDMARD                  | 21                  | 29%                       | 0.097; HR 2.52, 95% CI 0.85-7.48    |
|                                               |                                                                                                                          |                  | Control; csDMARD continuation               | 50                  | 16%                       | Reference                           |

|                                |                                                                                                                 |     |                                  |     |                       |                     |
|--------------------------------|-----------------------------------------------------------------------------------------------------------------|-----|----------------------------------|-----|-----------------------|---------------------|
| Bouman 2017 (DRESS) [64]       | Incidence of major flare ( $\Delta$ DAS28-CRP>1.2 or $\Delta$ DAS28-CRP>0.6+DAS28-CRP $\geq$ 3.2 for >12 weeks) | 144 | TNFi dose reduction extension    | 115 | 17%                   | 3%, 95% CI -10%-15% |
|                                |                                                                                                                 |     | Usual care extension             | 57  | 14%                   |                     |
| l'Ami 2018 [65]                | $\Delta$ DAS28-ESR, $\Delta$ CDAI, $\Delta$ SDAI                                                                | 28  | ADA 40mg Q3W $\pm$ MTX           | 27  | -0.14; +0.5;<br>+0.4; | 0.01; 0.23; 0.36    |
|                                |                                                                                                                 |     | ADA 40mg Q2W $\pm$ MTX           | 27  | 0.3; +1.5; +1.6       |                     |
| Takeuchi 2019 (RA-BEYOND) [81] | CDAI $\leq$ 10; CDAI $\leq$ 2.8                                                                                 | 12  | Continued BARI 4mg $\pm$ csDMARD | 281 | 93; 41                | <0.001; NR          |
|                                |                                                                                                                 |     | BARI Step-down 2mg $\pm$ csDMARD | 278 | 83; 38                |                     |

Table S3.7: Efficacy of trials investigating csDMARD or glucocorticoid tapering

| Study                              | Design     | Primary / Secondary Outcome                                                                 | Timepoint (week) | Treatment arm                                   | No. of patients (n) | Result                     | P / 95% CI                             |
|------------------------------------|------------|---------------------------------------------------------------------------------------------|------------------|-------------------------------------------------|---------------------|----------------------------|----------------------------------------|
| Kaeley 2016 (MUSICA) [54]          | NI (15%)   | Mean DAS28-CRP                                                                              | 24               | ADA 40mg Q2W + 7.5 mg MTX                       | 154                 | 4.12 (95% CI 3.88-4.34)    | 0.014                                  |
|                                    |            |                                                                                             |                  | ADA 40mg Q2W + 20 mg MTX                        | 155                 | 3.75 (95% CI 3.52-3.97)    |                                        |
| Keystone 2016 (CAMEO) [55]         | NI (<0.6)  | Mean $\Delta$ DAS28-ESR; mTSS; $\Delta$ DAS28; $\Delta$ SDAI; $\Delta$ CDAI; %DAS28-ESR<2.6 | 24/104           | ETA 50mg QW; MTX discontinuation                | 98                  | 0.5; 0.4; 0.56; 4.7; 4.1;  | 0.815                                  |
|                                    |            |                                                                                             |                  | ETA 50mg QW + MTX continuation                  | 107                 | 0.04; 0.0; 0.08; 0.9; 1.0; |                                        |
| Pope EULAR 2017/ACR 2018 [56] [57] | NR         | $\Delta$ DAS28-ESR; DAS28 $\leq$ 3.2; DAS28-ESR<2.6                                         | 76               | CZP + csDMARD continuation                      | 37                  | -2.1; 60%; 43.3%           | NR                                     |
|                                    |            |                                                                                             |                  | CZP + csDMARD discontinuation                   | 44                  | -2.1; 59.4%; 43.8%         |                                        |
| Burmester ACR 2018 (SEMIRA) [58]   | NI/S (0.6) | $\Delta$ DAS28-ESR; DAS28-ESR $\leq$ 3.2 + no flare + no adrenal insufficiency              | 24               | TCZ $\pm$ csDMARDs; Glucocorticoid tapering     | 131                 | 0.538; 64.9%               | <0.001; 0.02                           |
|                                    |            |                                                                                             |                  | TCZ $\pm$ csDMARDs; Glucocorticoid continuation | 128                 | -0.075; 77.3%              |                                        |
| Pablos 2018 (JUST-ACT) [59]        | NI (0.6)   | $\Delta$ DAS28-ESR week 16-week 28; DAS28<2.6; CDAI<2.6; SDAI<3.3                           | 28               | TCZ 8 mg/kg + MTX                               | 82                  | 0.007; 82.3%; 40.7%; 35.1% | 95% CI -0.40-0.27; 0.328; 0.518; 0.358 |
|                                    |            |                                                                                             |                  | TCZ 8 mg/kg + PBO                               | 82                  | 0.073; 75.9%; 35.8%; 28.2% |                                        |
| Kremer 2018 (COMP-ACT) [60]        | NI (0.6)   | $\Delta$ DAS28-ESR week 24-week 40; DAS28<2.6;                                              | 40               | TCZ 162mg s.c. + PLC                            | 147                 | 0.46; 49.7;                | 95% CI 0.045-0.592                     |
|                                    |            |                                                                                             |                  | TCZ 162mg s.c. + MTX                            | 147                 | 0.14; 59.2;                |                                        |
| Edwards 2018 (ACT-TAPER) [61]      | NI (10%)   | Pat. Maintaining EULAR good/moderate response from week 24-60; DAS28<2.6                    | 60               | TCZ 8mg/kg Q4W + PBO                            | 136                 | 76.5%; 51.5%               | 0.036; 0.342                           |
|                                    |            |                                                                                             |                  | TCZ 8mg/kg Q4W + MTX                            | 136                 | 65.4%; 47.1%               |                                        |
| Stouten 2018 (CareRA) [62]         | NS         | DAS28-CRP<2.6; CDAI $\leq$ 2.8; SDAI $\leq$ 3.3; $\Delta$ HQAQ; $\Delta$ mTSS               | 65               | COBRA Avant Garde->MTX 15mg/week                | 32                  | 93.8;65.6; 62.5;0.3;0.7    | 0.031; 0.362; 0.506;                   |
|                                    |            |                                                                                             |                  | COBRA Avant Garde->LEF 20mg/d                   | 26                  | 73.1;53.8; 53.8;0.3;0.9    | 0.968; 0.702                           |

Table S3.8: Efficacy of trials investigating combined bDMARD and/or csDMARD tapering

| Study                               | Primary Outcome                               | Timepoint (week) | Treatment arm                                          | No. of patients (n) | Result        | p / HR / 95% CI                   |
|-------------------------------------|-----------------------------------------------|------------------|--------------------------------------------------------|---------------------|---------------|-----------------------------------|
| Emery 2019 (AVERT) [46]             | DAS28-CRP<2.6 drug free remission             | 104              | ABA + MTX continuation                                 | 84                  | 12.3%         | NR                                |
|                                     |                                               |                  | ABA monotherapy                                        | 66                  | 14%           |                                   |
|                                     |                                               |                  | MTX monotherapy                                        | 73                  | 11.3%         |                                   |
| El Miedany 2016 [52]                | Sustained DAS28<2.6 (not reported); DAS28>3.2 | 52               | bDMARD tapering -50%, csDMARDs unchanged               | 31                  | 41.9          | <0.01                             |
|                                     |                                               |                  | csDMARD + bDMARD -50%                                  | 32                  | 59.3          | <0.01                             |
|                                     |                                               |                  | stop bDMARD, reduce csDMARD -50%                       | 31                  | 67.7          | <0.01                             |
|                                     |                                               |                  | stop bDMARD+csDMARD                                    | 31                  | 77.4          | <0.01                             |
|                                     |                                               |                  | continue bDMARD+csDMARD                                | 32                  | 6.5           | Reference                         |
| Van Mulligen EULAR 2018 (TARA) [53] | Flare: DAS44 >2.4 and/or SJC>1                | 52               | Tapering csDMARDs                                      | 93                  | 32            | 0.55; HR: 0.91 (95% CI 0.68-1.22) |
|                                     |                                               |                  | Tapering TNFi                                          | 94                  | 41            |                                   |
| Urata EULAR 2016 (r-T4) [63]        | SDAI<3.3                                      | 52               | Standard care                                          | 56                  | 38.2          | Reference                         |
|                                     |                                               |                  | SDAI guided tapering                                   | 54                  | NR            | NR                                |
|                                     |                                               |                  | MMP-3 guided tapering                                  | 57                  | 32.7          | -1.8%, 95% CI 3.8%-5.3%           |
|                                     |                                               |                  | SDAI + MMP-3 guided tapering                           | 56                  | 40            | 5.5%, 95% CI 1.9%-5.3%            |
| Akdemir 2018 (IMPROVED) [51]        | DAS<1.6; DFR; ACR/EULAR Boolean Remission     | 260              | Overall IMPROVED study population                      | 610                 | 48%; 22%      | 0.768; 0.374; 0.186               |
|                                     |                                               |                  | Arm 1 (csDMARD + GC Start) at randomization (4 months) | 83                  | 50%; 15%; 13% |                                   |
|                                     |                                               |                  | Arm 2 (ADA Start) at randomization (4 months)          | 78                  | 49%; 20%; 22% |                                   |



Table S3.9: Efficacy of trials investigating tsDMARDs ± csDMARDs versus Placebo ± csDMARDs.

| Study                 | Treatment               | No. of patients (n) | Timepoint (weeks) | ACR20 (%) | ACR50 (%) | ACR70 (%) | DAS28 <2.6 (%) | CDAI ≤2.8 (%) | ACR/EULAR Boolean rem. (%) | ΔHAQ  | ΔmTSS |
|-----------------------|-------------------------|---------------------|-------------------|-----------|-----------|-----------|----------------|---------------|----------------------------|-------|-------|
| Fleischmann 2015 [66] | Placebo                 | 41                  | 12                | 28        | 7         | 2         | 7.3            |               |                            | -0.12 |       |
|                       | DEC 25mg BID            | 41                  |                   | 39        | 17        | 7         |                |               |                            | -0.24 |       |
|                       | DEC 50mg BID            | 41                  |                   | 61        | 32        | 12        |                |               |                            | -0.5  |       |
|                       | DEC 100mg BID           | 40                  |                   | 65        | 38        | 18        | 35             |               |                            | -0.52 |       |
|                       | DEC 150mg BID           | 41                  |                   | 66        | 49        | 22        | 36.6           |               |                            | -0.64 |       |
| Genovese 2016c [67]   | Placebo + csDMARD       | 12                  | 12                | 25        | 8.3       | 8.3       |                |               |                            |       |       |
|                       | DEC 100mg BID + csDMARD | 11                  |                   | 63        | 27.3      | 18.2      |                |               |                            |       |       |
|                       | DEC 200mg BID + csDMARD | 10                  |                   | 60        | 30        | 10        |                |               |                            |       |       |
|                       | DEC 300mg BID + csDMARD | 10                  |                   | 60        | 60        | 20        |                |               |                            |       |       |
| Genovese 2016b [68]   | Placebo + MTX           | 71                  | 24                | 16.9      | 7         | 2.8       | 5.6            |               |                            | -0.6  |       |
|                       | DEC 100mg OD + MTX      | 71                  |                   | 60.6      | 38        | 16.9      | 21.1           |               |                            | -0.62 |       |
|                       | DEC 150mg OD + MTX      | 72                  |                   | 61.1      | 38.9      | 18.1      | 29.2           |               |                            | -0.65 |       |
|                       | DEC 200mg OD + MTX      | 72                  |                   | 61.1      | 40.3      | 15.3      | 27.8           |               |                            | -0.79 |       |
|                       | DEC 100mg BID + MTX     | 72                  |                   | 62.5      | 47.2      | 25        | 31.9           |               |                            | -0.75 |       |
| Takeuchi 2016a [69]   | Placebo                 | 56                  | 12                | 10.7      | 5.4       | 1.8       | 5.4            |               |                            | 0.16  |       |
|                       | PEF 25mg OD             | 55                  |                   | 23.6      | 7.3       | 0         | 0              |               |                            | 0.14  |       |
|                       | PEF 50mg OD             | 57                  |                   | 31.6      | 8.8       | 1.8       | 7              |               |                            | 0.05  |       |
|                       | PEF 100mg OD            | 55                  |                   | 54.5      | 30.9      | 16.4      | 27.3           |               |                            | -0.17 |       |
|                       | PEF 150mg OD            | 58                  |                   | 65.5      | 29.3      | 12.1      | 20.7           |               |                            | -0.23 |       |
| Genovese 2017c [70]   | Placebo + HCQ/SZP       | 51                  | 12                | 29.4      | 9.8       | 7.8       | 9.8            |               |                            |       |       |
|                       | PEF 25mg + HCQ/SZP      | 59                  |                   | 22        | 15.3      | 6.8       | 6.8            |               |                            |       |       |
|                       | PEF 50mg + HCQ/SZP      | 57                  |                   | 36.8      | 24.6      | 15.8      | 12.5           |               |                            |       |       |
|                       | PEF 100mg + HCQ/SZP     | 58                  |                   | 48.3      | 27.6      | 19        | 22.8           |               |                            |       |       |
|                       | PEF 150mg + HCQ/SZP     | 64                  |                   | 56.3      | 28.1      | 10.9      | 20.3           |               |                            |       |       |

|                                     |                         |     |                                  |                   |                   |                   |                   |       |      |        |                   |
|-------------------------------------|-------------------------|-----|----------------------------------|-------------------|-------------------|-------------------|-------------------|-------|------|--------|-------------------|
| Kivitz 2017 [71]                    | Placebo + MTX           | 72  | 12                               | 44.4              | 26.4              | 11.1              |                   |       |      |        |                   |
|                                     | PEF 25mg + MTX          | 66  |                                  | 43.9              | 18.2              | 9.1               |                   |       |      |        |                   |
|                                     | PEF 50mg + MTX          | 78  |                                  | 61.5              | 33.3              | 15.4              |                   |       |      |        |                   |
|                                     | PEF 100mg + MTX         | 84  |                                  | 46.4              | 33.3              | 16.7              |                   |       |      |        |                   |
|                                     | PEF 150mg + MTX         | 78  |                                  | 57.7              | 37.2              | 19.2              |                   |       |      |        |                   |
| Tanaka ACR 2018a [72, 73]           | Placebo ± csDMARDs      | 101 | 12                               | 30.7              | 8.9               | 1                 | 5                 |       |      |        |                   |
|                                     | PEF 100mg OD ± csDMARDs | 104 |                                  | 57.7              | 30.8              | 13.5              | 24.5              |       |      |        |                   |
|                                     | PEF 150mg OD ± csDMARDs | 102 |                                  | 74.5              | 42.2              | 27.5              | 34.7              |       |      |        |                   |
|                                     | ETA 50mg QW ± csDMARDs  | 200 |                                  | 83.5              | 52.5              | 30.5              | 45.5              |       |      |        |                   |
| Takeuchi ACR 2018 [74, 75]          | Placebo + MTXs          | 170 | 12 <sup>a</sup> /28 <sup>b</sup> | 21.8 <sup>a</sup> | 7.6 <sup>a</sup>  | 2.4 <sup>a</sup>  | 7.7 <sup>a</sup>  |       |      |        | 3.37 <sup>b</sup> |
|                                     | PEF 100mg OD + MTXs     | 174 |                                  | 58.6 <sup>a</sup> | 29.9 <sup>a</sup> | 12.1 <sup>a</sup> | 31.4 <sup>a</sup> |       |      |        | 1.62 <sup>b</sup> |
|                                     | PEF 150mg OD + MTXs     | 174 |                                  | 64.4 <sup>a</sup> | 46 <sup>a</sup>   | 23.6 <sup>a</sup> | 35.1 <sup>a</sup> |       |      |        | 1.03 <sup>b</sup> |
| Westhovens 2017 (DARWIN 1) [76, 79] | Placebo + MTX           | 86  | 12                               | 44.19             | 15.12             | 8.14              | 6.98              | 2.33  | 3.49 | -0.38  |                   |
|                                     | FILGO 50mg OD + MTX     | 82  |                                  | 56.1              | 32.93             | 15.85             | 12.2              | 7.32  | 3.66 | -0.58  |                   |
|                                     | FILGO 100mg OD + MTX    | 85  |                                  | 63.53             | 37.65             | 21.18             | 22.35             | 8.24  | 3.53 | -0.65  |                   |
|                                     | FILGO 200mg OD + MTX    | 86  |                                  | 68.6              | 43.02             | 24.42             | 22.09             | 10.47 | 5.81 | -0.75  |                   |
|                                     | FILGO 25mg BID + MTX    | 86  |                                  | 56.98             | 27.91             | 13.95             | 15.12             | 10.47 | 4.65 | -0.59  |                   |
|                                     | FILGO 50mg BID + MTX    | 85  |                                  | 60                | 34.12             | 18.82             | 17.65             | 8.24  | 4.71 | -0.58  |                   |
|                                     | FILGO 100mg BID+ MTX    | 84  |                                  | 78.57             | 54.76             | 30.95             | 35.71             | 17.86 | 9.52 | -0.84  |                   |
| Kavanaugh 2017 (DARWIN 2) [77, 79]  | Placebo                 | 72  | 12                               | 29.2              | 11.1              | 2.8               | 6.9               | 2.8   | 1.4  | -0.226 |                   |
|                                     | FILGO 50mg OD           | 72  |                                  | 66.7              | 34.7              | 8.3               | 12.5              | 2.8   | 1.4  | -0.661 |                   |
|                                     | FILGO 100mg OD          | 70  |                                  | 65.7              | 37.1              | 18.6              | 14.3              | 5.7   | 4.3  | -0.677 |                   |
|                                     | FILGO 200mg OD          | 69  |                                  | 72.5              | 43.5              | 13                | 17.4              | 8.7   | 4.3  | -0.739 |                   |
| Kivitz ACR 2018 [80]                | Placebo + MTX           | 22  | 12                               | 40.9              | 22.7              | 13.6              |                   |       |      | -0.39  |                   |
|                                     | GS-9876 10mg OD + MTX   | 20  |                                  | 25                | 20                | 15                |                   |       |      | -0.18  |                   |
|                                     | GS-9876 30mg OD + MTX   | 20  |                                  | 35                | 20                | 5                 |                   |       |      | -0.46  |                   |
| Dougados 2017 (RA-BUILD) [84]       | Placebo + csDMARD       | 228 | 12/24 <sup>a</sup>               | 39.47             | 12.72             | 3.07              |                   |       | 0.44 | -0.3   | 0.70 <sup>a</sup> |
|                                     | BARI 2mg + csDMARD      | 229 |                                  | 65.94             | 33.62             | 17.9              |                   |       | 6.99 | -0.52  | 0.33 <sup>a</sup> |
|                                     | BARI 4mg + csDMARD      | 227 |                                  | 61.67             | 33.48             | 18.06             |                   |       | 6.61 | -0.52  | 0.15 <sup>a</sup> |

|                                                              |                                          |     |                    |      |      |      |                   |      |      |       |                   |
|--------------------------------------------------------------|------------------------------------------|-----|--------------------|------|------|------|-------------------|------|------|-------|-------------------|
| Schiff/Fleischmann<br>2017b (RA-BEGIN)<br>[86, 87]           | Placebo + MTX                            | 210 | 24                 | 61.9 | 43.3 | 21.4 | 23.8              | 11   |      | -0.74 | 0.61              |
|                                                              | BARI 4mg + Placebo                       | 159 |                    | 76.7 | 59.7 | 42.1 | 40.3              | 21.4 |      | -1.04 | 0.39              |
|                                                              | BARI 4mg + MTX                           | 215 |                    | 78.1 | 63.3 | 39.5 | 40.5              | 22.3 |      | -1.03 | 0.29              |
| Hu/Yue 2018 (RA-<br>BALANCE) [91, 92]                        | Placebo + MTX                            | 145 | 12                 | 28.3 | 8.3  | 1.4  | 2.8               |      |      | -0.35 |                   |
|                                                              | BARI 4mg + MTX                           | 145 |                    | 58.6 | 30.3 | 9.7  | 11.7              |      |      | -0.57 |                   |
| Tanaka 2019 [82]                                             | TOFA 11mg modified-<br>release OD + MTX  | 104 | 12                 | 84.5 | 68   | 31.1 | 50.5              | 18.5 | 11.7 | -0.44 |                   |
|                                                              | TOFA 5mg immediate-<br>release BID + MTX | 105 |                    | 79.8 | 68.3 | 46.2 | 69.2              | 36.5 | 29.8 | -0.46 |                   |
| van der Heijde 2019<br>(ORAL Scan) [83]                      | TOFA 5mg + MTX                           | 321 | 96                 | 2.8  | 2.7  | 2.2  | 1.9               | 1.9  | 1.7  | -0.5  |                   |
|                                                              | TOFA 10mg + MTX                          | 316 |                    | 2.8  | 2.8  | 2.6  | 2.2               | 2.3  | 2    | -0.7  |                   |
|                                                              | Placebo->TOFA 5mg + MTX                  | 81  |                    | 5.5  | 5.5  | 4.6  | 3.3               | 3.7  | 3.9  | -0.6  |                   |
|                                                              | Placebo->TOFA 10mg + MTX                 | 79  |                    | 5.7  | 5.6  | 5.1  | 4.5               | 4.8  | 4.7  | -0.6  |                   |
| Tanaka 2018a<br>(SELECT-SUNRISE)<br>[89]                     | Placebo + csDMARDs                       | 49  | 12                 | 42.9 | 16.3 | 2    | 6.1               |      |      | -0.1  |                   |
|                                                              | UPA 7.5mg + csDMARDs                     | 49  |                    | 75.5 | 40.6 | 20.4 | 36.7              |      |      | -0.41 |                   |
|                                                              | UPA 15mg + csDMARDs                      | 49  |                    | 83.7 | 65.3 | 34.7 | 57.1              |      |      | -0.45 |                   |
|                                                              | UPA 30mg + csDMARDs                      | 50  |                    | 80   | 58   | 28   | 50                |      |      | -0.49 |                   |
| Genovese/Strand<br>2018 (SELECT-<br>BEYOND) [93, 94]         | Placebo + csDMARD                        | 169 | 12                 | 28   | 34   | 7    |                   |      |      | -0.16 |                   |
|                                                              | UPA 15mg + csDMARD                       | 164 |                    | 65   | 36   | 12   |                   |      |      | -0.41 |                   |
|                                                              | UPA 30mg + csDMARD                       | 165 |                    | 93   | 12   | 23   |                   |      |      | -0.44 |                   |
| Burmeister/Strand<br>2018 (SELECT-NEXT)<br>[95, 100]         | Placebo + csDMARD                        | 221 | 12                 | 36   | 15   | 6    | 10                | 3    | 4    | -0.26 |                   |
|                                                              | UPA 15mg + csDMARD                       | 221 |                    | 64   | 38   | 21   | 31                | 9    | 10   | -0.61 |                   |
|                                                              | UPA 30mg + csDMARD                       | 219 |                    | 66   | 43   | 27   | 28                | 12   | 9    | -0.55 |                   |
| van Vollenhoven<br>ACR 2018 (SELECT-<br>EARLY) [78]          | Placebo + MTX                            | 314 | 12/24 <sup>a</sup> | 54.1 | 28.3 | 14   | 18.5 <sup>a</sup> | 6.4  | 6.4  | -0.49 | 0.67 <sup>a</sup> |
|                                                              | UPA 15mg + MTX                           | 317 |                    | 75.7 | 52.1 | 32.5 | 48.3 <sup>a</sup> | 16.1 | 12.9 | -0.83 | 0.14 <sup>a</sup> |
|                                                              | UPA 30mg + MTX                           | 314 |                    | 77.1 | 56.4 | 36.9 | 50 <sup>a</sup>   | 21.3 | 15.3 | -0.86 | 0.07 <sup>a</sup> |
| Smolen EULAR/ACR<br>2018 (SELECT-<br>MONOTHERAPY)<br>[96-99] | Continued MTX                            | 216 | 14                 | 41.2 | 15.3 | 2.8  | 8.3               | 1    | 0.9  | -0.32 |                   |
|                                                              | UPA 15mg                                 | 217 |                    | 67.7 | 41.9 | 22.6 | 28.1              | 13   | 9.2  | -0.65 |                   |
|                                                              | UPA 30mg                                 | 215 |                    | 71.2 | 52.1 | 33   | 40.5              | 19   | 19.1 | -0.73 |                   |

Table S3.10: Efficacy of Head-to-Head studies comparing tsDMARDs and bDMARDs.

| Study                                                         | Treatment          | No. of patients (n) | Timepoint (weeks)  | ACR20 (%) | ACR50 (%) | ACR70 (%) | DAS28 <2.6 (%) | CDAI ≤2.8 (%) | ACR/EULAR Boolean rem. (%) | ΔHAQ  | ΔmTSS             |
|---------------------------------------------------------------|--------------------|---------------------|--------------------|-----------|-----------|-----------|----------------|---------------|----------------------------|-------|-------------------|
| Taylor/Keystone 2017 (RA-BEAM) [101] [102]                    | Placebo + MTX      | 488                 | 12/24 <sup>a</sup> | 40.2      | 16.8      | 4.7       | 4              | 2             | 1                          | -0.34 | 0.9 <sup>a</sup>  |
|                                                               | BARI 4mg + MTX     | 487                 |                    | 69.6      | 45        | 18.9      | 24             | 8             | 7.2                        | -0.66 | 0.41 <sup>a</sup> |
|                                                               | ADA 40mg Q2W + MTX | 330                 |                    | 61.2      | 34.8      | 12.7      | 19             | 7             | 5.2                        | -0.56 | 0.33 <sup>a</sup> |
| Fleischmann 2017/Strand EULAR 2018 (ORAL-Strategy) [103, 106] | TOFA 5mg BID + PLC | 384                 | 24                 | 64.8      | 38.3      | 18.2      | 21.1           | 10.2          | 7                          | -0.52 |                   |
|                                                               | TOFA 5mg BID + MTX | 376                 |                    | 73.1      | 46        | 25        | 30.6           | 13.8          | 8.2                        | -0.58 |                   |
|                                                               | ADA 40mg Q2W + MTX | 386                 |                    | 71        | 43.8      | 20.7      | 28             | 13.2          | 8.8                        | -0.54 |                   |
| Fleischmann ACR 2018 (SELECT-COMPARE) [104, 105]              | Placebo + MTX      | 651                 | 12/26 <sup>a</sup> | 36.4      | 14.9      | 4.9       | 6.1            | 3.1           | 2                          | -0.28 | 0.92 <sup>a</sup> |
|                                                               | UPA 15mg OD + MTX  | 651                 |                    | 70.5      | 45.2      | 24.9      | 28.7           | 13.4          | 9.8                        | -0.6  | 0.24 <sup>a</sup> |
|                                                               | ADA 40mg Q2W + MTX | 327                 |                    | 63        | 29.1      | 13.5      | 18             | 7.6           | 4                          | -0.49 | 0.1 <sup>a</sup>  |

ADA: Adalimumab; BARI: Baricitinib; TOFA: Tofacitinib; UPA: Upadacitinib; BID: twice daily; OD: once daily; Q2W: every two weeks; MTX: Methotrexate

Table S3.11: Efficacy outcomes of trials investigating biosimilars.

| Study                                | Treatment | No. of patients (n) | Timepoint (weeks) | Non-inferiority margin | Outcome              | Result | Estimate of treatment difference | 95% CI           |
|--------------------------------------|-----------|---------------------|-------------------|------------------------|----------------------|--------|----------------------------------|------------------|
| Jani 2016 [108]                      | ZRC-3197  | 60                  | 12                | 28.5%                  | %ACR20               | 82     |                                  | -11.99% to 17.5% |
|                                      | ADA       | 60                  |                   |                        |                      | 79.25  |                                  |                  |
| Denisov EULAR 2018 (LIRA) [109, 110] | BCD-055   | 198                 | 14                | 20%                    | %ACR20               | 75.83  |                                  | -12.9% to 16.18% |
|                                      | INF       |                     |                   |                        |                      | 74.19  |                                  |                  |
| Wiland ACR 2018 [111]                | GP2017    | 177                 | 12                | 0.6                    | ΔDAS28-CRP           | -2.16  | 0.02                             | -0.24 to 0.27    |
|                                      | ADA       | 176                 |                   |                        |                      | -2.18  |                                  |                  |
| Matsuno and Matsubara 2018 [112]     | NI-071    | 126                 | 14                | 0.6                    | ΔDAS28-ESR           | -2.15  | 0.02                             | -0.280 to 0.328  |
|                                      | INF       | 116                 |                   |                        |                      | -2.13  |                                  |                  |
| Yoo 2016 (PLANETRA) [113]            | CT-P13    | 302                 | 54                |                        | %ACR20               | 74.7   | 0.03                             | -0.05 to 0.12    |
|                                      | INF       | 304                 |                   |                        |                      | 71.3   |                                  |                  |
| Bae 2017 (HERA) [114]                | HD203     | 115                 | 24                | 20%                    | %ACR20               | 83.48  | 2.12                             | -7.65 to 11.89   |
|                                      | ETA       | 118                 |                   |                        |                      | 81.36  |                                  |                  |
| Jamshidi 2017 [115]                  | CinnoRA   | 68                  | 24                | -0.18                  | %EULAR good/moderate | 70.31  | NR                               | -4 to 4          |
|                                      | ADA       | 68                  |                   |                        |                      | 67.19  |                                  |                  |
| Smolen 2017c [116]                   | GP2013    | 133                 | 24                | 0.6                    | ΔDAS28-CRP           | -2.07  | 0.04                             | -0.241 to 0.323  |
|                                      | RTX-EU    | 87                  |                   |                        |                      | -2.11  |                                  |                  |
|                                      | RTX-US    | 92                  |                   |                        |                      |        |                                  |                  |
| Choe 2017 [117]                      | SB2       | 291                 | 30                | 15%                    | %ACR20               | 64.1   | -1.88                            | -10.26 to 6.51   |
|                                      | INF       | 293                 |                   |                        |                      | 66.0   |                                  |                  |
| Smolen 2017 [118]                    | SB2       | 291                 | 54                | 15%                    | %ACR20               | 65.3   | -3.07                            | -12.00 to 5.86   |
|                                      | INF       | 293                 |                   |                        |                      | 69.2   |                                  |                  |
| Cohen 2017 [119]                     | ABP 501   | 264                 | 24                | 0.738 to               | Risk Ratio           | 74.6   | 1.039                            | 0.954 to 1.133   |

|                                       |                    |     |       |                  |            |           |           |                                             |
|---------------------------------------|--------------------|-----|-------|------------------|------------|-----------|-----------|---------------------------------------------|
|                                       | ADA                | 262 |       | 1.355            | ACR20      | 72.4      |           |                                             |
| Alten EULAR 2017 (ARABESC) [120, 121] | FKB327             | 366 | 24    | 13%              | %ACR20     | 74.4      | NR        | -7.6 to 5.0                                 |
|                                       | ADA                | 362 |       |                  |            | 75.7      |           |                                             |
| Apsangikar 2018 [122]                 | AdaliRel           | 85  | 16    | NS               | %ACR20     | 90.48     | 0.91      | -23.96 to 25.54                             |
|                                       | ADA                | 21  |       |                  |            | 90        |           |                                             |
| Cohen 2018b [123]                     | PF-06438179/GP1111 | 324 | 14    | ±13.5; -12 to 15 | %ACR20     | 61.1      | -2.39     | -9.92 to 5.11                               |
|                                       | INF                | 326 |       |                  |            | 63.5      |           |                                             |
| Haridas 2018 [124]                    | DRL-RI             | 276 | 24    | NR               | %ACR20     | NR        | Reference | Reference                                   |
|                                       | RTX-US             |     |       |                  |            | NR        | 2.8       | -11.18 to 16.81                             |
|                                       | RTX-EU             |     |       |                  |            | NR        | 3.6       | -10.54 to 17.73                             |
| Matucci-Cerinic 2018 (EQUIRA) [125]   | GP2015             | 186 | 24    | 0.6              | ΔDAS28-CRP | -1.62     | -0.07     | -0.26 to 0.12                               |
|                                       | ETN                | 190 |       |                  |            | -1.67     |           |                                             |
| Weinblatt 2018 [129]                  | SB5                | 271 | 24    | 15%              | %ACR20     | 72.4      | 0.1       | -7.83 to 8.13                               |
|                                       | ADA                | 273 |       |                  |            | 72.2      |           |                                             |
| Matsuno 2018 [126]                    | LBEC0101           | 185 | 24    | 0.6              | ΔDAS28-ESR | -3.01     | -0.15     | -0.377 to 0.078                             |
|                                       | ETN                | 187 |       |                  |            | -2.86     |           |                                             |
| Nasonov ACR 2016 [130]                | BCD-020            | 80  | 24    | NR               | %ACR20     | 84.14     | NR        | -13.95 to 8.74                              |
|                                       | RTX                | 80  |       |                  |            | 87.01     |           |                                             |
| Fleischmann 2018 [127]                | PF-06410293        | 297 | 12    | 14%              | %ACR20     | 68.4      | -2.98     | -10.38 to 4.44                              |
|                                       | ADA                | 300 |       |                  |            | 71.3      |           |                                             |
| Park 2018 [128]                       | CT-P10             | 161 | 24    | 0.6              | ΔDAS28-CRP | -2.13     | -0.04     | -0.29 to 0.21                               |
|                                       | RTX                | 211 |       |                  |            | -2.09     |           |                                             |
| Cohen 2018a (VOLTAIRE) [134]          | BI 695501          | 324 | 12/24 | -12% to 15%/±15% | %ACR20     | 67.0/69.0 | 5.9 / 4.5 | 90% CI: -0.9 to 12.7 / 95% CI: -3.4 to 12.5 |
|                                       | ADA                | 321 |       |                  |            | 61.1/64.5 |           |                                             |
| Genovese 2017b [121, 135]             | FKB327             | 366 | 24    | -12% to 15%      | %ACR20     | 72.5      |           | 90% CI: -7.3 to 3.6                         |
|                                       | ADA                | 362 |       |                  |            | 74.3      |           |                                             |
| O'Dell 2016/2017 [107, 137]           | CHS-0214           | 256 | 24    | 15%              | %ACR20     | 91        |           | -4.55 to 5.37                               |
|                                       | ETN                | 256 |       |                  |            | 90.6      |           |                                             |

Table S3.12: Efficacy outcomes of trials investigating switching between bsDMARDs and their respective boDMARDs.

| Study                                  | Treatment          | No. of patients (n) | Timepoint of re-randomization (week) | Endpoint after crossover (week) | Non-inferiority margin                 | Outcome                                                                             | Result         | Estimate | 95% CI                       |
|----------------------------------------|--------------------|---------------------|--------------------------------------|---------------------------------|----------------------------------------|-------------------------------------------------------------------------------------|----------------|----------|------------------------------|
| Nasonov ACR 2016 [130]                 | BCD-020->BCD-020   | 40                  | 24                                   | 48                              | NR                                     | %ACR20/70                                                                           | 77.78/40       |          |                              |
|                                        | BCD-020->RTX       | 40                  |                                      |                                 |                                        |                                                                                     | 92.31/39.29    |          |                              |
|                                        | RTX->RTX           | 40                  |                                      |                                 |                                        |                                                                                     | 96.00/34.62    |          |                              |
|                                        | RTX->BCD-020       | 40                  |                                      |                                 |                                        |                                                                                     | 89.29/40.74    |          |                              |
| Smolen 2018 [131]                      | INF/SB2            | 94                  | 54                                   | 78                              | NS                                     | %ACR20/50/70                                                                        | 63.5/37.6/22.4 |          |                              |
|                                        | INF/INF            | 101                 |                                      |                                 |                                        |                                                                                     | 68.8/47.3/31.2 |          |                              |
|                                        | SB2/SB2            | 201                 |                                      |                                 |                                        |                                                                                     | 68.3/40.6/25.6 |          |                              |
| Kavanaugh ACR 2018 (EQUIRA) [132, 133] | GP2015             | 186                 | 24                                   | 48                              | NS                                     | %ACR20                                                                              | 89             |          |                              |
|                                        | ETN                | 190                 |                                      |                                 |                                        |                                                                                     | 82             |          |                              |
| Cohen 2018a (VOLTAIRE) [134]           | BI 695501          | 324                 | 24                                   | 48                              | NS                                     | %ACR20/50/70                                                                        | NR             |          |                              |
|                                        | ADA                | 321                 |                                      |                                 |                                        |                                                                                     | NR             |          |                              |
| Genovese 2017b [121, 135]              | FKB327->FKB327     | 216                 | 24                                   | 30                              | NS                                     | %ACR20                                                                              | 82.5           |          |                              |
|                                        | ADA->ADA           | 213                 |                                      |                                 |                                        |                                                                                     | 84.3           |          |                              |
|                                        | FKB327->ADA        | 108                 |                                      |                                 |                                        |                                                                                     | 86.5           |          |                              |
|                                        | ADA->FKB327        | 108                 |                                      |                                 |                                        |                                                                                     | 89.1           |          |                              |
| Jorgensen 2017 (NOR-SWITCH) [136]      | INF                | 39                  | 0                                    | 54                              | 15% (overall population <sup>1</sup> ) | Risk difference for disease worsening: $\Delta$ DAS28 $\geq$ 1.2 + DAS28 $\geq$ 3.2 | 36.7%          | 4.5%     | -20.3% to 29.3% <sup>1</sup> |
|                                        | CT-P13             | 39                  |                                      |                                 |                                        |                                                                                     | 30%            |          |                              |
| O'Dell 2016/2017 [107, 137]            | CHS-0214->CHS-0214 | 224                 | 24                                   | 48                              | NR                                     | %ACR20/50/70                                                                        | 93.8/75.0/49.6 |          |                              |
|                                        | ETN->CHS-0214      | 220                 |                                      |                                 |                                        |                                                                                     | 92.7/73.6/51.4 |          |                              |

|                      |                    |     |    |     |    |                        |                    |  |  |
|----------------------|--------------------|-----|----|-----|----|------------------------|--------------------|--|--|
| Song 2018 [138, 139] | LBEC0101->LBEC0101 | 70  | 48 | 100 | NR | %ACR20/50/70           | 79.7/65.2/44.9     |  |  |
|                      | ETN->LBEC0101      | 78  |    |     |    |                        | 83.3/66.7/42.3     |  |  |
| Weinblatt 2018 [140] | SB5                | 271 | 24 | 52  | NR | %ACR20/50/70;<br>ΔmTSS | 77.8/50/31.9/0.2   |  |  |
|                      | ADA->SB5           | 125 |    |     |    |                        | 78.8/54.2/26.3/0.3 |  |  |
|                      | ADA->ADA           | 129 |    |     |    |                        | 73.4/50.8/28.2/0.5 |  |  |



Table S3.13: Efficacy outcomes of trials investigating the efficacy of csDMARDs (or combination with csDMARDs/GCs) vs. another csDMARD (or combination) or placebo.

| Study                                                      | Treatment                    | No. of patients (n) | Endpoint (week) | Non-inferiority margin | Outcome                                                                                              | Result                 | Estimate                           | 95% CI / p                                                                                                                                |
|------------------------------------------------------------|------------------------------|---------------------|-----------------|------------------------|------------------------------------------------------------------------------------------------------|------------------------|------------------------------------|-------------------------------------------------------------------------------------------------------------------------------------------|
| Shin 2019 [141]                                            | TAC 1.5mg OD + MTX           | 37                  | 24              | 0.7                    | $\Delta$ DAS28-ESR                                                                                   | 3.06                   | PP: -0.0565<br>FAS: -0.181         | PP: -0.65-0.54<br>FAS: -0.81-0.44                                                                                                         |
|                                                            | LEF 10/20mg OD + MTX         | 37                  |                 |                        |                                                                                                      | 3.24                   |                                    |                                                                                                                                           |
| Register ACR 2016 [142]                                    | MTX + SSZ + HCQ              | 69                  | 48              |                        | %ACR20/50/70                                                                                         | 87/57/35               |                                    | <0.01 <sup>a</sup> / $<$ 0.001 <sup>b</sup> ;<br><0.05 <sup>a</sup> /0.06 <sup>b</sup> ;<br><0.005 <sup>a</sup> / $<$ 0.01 <sup>b</sup> ; |
|                                                            | LEF + SSZ + HCQ <sup>a</sup> |                     |                 |                        |                                                                                                      | 46/25/4                |                                    |                                                                                                                                           |
|                                                            | LEF <sup>b</sup>             |                     |                 |                        |                                                                                                      | 36/27/0                |                                    |                                                                                                                                           |
| Verschueren 2017/Stouten 2017; Stouten 2018 (CareRA) [143] | High risk: COBRA Classic     | 98                  | 52              |                        | DAS28-CRP $<$ 2.6 <sup>a</sup> ;<br>SDAI $\leq$ 3.3;<br>Boolean rem.;<br>$\Delta$ HAQ; $\Delta$ mTSS | 64.3;37.8;26.5;0.7;0.3 | 4.0% <sup>a</sup>                  | -9.4% to 17.3%                                                                                                                            |
|                                                            | High risk: COBRA Slim        | 98                  |                 |                        |                                                                                                      | 60.2;30.6;17.3;0.5;0.4 | Reference (high risk) <sup>a</sup> |                                                                                                                                           |
|                                                            | High risk: COBRA Avant Garde | 93                  |                 |                        |                                                                                                      | 62.4;45.2;30.1;0.6;0.3 | 1.9% <sup>a</sup>                  | -11.6% to 15.3%                                                                                                                           |
|                                                            | Low risk: MTX tight step-up  | 47                  |                 |                        |                                                                                                      | 57.4;29.8;21.3;0.5;0.2 | -10.0% <sup>a</sup>                | -28.6% to 9.8%<br>/ p=0.329                                                                                                               |
|                                                            | Low risk: COBRA Slim         | 43                  |                 |                        |                                                                                                      | 67.4;44.2;37.2;0.6;0.3 |                                    |                                                                                                                                           |
| Stouten ACR 2017 (CareRA) [144]                            | High risk: COBRA Classic     | 98                  | 104             |                        | %ACR20/50/70;<br>DAS28-CRP $<$ 2.6;<br>$\Delta$ DAS28-CRP                                            | 56.1;41.8;65.4;2.6     |                                    | 0.797; 0.835;<br>0.568; 0.369;<br>0.966;                                                                                                  |
|                                                            | High risk: COBRA Slim        | 98                  |                 |                        |                                                                                                      | 60.2;36.7;73.5;2.6     |                                    |                                                                                                                                           |
|                                                            | High risk: COBRA Avant Garde | 93                  |                 |                        |                                                                                                      | 59.1;44.1;73.1;2.6     |                                    |                                                                                                                                           |
| Stamp 2018 [145]                                           | MTX + Folic acid 5mg/week    | 22                  | 24              |                        | $\Delta$ DAS28-CRP                                                                                   | -0.13                  | 0.11                               | -0.73 to 0.95;                                                                                                                            |
|                                                            | MTX + Folic acid 0.8mg/week  | 18                  |                 |                        |                                                                                                      | -0.25                  |                                    |                                                                                                                                           |

## Section 4: References

1. Damjanov N, Tlustochowicz M, Aelion J, Greenwald M, Diehl A, Bhattacharya I, et al. Safety and Efficacy of SBI-087, a Subcutaneous Agent for B Cell Depletion, in Patients with Active Rheumatoid Arthritis: Results from a Phase II Randomized, Double-blind, Placebo-controlled Study. *Journal of Rheumatology*. 2016 12; 43(12):2094-2100.
2. Aletaha D, Bingham CO, 3rd, Tanaka Y, Agarwal P, Kurrasch R, Tak PP, et al. Efficacy and safety of sirukumab in patients with active rheumatoid arthritis refractory to anti-TNF therapy (SIRROUND-T): a randomised, double-blind, placebo-controlled, parallel-group, multinational, phase 3 study. [Erratum appears in *Lancet*. 2017 May 20;389(10083):1980; PMID: 28534752]. *Lancet*. 2017 03 25; 389(10075):1206-1217.
3. Tanaka Y, Bingham C, Aletaha D, Agarwal P, Popik S, Kurrasch R, et al. Sirukumab, an anti-IL-6 cytokine monoclonal antibody, significantly improves physical function and reduces morning stiffness in patients with active rheumatoid arthritis despite anti-TNF therapy: results from a global, randomized, placebo-controlled, phase 3 trial. *Arthritis and rheumatology Conference: american college of rheumatology/association of rheumatology health professionals annual scientific meeting, ACR/ARHP 2016 United states Conference start: 20161111 Conference end: 20161116*. 2016; 68:2008-2009.
4. Tanaka Y, Aletaha D, Peterson S, Ganguly R, Kurrasch R, Popik S, et al. Work productivity and general health status improvements with sirukumab, an anti-IL-6 cytokine monoclonal antibody, in patients with active rheumatoid arthritis despite anti-TNF therapy: results from the phase 3 sirround-T study. *Value in health Conference: ISPOR 22nd annual international meeting United states*. 2017; 20(5):A149.
5. Buckley C, Campos JAS, Yakushin S, Zhdan V, Davy K, Inman D, et al. A phase IIb dose-ranging study of anti-GM-CSF with methotrexate treatment in patients with rheumatoid arthritis (RA) and an inadequate response to methotrexate. *Arthritis and Rheumatology*. 2018; 70:2166-2167.
6. Gupta A, Zecchin C, Fischeleva E, Layton M, Zamuner S. Exposure-efficacy analysis in DMARD inadequate response rheumatoid arthritis patients treated with GSK3196165 along with methotrexate. *Arthritis and Rheumatology*. 2018; 70:2799.
7. Bi L, Li Y, He L, Xu H, Jiang Z, Wang Y, et al. Efficacy and safety of certolizumab pegol in combination with methotrexate in methotrexate-inadequate responder Chinese patients with active rheumatoid arthritis: 24-week results from a randomised, double-blind, placebo-controlled phase 3 study. *Clin Exp Rheumatol*. 2018 Aug 29; 29:29.
8. Takeuchi T, Tanaka Y, Yamanaka H, Amano K, Nagamine R, Park W, et al. Efficacy and safety of olokizumab in Asian patients with moderate-to-severe rheumatoid arthritis, previously exposed to anti-TNF therapy: Results from a randomized phase II trial. [Erratum appears in *Mod Rheumatol*. 2018 Sep;28(5):911-912; PMID: 29869893]. *Modern Rheumatology*. 2016; 26(1):15-23.
9. Smolen JS, Agarwal SK, Ilivanova E, Xu XL, Miao Y, Zhuang Y, et al. A randomised phase II study evaluating the efficacy and safety of subcutaneously administered ustekinumab and guselkumab in patients with active rheumatoid arthritis despite treatment with methotrexate. *Annals of the Rheumatic Diseases*. 2017 May; 76(5):831-839.
10. Burmester GR, McInnes IB, Kremer J, Miranda P, Korkosz M, Vencovsky J, et al. A randomised phase IIb study of mavrilimumab, a novel GM-CSF receptor alpha monoclonal antibody, in the treatment of rheumatoid arthritis. *Annals of the Rheumatic Diseases*. 2017 Jun; 76(6):1020-1030.
11. Dorner T, Weinblatt M, Van Beneden K, Dombrecht EJ, De Beuf K, Schoen P, et al. Results of a phase 2b study of vobarilizumab, an anti-interleukin-6 receptor nanobody, as monotherapy in patients with moderate to severe rheumatoid arthritis. *Annals of the rheumatic diseases Conference: annual european congress of rheumatology, EULAR 2017 Spain*. 2017; 76(Supplement 2):575.
12. Weinblatt M, Dorner T, Zeldin R, Schoen P, De Beuf K, Dombrecht E, et al. Results of a phase IIb study of vobarilizumab, an anti-interleukin 6 receptor Nanobody, in patients with moderate-to-severe rheumatoid arthritis despite treatment with methotrexate. *Journal of rheumatology Conference: 72nd annual meeting of the canadian rheumatology association, CRA 2017 Canada*. 2017; 44(6):880.

13. Fleischmann R, van Adelsberg J, Lin Y, Castelar-Pinheiro GD, Brzezicki J, Hrycaj P, et al. Sarilumab and Nonbiologic Disease-Modifying Antirheumatic Drugs in Patients With Active Rheumatoid Arthritis and Inadequate Response or Intolerance to Tumor Necrosis Factor Inhibitors. *Arthritis rheumatol*. 2017 Feb; 69(2):277-290.
14. Tahir H, Deodhar A, Genovese M, Takeuchi T, Aelion J, Van den Bosch F, et al. Secukinumab in Active Rheumatoid Arthritis after Anti-TNFalpha Therapy: A Randomized, Double-Blind Placebo-Controlled Phase 3 Study. *Rheumatol*. 2017 Dec; 4(2):475-488.
15. Takeuchi T, Thorne C, Karpouzas G, Sheng S, Xu W, Rao R, et al. Sirukumab for rheumatoid arthritis: the phase III SIRROUND-D study. *Annals of the Rheumatic Diseases*. 2017 Dec; 76(12):2001-2008.
16. Mease PJ, Jeka S, Jaller JJ, Kitumnuaypong T, Louthrenoo W, Mann H, et al. CNTO6785, a Fully Human Antiinterleukin 17 Monoclonal Antibody, in Patients with Rheumatoid Arthritis with Inadequate Response to Methotrexate: A Randomized, Placebo-controlled, Phase II, Dose-ranging Study. *Journal of Rheumatology*. 2018 Jan; 45(1):22-31.
17. Tanaka Y, Wada K, Takahashi Y, Hagino O, Van Hoogstraten H, Graham N, et al. Efficacy and safety of sarilumab plus methotrexate in a phase 3 trial in Japanese patients with active rheumatoid arthritis (KAKEHASI). *International journal of rheumatic diseases Conference: 20th asia pacific league of associations for rheumatology congress, APLAR 2018 Taiwan (republic of china)*. 2018; 21(Supplement 1):200.
18. Tanaka Y, Wada K, Takahashi Y, Hagino O, van Hoogstraten H, Graham NMH, et al. Sarilumab plus methotrexate in patients with active rheumatoid arthritis and inadequate response to methotrexate: results of a randomized, placebo-controlled phase III trial in Japan. *Arthritis Res Ther*. 2019 Mar 20; 21(1):79.
19. van Vollenhoven RF, Keystone EC, Strand V, Pacheco-Tena C, Vencovsky J, Behrens F, et al. Efficacy and safety of tregalizumab in patients with rheumatoid arthritis and an inadequate response to methotrexate: results of a phase IIb, randomised, placebo-controlled trial. *Annals of the Rheumatic Diseases*. 2018 Apr; 77(4):495-499.
20. Dokoupilova E, Aelion J, Takeuchi T, Malavolta N, Sfrikakis PP, Wang Y, et al. Secukinumab after anti-tumour necrosis factor-alpha therapy: a phase III study in active rheumatoid arthritis. *Scand J Rheumatol*. 2018 07; 47(4):276-281.
21. Takeuchi T, Yamanaka H, Harigai M, Tamamura R, Kato Y, Ukyo Y, et al. Sirukumab in rheumatoid arthritis refractory to sulfasalazine or methotrexate: a randomized phase 3 safety and efficacy study in Japanese patients. *Arthritis Res Ther*. 2018 Mar 07; 20(1):42.
22. Mazurov V, Denisov L, Gordeev I, Nesmeyanova O, Plaksina T, Ilivanova E, et al. Results of the alterra clinical trial-the efficacy of the alternative dosing regimen for rituximab biosimilar in bDMARDS naive patients with rheumatoid arthritis. *Annals of the rheumatic diseases Conference: annual european congress of rheumatology, EULAR 2018 Netherlands*. 2018; 77(Supplement 2):963.
23. Matsubara T, Inoue H, Nakajima T, Tanimura K, Sagawa A, Sato Y, et al. Abatacept in combination with methotrexate in Japanese biologic-naive patients with active rheumatoid arthritis: a randomised placebo-controlled phase IV study. *RMD Open*. 2018; 4(2):e000813.
24. Porter D, van Melckebeke J, Dale J, Messow CM, McConnachie A, Walker A, et al. Tumour necrosis factor inhibition versus rituximab for patients with rheumatoid arthritis who require biological treatment (ORBIT): an open-label, randomised controlled, non-inferiority, trial. *Lancet*. 2016 Jul 16; 388(10041):239-247.
25. Burmester GR, Lin Y, Patel R, van Adelsberg J, Mangan EK, Graham NM, et al. Efficacy and safety of sarilumab monotherapy versus adalimumab monotherapy for the treatment of patients with active rheumatoid arthritis (MONARCH): a randomised, double-blind, parallel-group phase III trial. *Annals of the Rheumatic Diseases*. 2017 May; 76(5):840-847.
26. Strand V, Gossec L, Proudfoot CWJ, Chen CI, Reaney M, Guillonneau S, et al. Patient-reported outcomes from a randomized phase III trial of sarilumab monotherapy versus adalimumab monotherapy in patients with rheumatoid arthritis. *Arthritis Res Ther*. 2018 Jun 19; 20(1):129.

27. Blanco FJ, Moricke R, Dokoupilova E, Coddling C, Neal J, Andersson M, et al. Secukinumab in Active Rheumatoid Arthritis: A Phase III Randomized, Double-Blind, Active Comparator- and Placebo-Controlled Study. *Arthritis rheumatol.* 2017 Jun; 69(6):1144-1153.
28. Weinblatt ME, McInnes IB, Kremer JM, Miranda P, Vencovsky J, Guo X, et al. A Randomized Phase IIb Study of Mavrilimumab and Golimumab in Rheumatoid Arthritis. *Arthritis rheumatol.* 2018 Jan; 70(1):49-59.
29. Genovese MC, Weinblatt ME, Aelion JA, Mansikka HT, Peloso PM, Chen K, et al. ABT-122, a Bispecific Dual Variable Domain Immunoglobulin Targeting Tumor Necrosis Factor and Interleukin-17A, in Patients With Rheumatoid Arthritis With an Inadequate Response to Methotrexate: A Randomized, Double-Blind Study. *Arthritis rheumatol.* 2018 Nov; 70(11):1710-1720.
30. Taylor PC, Schiff MH, Wang Q, Jiang Y, Zhuang Y, Kurrasch R, et al. Efficacy and safety of monotherapy with sirukumab compared with adalimumab monotherapy in biologic-naïve patients with active rheumatoid arthritis (SIRROUND-H): A randomised, double-blind, parallel-group, multinational, 52-week, phase 3 study. *Annals of the Rheumatic Diseases.* 2018; 77(5):658-666.
31. Smolen JS, Burmester GR, Combe B, Curtis JR, Hall S, Haraoui B, et al. Head-to-head comparison of certolizumab pegol versus adalimumab in rheumatoid arthritis: 2-year efficacy and safety results from the randomised EXXELERATE study.[Erratum appears in *Lancet.* 2017 Feb 4;389(10068):e2; PMID: 28117089]. *Lancet.* 2016 12 03; 388(10061):2763-2774.
32. Gottenberg JE, Brocq O, Perdriger A, Lassoued S, Berthelot JM, Wendling D, et al. NonTNF-targeted biologic vs a second anti-TNF drug to treat rheumatoid arthritis in patients with insufficient response to a first anti-TNF drug: A randomized clinical trial. *JAMA - Journal of the American Medical Association.* 2016; 316(11):1172-1180.
33. Verschuere P, Emery P, Van Hoogstraten H, Dong Q, Mangan EK, Den Broeder A. Efficacy of sarilumab in patients with rheumatoid arthritis with and without previous response to tocilizumab. *Annals of the rheumatic diseases Conference: annual european congress of rheumatology, EULAR 2018 Netherlands.* 2018; 77(Supplement 2):327-328.
34. Emery P, Bingham CO, 3rd, Burmester GR, Bykerk VP, Furst DE, Mariette X, et al. Certolizumab pegol in combination with dose-optimised methotrexate in DMARD-naïve patients with early, active rheumatoid arthritis with poor prognostic factors: 1-year results from C-EARLY, a randomised, double-blind, placebo-controlled phase III study. *Annals of the Rheumatic Diseases.* 2017 Jan; 76(1):96-104.
35. Emery P, Tanaka Y, Bykerk VP, Huizinga TWJ, Citera G, Nys M, et al. Efficacy and Safety of Abatacept in Combination with MTX in Early, MTX-Naïve, Anti-Citrullinated Protein Antibody-Positive Patients with RA: Primary and 1-Year Results from a Phase IIIb Study. 2018 ACR/ARHP Annual Meeting Chicago, USA; 2018 2018: *Arthritis Rheumatol.*; 2018.
36. Stamm TA, Machold KP, Aletaha D, Alasti F, Lipsky P, Pisetsky D, et al. Induction of sustained remission in early inflammatory arthritis with the combination of infliximab plus methotrexate: The DINORA trial. *Arthritis Research and Therapy.* 2018; 20(1).
37. Burmester GR, Rigby WF, van Vollenhoven RF, Kay J, Rubbert-Roth A, Kelman A, et al. Tocilizumab in early progressive rheumatoid arthritis: FUNCTION, a randomised controlled trial. *Annals of the Rheumatic Diseases.* 2016 Jun; 75(6):1081-1091.
38. Burmester GR, Rigby WF, van Vollenhoven RF, Kay J, Rubbert-Roth A, Blanco R, et al. Tocilizumab combination therapy or monotherapy or methotrexate monotherapy in methotrexate-naïve patients with early rheumatoid arthritis: 2-year clinical and radiographic results from the randomised, placebo-controlled FUNCTION trial. *Annals of the Rheumatic Diseases.* 2017 Jul; 76(7):1279-1284.
39. Moller-Bisgaard S, Horslev-Petersen K, Ejbjerg B, Hetland ML, Ornbjerg LM, Glinatsi D, et al. Effect of Magnetic Resonance Imaging vs Conventional Treat-to-Target Strategies on Disease Activity Remission and Radiographic Progression in Rheumatoid Arthritis: The IMAGINE-RA Randomized Clinical Trial. *JAMA.* 2019 02 05; 321(5):461-472.
40. Mueller RB, Spaeth M, von Restorff C, Ackermann C, Schulze-Koops H, von Kempis J. Superiority of a Treat-to-Target Strategy over Conventional Treatment with Fixed csDMARD and Corticosteroids: A Multi-Center Randomized Controlled Trial in RA Patients with an Inadequate

Response to Conventional Synthetic DMARDs, and New Therapy with Certolizumab Pegol. *Journal of Clinical Medicine*. 2019 Mar 03; 8(3):03.

41. Oba K, Horie N, Sato N, Saito K, Takeuchi T, Mimori T, et al. Remission induction by Raising the dose of Remicade in RA (RRRR) study: Rationale and study protocol for a randomized controlled trial comparing for sustained clinical remission after discontinuation of infliximab in patients with rheumatoid arthritis. *Contemp Clin Trials Commun*. 2017 Dec; 8:49-54.
42. Tanaka Y, Oba K, Koike T, Miyasaka N, Mimori T, Takeuchi T, et al. Sustained clinical remission after discontinuation of infliximab with a raising dose strategy in patients with rheumatoid arthritis (RRRR study): A randomized controlled trial. *Arthritis and Rheumatology*. 2018; 70:3170-3172.
43. Chatzidionysiou K, Turesson C, Teleman A, Knight A, Lindqvist E, Larsson P, et al. A multicentre, randomised, controlled, open-label pilot study on the feasibility of discontinuation of adalimumab in established patients with rheumatoid arthritis in stable clinical remission. *RMD Open*. 2016; 2(1):e000133.
44. Ghiti Moghadam M, Vonkeman HE, Ten Klooster PM, Tekstra J, van Schaardenburg D, Starmans-Kool M, et al. Stopping Tumor Necrosis Factor Inhibitor Treatment in Patients With Established Rheumatoid Arthritis in Remission or With Stable Low Disease Activity: A Pragmatic Multicenter, Open-Label Randomized Controlled Trial. *Arthritis rheumatol*. 2016 Aug; 68(8):1810-1817.
45. Ghiti Moghadam M, ten Klooster PM, Vonkeman HE, Kneepkens EL, Klaasen R, Stolk JN, et al. Impact of Stopping Tumor Necrosis Factor Inhibitors on Rheumatoid Arthritis Patients' Burden of Disease. *Arthritis Care and Research*. 2018; 70(4):516-524.
46. Emery P, Burmester GR, Bykerk VP, Combe BG, Furst DE, Maldonado MA, et al. Re-treatment with abatacept plus methotrexate for disease flare after complete treatment withdrawal in patients with early rheumatoid arthritis: 2-year results from the AVERT study. *RMD Open*. 2019; 5(1).
47. Atsumi T, Tanaka Y, Yamamoto K, Takeuchi T, Yamanaka H, Ishiguro N, et al. Clinical benefit of 1-year certolizumab pegol (CZP) add-on therapy to methotrexate treatment in patients with early rheumatoid arthritis was observed following CZP discontinuation: 2-year results of the C-OPERA study, a phase III randomised trial. *Annals of the Rheumatic Diseases*. 2017 Aug; 76(8):1348-1356.
48. Kaneko Y, Kato M, Tanaka Y, Inoo M, Kobayashi-Haraoka H, Amano K, et al. Tocilizumab discontinuation after attaining remission in patients with rheumatoid arthritis who were treated with tocilizumab alone or in combination with methotrexate: results from a prospective randomised controlled study (the second year of the SURPRISE study). *Annals of the Rheumatic Diseases*. 2018 Sep; 77(9):1268-1275.
49. Weinblatt ME, Bingham CO, 3rd, Burmester GR, Bykerk VP, Furst DE, Mariette X, et al. A Phase III Study Evaluating Continuation, Tapering, and Withdrawal of Certolizumab Pegol After One Year of Therapy in Patients With Early Rheumatoid Arthritis. *Arthritis rheumatol*. 2017 10; 69(10):1937-1948.
50. Ibrahim F, Lorente-Canovas B, Dore CJ, Bosworth A, Ma MH, Galloway JB, et al. Optimizing treatment with tumour necrosis factor inhibitors in rheumatoid arthritis—a proof of principle and exploratory trial: is dose tapering practical in good responders? *Rheumatology (Oxford)*. 2017 11 01; 56(11):2004-2014.
51. Akdemir G, Heimans L, Bergstra SA, Goekoop RJ, van Oosterhout M, van Groenendael J, et al. Clinical and radiological outcomes of 5-year drug-free remission-steered treatment in patients with early arthritis: IMPROVED study. *Annals of the Rheumatic Diseases*. 2018 Jan; 77(1):111-118.
52. El Miedany Y, El Gaafary M, Youssef S, Ahmed I, Bahlas S, Hegazi M, et al. Optimizing therapy in inflammatory arthritis: prediction of relapse after tapering or stopping treatment for rheumatoid arthritis patients achieving clinical and radiological remission. *Clinical Rheumatology*. 2016 Dec; 35(12):2915-2923.
53. Van Mulligen E, Weel A, Kuijper TM, Luime JJ, Hazes JMW, De Jong PHP. Gradual tapering tnf blockers versus conventional synthetic dmards in patients with rheumatoid arthritis in sustained remission: first year results of the randomised controlled tara-study. *Annals of the rheumatic diseases Conference: annual european congress of rheumatology, EULAR 2018 Netherlands*. 2018; 77(Supplement 2):107.

54. Methotrexate dosage reduction upon adalimumab initiation: clinical and ultrasonographic outcomes from the randomized noninferiority MUSICA trial. *Journal of rheumatology* 43 (8) (pp 1480-1489), 2016 Date of publication: august 2016. 2016.
55. Keystone EC, Pope JE, Thorne JC, Poulin-Costello M, Phan-Chronis K, Vieira A, et al. Two-year radiographic and clinical outcomes from the Canadian Methotrexate and Etanercept Outcome study in patients with rheumatoid arthritis. *Rheumatology (Oxford)*. 2016 Feb; 55(2):327-334.
56. Pope J, Rampakakis E, Grant E, Bessette L, Lazovskis J, Haraoui B, et al. DMARD withdrawal in ra patients achieving therapeutic response with certolizumab pegol combined with DMARDs: interim results from a canadian observational randomized study. *Annals of the rheumatic diseases Conference: annual european congress of rheumatology, EULAR 2017 Spain*. 2017; 76(Supplement 2):58.
57. Pope JE, Rampakakis E, Vaillancourt J, Grant E, Bessette L, Lazovskis J, et al. DMARD Withdrawal in RA Patients Achieving Therapeutic Response with Certolizumab Pegol Combined with Dmards: Results from a Canadian Randomized Study - ACR Meeting Abstracts. 2018 ACR/ARHP Annual Meeting Chicago, USA; 2018 2018: Arthritis Rheumatol.; 2018.
58. Burmester GR, Buttgereit F, Bernasconi C, Alvaro-Gracia JM, Castro N, Dougados M, et al. A Randomized Controlled 24-Week Trial Evaluating the Safety and Efficacy of Blinded Tapering Versus Continuation of Long-Term Prednisone (5 mg/day) in Patients with Rheumatoid Arthritis Who Achieved Low Disease Activity or Remission on Tocilizumab. 2018 ACR/ARHP Annual Meeting Chicago, USA; 2018 2018: Arthritis Rheumatol.; 2018.
59. Pablos JL, Navarro F, Blanco FJ, Roman-Ivorra JA, Alonso A, Martin Mola E, et al. Efficacy of tocilizumab monotherapy after response to combined tocilizumab and methotrexate in patients with rheumatoid arthritis: the randomised JUST-ACT study. *Clin Exp Rheumatol*. 2019 May-Jun; 37(3):437-444.
60. Kremer JM, Rigby W, Singer NG, Birchwood C, Gill D, Reiss W, et al. Sustained Response Following Discontinuation of Methotrexate in Patients With Rheumatoid Arthritis Treated With Subcutaneous Tocilizumab: Results From a Randomized, Controlled Trial. *Arthritis rheumatol*. 2018 Aug; 70(8):1200-1208.
61. Edwards CJ, Ostor AJK, Naisbett-Groet B, Kiely P. Tapering versus steady-state methotrexate in combination with tocilizumab for rheumatoid arthritis: a randomized, double-blind trial. *Rheumatology (Oxford)*. 2018 01 01; 57(1):84-91.
62. Stouten V, Michiels S, Belba A, Westhovens R, Verschueren P. Effectiveness of a randomized step-down to methotrexate or leflunomide maintenance therapy in patients with low disease activity, 40 weeks after starting combined methotrexate-leflunomide remission induction therapy in early rheumatoid arthritis: results from the carera trial. *Annals of the rheumatic diseases Conference: annual european congress of rheumatology, EULAR 2018 Netherlands*. 2018; 77(Supplement 2):967-968.
63. Urata Y, Abe S, Devers B, Nakamura Y, Takemoto H, Furukawa KI. A novel dose reduction therapy using biological disease-modifying anti-rheumatic drugs to target matrix metalloproteinase 3 normalization together with a simplified disease activity index <3.3 yields effects non-inferior to standard care in rheumatoid arthritis with regards maintaining remission. *Annals of the rheumatic diseases Conference: annual european congress of rheumatology of the european league against rheumatism, EULAR 2016 United kingdom Conference start: 20160608 Conference end: 20160611*. 2016; 75:204-205.
64. Bouman CA, van Herwaarden N, van den Hoogen FH, Fransen J, van Vollenhoven RF, Bijlsma JW, et al. Long-term outcomes after disease activity-guided dose reduction of TNF inhibition in rheumatoid arthritis: 3-year data of the DRESS study - a randomised controlled pragmatic non-inferiority strategy trial. *Annals of the Rheumatic Diseases*. 2017 Oct; 76(10):1716-1722.
65. l'Ami MJ, Krieckaert CL, Nurmohamed MT, van Vollenhoven RF, Rispen T, Boers M, et al. Successful reduction of overexposure in patients with rheumatoid arthritis with high serum adalimumab concentrations: an open-label, non-inferiority, randomised clinical trial. *Annals of the Rheumatic Diseases*. 2018 Apr; 77(4):484-487.

66. Fleischmann RM, Damjanov NS, Kivitz AJ, Legedza A, Hooock T, Kinnman N. A randomized, double-blind, placebo-controlled, twelve-week, dose-ranging study of decernotinib, an oral selective JAK-3 inhibitor, as monotherapy in patients with active rheumatoid arthritis. *Arthritis rheumatol.* 2015 Feb; 67(2):334-343.
67. Genovese MC, Yang F, Ostergaard M, Kinnman N. Efficacy of VX-509 (decernotinib) in combination with a disease-modifying antirheumatic drug in patients with rheumatoid arthritis: clinical and MRI findings. *Annals of the Rheumatic Diseases.* 2016 Nov; 75(11):1979-1983.
68. Genovese MC, van Vollenhoven RF, Pacheco-Tena C, Zhang Y, Kinnman N. VX-509 (Decernotinib), an Oral Selective JAK-3 Inhibitor, in Combination With Methotrexate in Patients With Rheumatoid Arthritis. *Arthritis rheumatol.* 2016 Jan; 68(1):46-55.
69. Takeuchi T, Tanaka Y, Iwasaki M, Ishikura H, Saeki S, Kaneko Y. Efficacy and safety of the oral Janus kinase inhibitor peficitinib (ASP015K) monotherapy in patients with moderate to severe rheumatoid arthritis in Japan: a 12-week, randomised, double-blind, placebo-controlled phase IIb study. *Annals of the Rheumatic Diseases.* 2016 Jun; 75(6):1057-1064.
70. Genovese MC, Greenwald M, Coddling C, Zubrzycka-Sienkiewicz A, Kivitz AJ, Wang A, et al. Peficitinib, a JAK Inhibitor, in Combination With Limited Conventional Synthetic Disease-Modifying Antirheumatic Drugs in the Treatment of Moderate-to-Severe Rheumatoid Arthritis. *Arthritis rheumatol.* 2017 May; 69(5):932-942.
71. Kivitz AJ, Gutierrez-Urena SR, Poiley J, Genovese MC, Kristy R, Shay K, et al. Peficitinib, a JAK Inhibitor, in the Treatment of Moderate-to-Severe Rheumatoid Arthritis in Patients With an Inadequate Response to Methotrexate. *Arthritis rheumatol.* 2017 Apr; 69(4):709-719.
72. Tanaka Y, Takeuchi T, Tanaka S, Kawakami A, Iwasaki M, Song YW, et al. Efficacy and Safety of the Novel Oral Janus Kinase (JAK) Inhibitor, Peficitinib (ASP015K), in a Phase 3, Double-Blind, Placebo-Controlled, Randomized Study of Patients with RA Who Had an Inadequate Response to Dmards. 2018 ACR/ARHP Annual Meeting Chicago, USA; 2018: Arthritis & Rheumatology; 2018.
73. Tanaka Y, Takeuchi T, Tanaka S, Kawakami A, Iwasaki M, Song YW, et al. Efficacy and safety of peficitinib (ASP015K) in patients with rheumatoid arthritis and an inadequate response to conventional DMARDs: a randomised, double-blind, placebo-controlled phase III trial (RAJ3). *Ann Rheum Dis.* 2019 Oct; 78(10):1320-1332.
74. Takeuchi T, Tanaka Y, Tanaka S, Kawakami A, Iwasaki M, Rokuda M, et al. Efficacy and safety of the novel oral Janus kinase (JAK) inhibitor, peficitinib (ASP015K), in a phase 3, double-blind, placebo-controlled, randomized study of patients with RA who had an inadequate response to methotrexate. 2018 ACR/ARHP Annual Meeting Chicago, USA; 2018: Arthritis & Rheumatology; 2018.
75. Takeuchi T, Tanaka Y, Tanaka S, Kawakami A, Iwasaki M, Katayama K, et al. Efficacy and safety of peficitinib (ASP015K) in patients with rheumatoid arthritis and an inadequate response to methotrexate: results of a phase III randomised, double-blind, placebo-controlled trial (RAJ4) in Japan. *Ann Rheum Dis.* 2019 Oct; 78(10):1305-1319.
76. Westhovens R, Taylor PC, Alten R, Pavlova D, Enriquez-Sosa F, Mazur M, et al. Filgotinib (GLPG0634/GS-6034), an oral JAK1 selective inhibitor, is effective in combination with methotrexate (MTX) in patients with active rheumatoid arthritis and insufficient response to MTX: results from a randomised, dose-finding study (DARWIN 1). *Annals of the Rheumatic Diseases.* 2017 Jun; 76(6):998-1008.
77. Kavanaugh A, Kremer J, Ponce L, Cseuz R, Reshetko OV, Stanislavchuk M, et al. Filgotinib (GLPG0634/GS-6034), an oral selective JAK1 inhibitor, is effective as monotherapy in patients with active rheumatoid arthritis: results from a randomised, dose-finding study (DARWIN 2). *Annals of the Rheumatic Diseases.* 2017 Jun; 76(6):1009-1019.
78. van Vollenhoven R, Takeuchi T, Pangan AL, Friedman A, Mohamed M, Chen S, et al. A Phase 3, Randomized, Controlled Trial Comparing Upadacitinib Monotherapy to MTX Monotherapy in MTX-Naïve Patients with Active Rheumatoid Arthritis - ACR Meeting Abstracts. 2018 ACR/ARHP Annual Meeting Chicago, USA; 2018 2018: Arthritis Rheumatol.; 2018.

79. Genovese M, Westhovens R, Meuleners L, Van der Aa A, Harrison P, Tasset C, et al. Effect of filgotinib, a selective JAK 1 inhibitor, with and without methotrexate in patients with rheumatoid arthritis: patient-reported outcomes. *Arthritis Res Ther*. 2018 Mar 23; 20(1):57.
80. Kivitz A, Mehta D, Matzkies F, Mozaffarian A, Kunder R, Paolo JAD, et al. GS-9876, a Novel, Highly Selective, SYK Inhibitor in Patients with Active Rheumatoid Arthritis: Safety, Tolerability and Efficacy Results of a Phase 2 Study. *2018 ACR/ARHP Annual Meeting Chicago, USA: Arthritis & Rheumatology* 2018.
81. Takeuchi T, Genovese MC, Haraoui B, Li Z, Xie L, Klar R, et al. Dose reduction of baricitinib in patients with rheumatoid arthritis achieving sustained disease control: results of a prospective study. *Annals of the Rheumatic Diseases*. 2019 Feb; 78(2):171-178.
82. Tanaka Y, Sugiyama N, Toyozumi S, Lukic T, Lamba M, Zhang R, et al. Modified- versus immediate-release tofacitinib in Japanese rheumatoid arthritis patients: a randomized, phase III, non-inferiority study. *Rheumatology (Oxford)*. 2019 Jan 01; 58(1):70-79.
83. van der Heijde D, Strand V, Tanaka Y, Keystone E, Kremer J, Zerbini CAF, et al. Tofacitinib in Combination with Methotrexate in Patients with Rheumatoid Arthritis: Clinical Efficacy, Radiographic and Safety Outcomes from the 24-Month Phase 3 ORAL Scan Study. *Arthritis rheumatol*. 2019 Jan 22; 22:22.
84. Dougados M, van der Heijde D, Chen YC, Greenwald M, Drescher E, Liu J, et al. Baricitinib in patients with inadequate response or intolerance to conventional synthetic DMARDs: results from the RA-BUILD study. *Annals of the Rheumatic Diseases*. 2017 Jan; 76(1):88-95.
85. Genovese M, Van Der Heijde D, Dougados M, Chen Y, Greenwald M, Drescher E, et al. Baricitinib inhibits radiographic progression of structural joint damage at 1 year in patients with rheumatoid arthritis (RA) and an inadequate response to conventional synthetic disease-modifying antirheumatic drugs (CSDMARDs). *Internal medicine journal Conference: new zealand rheumatology association and australian rheumatology association with the rheumatology health professionals association joint annual scientific meeting New zealand*. 2017; 47:32.
86. Fleischmann R, Schiff M, van der Heijde D, Ramos-Remus C, Spindler A, Stanislav M, et al. Baricitinib, Methotrexate, or Combination in Patients With Rheumatoid Arthritis and No or Limited Prior Disease-Modifying Antirheumatic Drug Treatment. *Arthritis rheumatol*. 2017 Mar; 69(3):506-517.
87. Schiff M, Takeuchi T, Fleischmann R, Gaich CL, DeLozier AM, Schlichting D, et al. Patient-reported outcomes of baricitinib in patients with rheumatoid arthritis and no or limited prior disease-modifying antirheumatic drug treatment. *Arthritis Res Ther*. 2017 09 18; 19(1):208.
88. Smolen JS, Kremer JM, Gaich CL, DeLozier AM, Schlichting DE, Xie L, et al. Patient-reported outcomes from a randomised phase III study of baricitinib in patients with rheumatoid arthritis and an inadequate response to biological agents (RA-BEACON). *Annals of the Rheumatic Diseases*. 2017 04; 76(4):694-700.
89. Tanaka Y, Takeuchi T, Yamaoka K, Oribe M, Kawano M, Zhou Y, et al. A phase 2b/3 randomised, placebo-controlled, double-blind study of upadacitinib, a selective jak1 inhibitor, in Japanese patients with active rheumatoid arthritis and inadequate response to conventional synthetic DMARDs. *Annals of the rheumatic diseases Conference: annual european congress of rheumatology, EULAR 2018 Netherlands*. 2018; 77(Supplement 2):991-992.
90. van der Heijde D, Dougados M, Chen YC, Greenwald M, Drescher E, Klar R, et al. Effects of baricitinib on radiographic progression of structural joint damage at 1 year in patients with rheumatoid arthritis and an inadequate response to conventional synthetic disease-modifying antirheumatic drugs. *RMD Open*. 2018; 4(1):e000662.
91. Hu J, Bao C, Li X, Spindler A, Zhang X, Xu J, et al. Efficacy and safety of baricitinib in MTX-IR patients with rheumatoid arthritis: 52 week results from a phase 3 study (RA-balance). *Annals of the rheumatic diseases Conference: annual european congress of rheumatology, EULAR 2018 Netherlands*. 2018; 77(Supplement 2):969-970.
92. Yue Y, Hu J, Bao C, Li X, Spindler AJ, Zhang X, et al. Patient-reported outcomes from a phase 3 study (RA-BALANCE) of baricitinib versus placebo in rheumatoid arthritis. *International journal of*



- rheumatic diseases Conference: 20th asia pacific league of associations for rheumatology congress, APLAR 2018 Taiwan (republic of china). 2018; 21(Supplement 1):40.
93. Genovese MC, Fleischmann R, Combe B, Hall S, Rubbert-Roth A, Zhang Y, et al. Safety and efficacy of upadacitinib in patients with active rheumatoid arthritis refractory to biologic disease-modifying anti-rheumatic drugs (SELECT-BEYOND): a double-blind, randomised controlled phase 3 trial. *Lancet*. 2018 06 23; 391(10139):2513-2524.
94. Strand V, Schiff M, Tundia N, Friedman A, Meerwein S, Pangan A, et al. Patient reported outcomes of upadacitinib: results from biologic inadequate responders (select beyond phase iii trial). *Annals of the rheumatic diseases Conference: annual european congress of rheumatology, EULAR 2018 Netherlands*. 2018; 77(Supplement 2):990.
95. Burmester GR, Kremer JM, Van den Bosch F, Kivitz A, Bessette L, Li Y, et al. Safety and efficacy of upadacitinib in patients with rheumatoid arthritis and inadequate response to conventional synthetic disease-modifying anti-rheumatic drugs (SELECT-NEXT): a randomised, double-blind, placebo-controlled phase 3 trial. *Lancet*. 2018 06 23; 391(10139):2503-2512.
96. Smolen J, Cohen S, Emery P, Rigby W, Tanaka Y, Zhang Y, et al. Upadacitinib as monotherapy: a phase 3 randomised controlled double-blind study in patients with active rheumatoid arthritis and inadequate response to methotrexate. *Annals of the rheumatic diseases Conference: annual european congress of rheumatology, EULAR 2018 Netherlands*. 2018; 77(Supplement 2):67-68.
97. Smolen J, Cohen S, Emery P, Rigby W, Tanaka Y, Zhang Y, et al. Upadacitinib As Monotherapy: A Phase 3 Randomized Controlled Double-Blind Study in Patients with Active Rheumatoid Arthritis and Inadequate Response to Methotrexate. *2018 ACR/ARHP Annual Meeting Chicago, USA: Arthritis & Rheumatology 2018*.
98. Strand V, Buch M, Tundia N, Camp HS, Suboticki J, Goldschmidt D, et al. Upadacitinib Monotherapy Improves Patient-Reported Outcomes in Patients with Rheumatoid Arthritis and Inadequate Response to Methotrexate. *2018 ACR/ARHP Annual Meeting Chicago, USA: Arthritis & Rheumatology 2018*.
99. Smolen JS, Pangan AL, Emery P, Rigby W, Tanaka Y, Vargas JI, et al. Upadacitinib as monotherapy in patients with active rheumatoid arthritis and inadequate response to methotrexate (SELECT-MONOTHERAPY): a randomised, placebo-controlled, double-blind phase 3 study. *Lancet*. 2019 Jun 8; 393(10188):2303-2311.
100. Strand V, Pope J, Tundia N, Friedman A, Camp HS, Pangan A, et al. Upadacitinib improves patient-reported outcomes in patients with rheumatoid arthritis and inadequate response to conventional synthetic disease-modifying anti-rheumatic drugs: results from selectnext. *Annals of the rheumatic diseases Conference: annual european congress of rheumatology, EULAR 2018 Netherlands*. 2018; 77(Supplement 2):989-990.
101. Taylor PC, Keystone EC, van der Heijde D, Weinblatt ME, Del Carmen Morales L, Reyes Gonzaga J, et al. Baricitinib versus Placebo or Adalimumab in Rheumatoid Arthritis. *New England Journal of Medicine*. 2017 02 16; 376(7):652-662.
102. Keystone EC, Taylor PC, Tanaka Y, Gaich C, DeLozier AM, Dudek A, et al. Patient-reported outcomes from a phase 3 study of baricitinib versus placebo or adalimumab in rheumatoid arthritis: secondary analyses from the RA-BEAM study. *Annals of the Rheumatic Diseases*. 2017 Nov; 76(11):1853-1861.
103. Strand V, Mysler E, Moots RJ, Wallenstein G, DeMasi R, Gruben D, et al. Tofacitinib with and without methotrexate versus adalimumab with methotrexate for the treatment of rheumatoid arthritis: patient-reported outcomes from a phase 3b/4 randomised trial. *Annals of the rheumatic diseases Conference: annual european congress of rheumatology, EULAR 2018 Netherlands*. 2018; 77(Supplement 2):990-991.
104. Fleischmann R, Pangan AL, Mysler E, Bessette L, Peterfy C, Durez P, et al. A phase 3, randomized, double-blind study comparing upadacitinib to placebo and to adalimumab, in patients with active rheumatoid arthritis with inadequate response to methotrexate. *2018 ACR/ARHP Annual Meeting Chicago, USA; 2018: Arthritis & Rheumatology; 2018*.
105. Fleischmann R, Pangan AL, Song IH, Mysler E, Bessette L, Peterfy C, et al. Upadacitinib Versus Placebo or Adalimumab in Patients With Rheumatoid Arthritis and an Inadequate Response to

Methotrexate: Results of a Phase III, Double-Blind, Randomized Controlled Trial. *Arthritis rheumatol.* 2019 Nov; 71(11):1788-1800.

106. Fleischmann R, Mysler E, Hall S, Kivitz AJ, Moots RJ, Luo Z, et al. Efficacy and safety of tofacitinib monotherapy, tofacitinib with methotrexate, and adalimumab with methotrexate in patients with rheumatoid arthritis (ORAL Strategy): a phase 3b/4, double-blind, head-to-head, randomised controlled trial. *Lancet.* 2017 07 29; 390(10093):457-468.
107. O'Dell J, Takeuchi T, Tanaka Y, Louw I, Tiabut T, Kai M, et al. OP0226 Randomized, Double-Blind Study Comparing Chs-0214 with Etanercept in Patients with Active Rheumatoid Arthritis (RA) despite Methotrexate (MTX) Therapy. *Annals of the Rheumatic Diseases.* 2016; 75(Suppl 2):143-143.
108. Jani RH, Gupta R, Bhatia G, Rathi G, Ashok Kumar P, Sharma R, et al. A prospective, randomized, double-blind, multicentre, parallel-group, active controlled study to compare efficacy and safety of biosimilar adalimumab (Exemptia; ZRC-3197) and adalimumab (Humira) in patients with rheumatoid arthritis. *International Journal of Rheumatic Diseases.* 2016 Nov; 19(11):1157-1168.
109. Lila A, Denisov L, Plaksina T, Smakotina S, Kunder E, Soroka N, et al. Efficacy and safety of BCD-055 (infliximab biosimilar) in rheumatoid arthritis. results of BCD-055-3/lira phase 3 clinical study. *Annals of the rheumatic diseases Conference: annual european congress of rheumatology, EULAR 2018 Netherlands.* 2018; 77(Supplement 2):316-317.
110. Lila AM, Mazurov VI, Denisov LN, Nesmeyanova OB, Ilivanova EP, Eremeeva AV, et al. A phase III study of BCD-055 compared with innovator infliximab in patients with active rheumatoid arthritis: 54-week results from the LIRA study. *Rheumatol Int.* 2019 Sep; 39(9):1537-1546.
111. Wiland Piotr, Jeka Sławomir, Dokoupilová Eva, Limón Juan Manuel Miranda, Jauch-Lembach Julia, Thakur Anjali, et al. A Randomized, Double-Blind, Parallel-Group, Multicenter Study to Compare the Efficacy, Safety and Immunogenicity of a Proposed Adalimumab Biosimilar (GP2017) with Reference Adalimumab in Patients with Moderate-to-Severe Active Rheumatoid Arthritis. 2018 ACR/ARHP Annual Meeting Chicago, USA; 2018: Arthritis & Rheumatology; 2018.
112. Matsuno H, Matsubara T. A randomized double-blind parallel-group phase III study to compare the efficacy and safety of NI-071 and infliximab reference product in Japanese patients with active rheumatoid arthritis refractory to methotrexate. *Modern Rheumatology.* 2018 Oct 05:1-26.
113. Yoo DH, Racewicz A, Brzezicki J, Yatsyshyn R, Arteaga ET, Baranauskaite A, et al. A phase III randomized study to evaluate the efficacy and safety of CT-P13 compared with reference infliximab in patients with active rheumatoid arthritis: 54-week results from the PLANETRA study. *Arthritis Res Ther.* 2016 Apr 02; 18:82.
114. Bae SC, Kim J, Choe JY, Park W, Lee SH, Park YB, et al. A phase III, multicentre, randomised, double-blind, active-controlled, parallel-group trial comparing safety and efficacy of HD203, with innovator etanercept, in combination with methotrexate, in patients with rheumatoid arthritis: the HERA study. *Annals of the Rheumatic Diseases.* 2017 Jan; 76(1):65-71.
115. Jamshidi A, Gharibdoost F, Vojdanian M, Soroosh SG, Soroush M, Ahmadzadeh A, et al. A phase III, randomized, two-armed, double-blind, parallel, active controlled, and non-inferiority clinical trial to compare efficacy and safety of biosimilar adalimumab (CinnoRA) to the reference product (Humira) in patients with active rheumatoid arthritis. *Arthritis Res Ther.* 2017 07 20; 19(1):168.
116. Smolen JS, Cohen SB, Tony HP, Scheinberg M, Kivitz A, Balanescu A, et al. A randomised, double-blind trial to demonstrate bioequivalence of GP2013 and reference rituximab combined with methotrexate in patients with active rheumatoid arthritis. *Annals of the Rheumatic Diseases.* 2017 Sep; 76(9):1598-1602.
117. Choe JY, Prodanovic N, Niebrzydowski J, Staykov I, Dokoupilova E, Baranauskaite A, et al. A randomised, double-blind, phase III study comparing SB2, an infliximab biosimilar, to the infliximab reference product Remicade in patients with moderate to severe rheumatoid arthritis despite methotrexate therapy. *Annals of the Rheumatic Diseases.* 2017 Jan; 76(1):58-64.
118. Smolen JS, Choe JY, Prodanovic N, Niebrzydowski J, Staykov I, Dokoupilova E, et al. Comparing biosimilar SB2 with reference infliximab after 54 weeks of a double-blind trial: clinical, structural and safety results. *Rheumatology (Oxford).* 2017 10 01; 56(10):1771-1779.

119. Cohen S, Genovese MC, Choy E, Perez-Ruiz F, Matsumoto A, Pavelka K, et al. Efficacy and safety of the biosimilar ABP 501 compared with adalimumab in patients with moderate to severe rheumatoid arthritis: a randomised, double-blind, phase III equivalence study. *Annals of the Rheumatic Diseases*. 2017 Oct; 76(10):1679-1687.
120. Alten R, Glover J, Matsunaga N, Chisholm D, Genovese M. Efficacy and safety results of a phase III study comparing FKB327, an adalimumab biosimilar, with the adalimumab reference product in patients with active rheumatoid arthritis. *Annals of the rheumatic diseases Conference: annual european congress of rheumatology, EULAR 2017 Spain*. 2017; 76(Supplement 2):59.
121. Genovese MC, Glover J, Greenwald M, Porawska W, El Khouri EC, Dokoupilova E, et al. FKB327, an adalimumab biosimilar, versus the reference product: results of a randomized, Phase III, double-blind study, and its open-label extension. *Arthritis Res Ther*. 2019 Dec 12; 21(1):281.
122. Apsangkar P, Chaudhry S, Naik M, Deoghare S, Joseph J. A prospective, randomized, double-blind, comparative clinical study of efficacy and safety of a biosimilar adalimumab with innovator product in patients with active rheumatoid arthritis on a stable dose of methotrexate. *Indian Journal of Rheumatology*. 2018; 13(2):84-89.
123. Cohen SB, Alten R, Kameda H, Hala T, Radominski SC, Rehman MI, et al. A randomized controlled trial comparing PF-06438179/GP1111 (an infliximab biosimilar) and infliximab reference product for treatment of moderate to severe active rheumatoid arthritis despite methotrexate therapy. *Arthritis Res Ther*. 2018 Jul 27; 20(1):155.
124. Haridas V, Katta R, Nalawade A, Kharkar S, Zhdan V, Garmish O, et al. Double-blind randomized parallel arm study of 3 anti CD20 monoclonal antibodies in patients with moderate to severe, sero-positive rheumatoid arthritis inadequately responding to metho-trexate based therapy. Efficacy safety & immunogenicity results. *Journal of rheumatology Conference: 73rd annual meeting of the canadian rheumatology association, CRA 2018 Canada*. 2018; 45(7):1052.
125. Matucci-Cerinic M, Allanore Y, Kavanaugh A, Buch MH, Schulze-Koops H, Kucharz EJ, et al. Efficacy, safety and immunogenicity of GP2015, an etanercept biosimilar, compared with the reference etanercept in patients with moderate-to-severe rheumatoid arthritis: 24-week results from the comparative phase III, randomised, double-blind EQUIRA study. *RMD Open*. 2018; 4(2):e000757.
126. Matsuno H, Tomomitsu M, Hagino A, Shin S, Lee J, Song YW. Phase III, multicentre, double-blind, randomised, parallel-group study to evaluate the similarities between LBEC0101 and etanercept reference product in terms of efficacy and safety in patients with active rheumatoid arthritis inadequately responding to methotrexate. *Annals of the Rheumatic Diseases*. 2018 Apr; 77(4):488-494.
127. Fleischmann RM, Alten R, Pilecky M, Lobello K, Hua SY, Cronenberger C, et al. A comparative clinical study of PF-06410293, a candidate adalimumab biosimilar, and adalimumab reference product (Humira) in the treatment of active rheumatoid arthritis. *Arthritis Res Ther*. 2018 Aug 15; 20(1):178.
128. Park W, Bozic-Majstorovic L, Milakovic D, Berrocal Kasay A, El-Khouri EC, Irazoque-Palazuelos F, et al. Comparison of biosimilar CT-P10 and innovator rituximab in patients with rheumatoid arthritis: a randomized controlled Phase 3 trial. *MAbs*. 2018 Aug/Sep; 10(6):934-943.
129. Weinblatt ME, Baranaskaite A, Niebrzydowski J, Dokoupilova E, Zielinska A, Jaworski J, et al. Phase III Randomized Study of SB5, an Adalimumab Biosimilar, Versus Reference Adalimumab in Patients With Moderate-to-Severe Rheumatoid Arthritis. *Arthritis rheumatol*. 2018 Jan; 70(1):40-48.
130. Nasonov E, Mazurov V, Plaksina T, Nesmeyanova O, Knyazeva L, Eremeeva A, et al. Interchangeability of innovator rituximab and its biosimilar: results from international controlled comparative 1-year study in patients with active rheumatoid arthritis. *Arthritis and rheumatology Conference: american college of rheumatology/association of rheumatology health professionals annual scientific meeting, ACR/ARHP 2016 United states Conference start: 20161111 Conference end: 20161116*. 2016; 68:2046-2047.
131. Smolen JS, Choe JY, Prodanovic N, Niebrzydowski J, Staykov I, Dokoupilova E, et al. Safety, immunogenicity and efficacy after switching from reference infliximab to biosimilar SB2 compared with continuing reference infliximab and SB2 in patients with rheumatoid arthritis: results of a

- randomised, double-blind, phase III transition study. *Annals of the Rheumatic Diseases*. 2018 Feb; 77(2):234-240.
132. Kavanaugh A, Matucci-Cerinic M, Schulze-Koops H, Buch M, Allanore Y, Kucharz EJ, et al. Phase 3 Equira 48 Week Study Results Demonstrated No Impact on Efficacy and Safety When Patients with Moderate-to-Severe Rheumatoid Arthritis Were Switched between Reference Etanercept (ETN) and GP2015, an Etanercept Biosimilar. 2018 ACR/ARHP Annual Meeting Chicago, USA; 2018: Arthritis and Rheumatology; 2018.
133. Jaworski J, Matucci-Cerinic M, Schulze-Koops H, Buch MH, Kucharz EJ, Allanore Y, et al. Switch from reference etanercept to SDZ ETN, an etanercept biosimilar, does not impact efficacy, safety, and immunogenicity of etanercept in patients with moderate-to-severe rheumatoid arthritis: 48-week results from the phase III, randomized, double-blind EQUIRA study. *Arthritis Res Ther*. 2019 May 28; 21(1):130.
134. Cohen SB, Alonso-Ruiz A, Klimiuk PA, Lee EC, Peter N, Sonderegger I, et al. Similar efficacy, safety and immunogenicity of adalimumab biosimilar BI 695501 and Humira reference product in patients with moderately to severely active rheumatoid arthritis: results from the phase III randomised VOLTAIRE-RA equivalence study. *Annals of the Rheumatic Diseases*. 2018 Jun; 77(6):914-921.
135. Genovese MC, Glover J, Matsunaga N, Chisholm D, Alten R. Efficacy, safety and immunogenicity in randomized, double-blind (DB) and open-label extension (OLE) studies comparing FKB327, an adalimumab biosimilar, with the adalimumab reference product (humira; rp) in patients (PTS) with active rheumatoid arthritis (RA). *Arthritis and rheumatology Conference: american college of rheumatology/association of rheumatology health professionals annual scientific meeting, ACR/ARHP 2017 United states*. 2017; 69(Supplement 10) (no pagination).
136. Jorgensen KK, Olsen IC, Goll GL, Lorentzen M, Bolstad N, Haavardsholm EA, et al. Switching from originator infliximab to biosimilar CT-P13 compared with maintained treatment with originator infliximab (NOR-SWITCH): a 52-week, randomised, double-blind, non-inferiority trial.[Erratum appears in *Lancet*. 2017 Jun 10;389(10086):2286; PMID: 28549661]. *Lancet*. 2017 06 10; 389(10086):2304-2316.
137. O'Dell J, Kivitz A, Takeuchi T, Tanaka Y, Louw I, Tiabut T, et al. Switching from etanercept to CHS-0214: a one year, randomized, double-blind study in patients with rheumatoid arthritis. *Annals of the rheumatic diseases Conference: annual european congress of rheumatology, EULAR 2017 Spain*. 2017; 76(Supplement 2):831.
138. Song YW, Matsuno H, Park MC, Tomomitsu M, Shin S, Lee J. Efficacy and safety of switching from etanercept product to LBEC0101 (etanercept biosimilar) compared with continuing LBEC0101 in patients with rheumatoid arthritis. *Annals of the rheumatic diseases Conference: annual european congress of rheumatology, EULAR 2018 Netherlands*. 2018; 77(Supplement 2):1389-1390.
139. Park MC, Matsuno H, Kim J, Park SH, Lee SH, Park YB, et al. Long-term efficacy, safety and immunogenicity in patients with rheumatoid arthritis continuing on an etanercept biosimilar (LBEC0101) or switching from reference etanercept to LBEC0101: an open-label extension of a phase III multicentre, randomised, double-blind, parallel-group study. *Arthritis Res Ther*. 2019 May 21; 21(1):122.
140. Weinblatt ME, Baranauskaite A, Dokoupilova E, Zielinska A, Jaworski J, Racewicz A, et al. Switching From Reference Adalimumab to SB5 (Adalimumab Biosimilar) in Patients With Rheumatoid Arthritis: Fifty-Two-Week Phase III Randomized Study Results. *Arthritis rheumatol*. 2018 Jun; 70(6):832-840.
141. Shin K, Baek HJ, Kang YM, Cha HS, Kang SW, Park SH, et al. Efficacy and safety of add-on tacrolimus versus leflunomide in rheumatoid arthritis patients with inadequate response to methotrexate. *International Journal of Rheumatic Diseases*. 2019 Mar 12; 12:12.
142. Register KA, Cannella AC, Mikuls TR, O'Dell JR. Leflunomide, sulfasalazine and hydroxychloroquine for rheumatoid arthritis: efficacious but poorly tolerated. *Arthritis and rheumatology Conference: american college of rheumatology/association of rheumatology health professionals annual scientific meeting, ACR/ARHP 2016 United states Conference start: 20161111 Conference end: 20161116*. 2016; 68:2014-2015.

143. Verschueren P, De Cock D, Corluy L, Joos R, Langenaken C, Taelman V, et al. Effectiveness of methotrexate with step-down glucocorticoid remission induction (COBRA Slim) versus other intensive treatment strategies for early rheumatoid arthritis in a treat-to-target approach: 1-year results of CareRA, a randomised pragmatic open-label superiority trial. *Annals of the Rheumatic Diseases*. 2017 Mar; 76(3):511-520.
144. Stouten V, Joly J, De Cock D, Pazmino S, Van Der Elst K, Westhovens R, et al. Sustained effectiveness after remission induction with methotrexate and step-down glucocorticoids in patients with early rheumatoid arthritis following a treat-to-target strategy after 2 years. *Arthritis and rheumatology Conference: american college of rheumatology/association of rheumatology health professionals annual scientific meeting, ACR/ARHP 2017 United states*. 2017; 69(Supplement 10) (no pagination).
145. Stamp LK, O'Donnell JL, Frampton C, Drake J, Zhang M, Barclay M, et al. A Pilot Randomized Controlled Double-Blind Trial of High- Versus Low-Dose Weekly Folic Acid in People With Rheumatoid Arthritis Receiving Methotrexate. *J*. 2018 Jul 11; 11:11.
146. Pope J, Rampakakis E, Vaillancourt J, Bessette L, Lazovskis J, Haraoui B, et al. An open-label randomized controlled trial of DMARD withdrawal in RA patients achieving therapeutic response with certolizumab pegol combined with DMARDs. *Rheumatology (Oxford)*. 2019 Oct 18.

## Section 5: List of abbreviations

|         |                                                              |
|---------|--------------------------------------------------------------|
| Δ       | Change from baseline                                         |
| ABA     | Abatacept                                                    |
| ACR     | American College of Rheumatology                             |
| ADA     | Adalimumab                                                   |
| ANA     | Anakinra                                                     |
| BARI    | Baricitinib                                                  |
| bdMARD  | Biological disease-modifying anti-rheumatic drug             |
| BID     | Twice daily                                                  |
| BLM     | Brodalumab                                                   |
| boDMARD | Biooriginator disease-modifying anti-rheumatic drug          |
| bsDMARD | Biosimilar disease-modifying anti-rheumatic drug             |
| CD      | Cluster of differentiation                                   |
| CDAI    | Clinical Disease Activity Index                              |
| csDMARD | Conventional synthetic disease-modifying anti-rheumatic drug |
| CZK     | Clazakizumab                                                 |
| CZP     | Certolizumab pegol                                           |
| DAS28   | Disease Activity Score of 28 Joints                          |
| DEC     | Decernotinib                                                 |
| ETN     | Etanercept                                                   |
| FILGO   | Filgotinib                                                   |
| FOSTA   | Fostamatinib                                                 |
| GC      | Glucocorticoids                                              |
| GKM     | Guselkumab                                                   |
| GLM     | Golimumab                                                    |
| GM-CSF  | Granulocyte-macrophage colony-stimulating factor             |
| HAQ     | Health Assessment Questionnaire Disability Index             |
| HCQ     | Hydroxychloroquine                                           |
| IL      | Interleukin                                                  |
| IR      | Insufficient responder                                       |
| JAK     | Janus Kinase                                                 |
| LEF     | Leflunomide                                                  |
| MMP-3   | Matrix metalloproteinase 3                                   |
| MMP-3   | Matrix metalloproteinase-3                                   |
| mTSS    | Modified total Sharp Score                                   |
| MTX     | Methotrexate                                                 |
| MVM     | Mavrilimumab                                                 |
| NR      | Not reported                                                 |
| NS      | Not significant                                              |
| OD      | Once daily                                                   |
| OKM     | Olokizumab                                                   |
| PEF     | Peficitinib                                                  |
| QNW     | Every N weeks                                                |
| R       | receptor                                                     |
| RA      | Rheumatoid Arthritis                                         |
| RoB     | Risk of bias                                                 |
| RTX     | Rituximab                                                    |
| SAR     | Sarilumab                                                    |
| SDAI    | Simplified Disease Activity Index                            |
| SEC     | Secukinumab                                                  |

|         |                                                          |
|---------|----------------------------------------------------------|
| SKM     | Sirukumab                                                |
| SYK     | Spleen tyrosine kinase                                   |
| SZP/SSZ | Sulfasalazine                                            |
| TBM     | Tabalumab                                                |
| TCZ     | Tocilizumab                                              |
| TLM     | Tregalizumab                                             |
| TNF     | Tumor necrosis factor alpha                              |
| TOFA    | Tofacitinib                                              |
| tsDMARD | Targeted synthetic disease-modifying anti-rheumatic drug |
| UKM     | Ustekinumab                                              |
| UPA     | Upadacitinib                                             |
| VBM     | Vobarilizumab                                            |
